# Supplementary material for: Diminished retinal complex lipid synthesis and impaired fatty acid β-oxidation associated with human diabetic retinopathy
Source: PubMed Central journal article supplement (PMC8525591; doi:10.1172/jci.insight.152109), 2021-10-08

**Supplement:**

**Table S1:** Identified lipids by adducts, mass, and retention time in positive and negative modes in Pima cohort. The mass accuracy was  $\pm 0.001$  Da in positive mode and  $\pm 0.005$  Da in negative mode, with overall mass error of less than 2 parts per million. AC, Acylcarnitines; CE, cholesterol Esters; DAG, diacylglycerol; LPC, lysophosphatidylcholine; LPE, lysophosphatidylethanolamine; MAG, monoacylglycerol; PC, phosphatidylcholine; pPC, plasmeyn-lyl-phosphatidylcholine; PE, phosphatidylethanolamine; pPE: plasmeyn-lyl-phosphatidylethanolamine; PA, phosphatidic acid; SM, sphingomyelin; TAG, triacylglycerol; FFA, free Fatty Acid; CerP, ceramide-phosphates; PG, phosphatidylglycerol; PI, phosphatidylinositol; x:y, number of carbons:number of double bonds.

| <b>Lipids in Positive Mode</b> |                      |                        |                      |               |
|--------------------------------|----------------------|------------------------|----------------------|---------------|
| <b>Class</b>                   | <b>Compound name</b> | <b>Type of adducts</b> | <b>m/z</b>           | <b>RT/min</b> |
| CE                             | CE 16:0              | [M+NH <sub>4</sub> ]   | 642.6189             | 10.92         |
|                                | CE 16:1              | [M+NH <sub>4</sub> ]   | 640.6032             | 10.65         |
|                                | CE 17:0              | [M+NH <sub>4</sub> ]   | 656.6345             | 11.11         |
|                                | CE 18:0              | [M+NH <sub>4</sub> ]   | 670.6502             | 11.28         |
|                                | CE 18:1              | [M+NH <sub>4</sub> ]   | 668.6345             | 10.89         |
|                                | CE 18:2              | [M+NH <sub>4</sub> ]   | 666.6189             | 10.72         |
|                                | CE 18:3              | [M+NH <sub>4</sub> ]   | 664.6032             | 10.48         |
|                                | CE 20:3              | [M+NH <sub>4</sub> ]   | 692.6345             | 10.74         |
|                                | CE 20:4              | [M+NH <sub>4</sub> ]   | 690.6189             | 10.52         |
|                                | CE 20:5              | [M+NH <sub>4</sub> ]   | 688.6032             | 10.37         |
|                                | CE 22:4              | [M+NH <sub>4</sub> ]   | 718.6502             | 10.82         |
|                                | CE 22:5              | [M+NH <sub>4</sub> ]   | 716.6345             | 10.64         |
|                                | CE 22:6              | [M+NH <sub>4</sub> ]   | 714.6189             | 10.48         |
|                                | DAG                  | DAG 26:0               | [M+NH <sub>4</sub> ] | 502.4469      |
| DAG 30:0                       |                      | [M+NH <sub>4</sub> ]   | 558.5094             | 7.38          |
| DAG 30:1                       |                      | [M+NH <sub>4</sub> ]   | 556.4938             | 6.89          |
| DAG 31:0                       |                      | [M+NH <sub>4</sub> ]   | 572.5251             | 7.69          |
| DAG 32:0                       |                      | [M+NH <sub>4</sub> ]   | 586.5407             | 7.90          |
| DAG 32:1                       |                      | [M+NH <sub>4</sub> ]   | 584.5251             | 7.48          |
| DAG 32:2                       |                      | [M+NH <sub>4</sub> ]   | 582.5094             | 7.03          |
| DAG 33:0                       |                      | [M+NH <sub>4</sub> ]   | 600.5564             | 8.12          |
| DAG 33:1                       |                      | [M+NH <sub>4</sub> ]   | 598.5407             | 7.76          |
| DAG 34:0                       |                      | [M+NH <sub>4</sub> ]   | 614.5720             | 8.40          |
| DAG 34:1                       |                      | [M+NH <sub>4</sub> ]   | 612.5564             | 7.96          |
| DAG 34:2                       |                      | [M+NH <sub>4</sub> ]   | 610.5407             | 7.58          |
| DAG 34:3                       |                      | [M+NH <sub>4</sub> ]   | 608.5251             | 7.19          |
| DAG 35:1                       |                      | [M+NH <sub>4</sub> ]   | 626.5720             | 8.20          |
| DAG 35:2                       |                      | [M+NH <sub>4</sub> ]   | 624.5564             | 7.83          |
| DAG 36:0                       |                      | [M+NH <sub>4</sub> ]   | 642.6033             | 8.86          |
| DAG 36:1                       |                      | [M+NH <sub>4</sub> ]   | 640.5877             | 8.47          |
| DAG 36:2                       |                      | [M+NH <sub>4</sub> ]   | 638.5720             | 8.07          |

| <b>Lipids in Positive Mode</b> |                      |                        |            |               |
|--------------------------------|----------------------|------------------------|------------|---------------|
| <b>Class</b>                   | <b>Compound name</b> | <b>Type of adducts</b> | <b>m/z</b> | <b>RT/min</b> |
|                                | DAG 36:3             | [M+NH4]                | 636.5564   | 7.68          |
|                                | DAG 36:4             | [M+NH4]                | 634.5407   | 7.33          |
|                                | DAG 36:5             | [M+NH4]                | 632.5251   | 6.94          |
|                                | DAG 38:1             | [M+NH4]                | 668.6189   | 8.93          |
|                                | DAG 38:2             | [M+NH4]                | 666.6033   | 8.52          |
|                                | DAG 38:4             | [M+NH4]                | 662.5720   | 7.90          |
|                                | DAG 38:5             | [M+NH4]                | 660.5564   | 7.61          |
|                                | DAG 38:6             | [M+NH4]                | 658.5407   | 7.25          |
|                                | DAG 38:7             | [M+NH4]                | 656.5251   | 6.89          |
|                                | DAG 40:6             | [M+NH4]                | 686.5720   | 7.68          |
|                                | DAG 40:7             | [M+NH4]                | 684.5564   | 7.52          |
| LPC                            | LPC 14:0             | [M+H]                  | 468.3090   | 1.10          |
|                                | LPC 14:0             | [M+Na]                 | 490.2910   | 1.16          |
|                                | LPC 15:0             | [M+H]                  | 482.3246   | 1.36          |
|                                | LPC 15:0             | [M+Na]                 | 504.3066   | 1.37          |
|                                | LPC 16:0             | [M+H]                  | 496.3403   | 1.62          |
|                                | LPC 16:0             | [M+Na]                 | 504.3430   | 2.11          |
|                                | LPC 16:1             | [M+H]                  | 494.3246   | 1.33          |
|                                | LPC 16:1             | [M+Na]                 | 516.3066   | 1.25          |
|                                | LPC 17:0             | [M+H]                  | 510.3560   | 2.05          |
|                                | LPC 17:0             | [M+Na]                 | 532.3379   | 2.01          |
|                                | LPC 17:1             | [M+H]                  | 508.3403   | 1.49          |
|                                | LPC 18:0             | [M+H]                  | 524.3716   | 2.49          |
|                                | LPC 18:0             | [M+Na]                 | 546.3535   | 2.38          |
|                                | LPC 18:1             | [M+Na]                 | 544.3379   | 1.69          |
|                                | LPC 18:2             | [M+H]                  | 520.3403   | 1.60          |
|                                | LPC 18:2             | [M+Na]                 | 542.3223   | 1.43          |
|                                | LPC 18:3             | [M+H]                  | 518.3246   | 1.12          |
|                                | LPC 18:3             | [M+Na]                 | 540.3066   | 1.15          |
|                                | LPC 19:0             | [M+H]                  | 538.3873   | 2.96          |
|                                | LPC 20:0             | [M+H]                  | 552.4029   | 3.44          |
|                                | LPC 20:1             | [M+H]                  | 550.3873   | 2.64          |
|                                | LPC 20:1             | [M+Na]                 | 572.3692   | 2.62          |
|                                | LPC 20:2             | [M+H]                  | 548.3716   | 20            |
|                                | LPC 20:3             | [M+H]                  | 546.3560   | 1.61          |
|                                | LPC 20:3             | [M+Na]                 | 568.3379   | 1.60          |
|                                | LPC 20:4             | [M+H]                  | 544.3403   | 1.45          |
|                                | LPC 20:4             | [M+Na]                 | 566.3223   | 1.34          |
|                                | LPC 20:5             | [M+H]                  | 542.3246   | 1.08          |
|                                | LPC 22:4             | [M+H]                  | 572.3716   | 1.86          |
|                                | LPC 22:4             | [M+Na]                 | 594.3535   | 1.88          |
|                                | LPC 22:5             | [M+H]                  | 570.3560   | 1.51          |

| <b>Lipids in Positive Mode</b> |                      |                        |            |               |
|--------------------------------|----------------------|------------------------|------------|---------------|
| <b>Class</b>                   | <b>Compound name</b> | <b>Type of adducts</b> | <b>m/z</b> | <b>RT/min</b> |
|                                | LPC 22:6             | [M+H]                  | 568.3403   | 1.30          |
|                                | LPC 24:0             | [M+H]                  | 608.4655   | 5.30          |
| LPE                            | LPE 16:0             | [M+H]                  | 454.2934   | 1.69          |
|                                | LPE 18:0             | [M+H]                  | 482.3246   | 2.48          |
|                                | LPE 18:0             | [M+Na]                 | 504.3066   | 2.62          |
|                                | LPE 18:1             | [M+H]                  | 480.3090   | 1.87          |
|                                | LPE 18:2             | [M+H]                  | 478.2934   | 1.40          |
|                                | LPE 20:4             | [M+H]                  | 502.2934   | 1.34          |
|                                | LPE 22:6             | [M+H]                  | 526.2933   | 1.29          |
|                                | MAG                  | MAG 17:0               | [M+Li]     | 351.3087      |
| MAG 18:1                       |                      | [M+NH4]                | 374.3270   | 2.90          |
| PA                             | PA 34:0              | [M+Na]                 | 699.4941   | 8.37          |
| PC                             | PC 30:0              | [M+Na]                 | 728.5206   | 6.07          |
|                                | PC 30:1              | [M+Na]                 | 726.5050   | 5.54          |
|                                | PC 32:0              | [M+Na]                 | 756.5519   | 6.75          |
|                                | PC 32:1              | [M+Na]                 | 754.5363   | 6.23          |
|                                | PC 32:2              | [M+Na]                 | 752.5206   | 5.75          |
|                                | PC 32:3              | [M+H]                  | 728.5230   | 5.37          |
|                                | PC 33:2              | [M+Na]                 | 766.5363   | 6.09          |
|                                | PC 34:0              | [M+Na]                 | 784.5832   | 7.43          |
|                                | PC 34:2              | [M+Na]                 | 780.5519   | 6.42          |
|                                | PC 34:3              | [M+H]                  | 756.5543   | 6.78          |
|                                | PC 34:3              | [M+Na]                 | 778.5363   | 5.93          |
|                                | PC 34:4              | [M+Na]                 | 776.5206   | 5.68          |
|                                | PC 36:1              | [M+Na]                 | 810.5989   | 7.57          |
|                                | PC 36:2              | [M+Na]                 | 808.5832   | 7.16          |
|                                | PC 36:3              | [M+H]                  | 784.5856   | 7.45          |
|                                | PC 36:4              | [M+H]                  | 782.5700   | 7.86          |
|                                | PC 36:4              | [M+Na]                 | 804.5519   | 6.08          |
|                                | PC 36:5              | [M+H]                  | 780.5543   | 5.60          |
|                                | PC 36:5              | [M+Na]                 | 802.5363   | 5.73          |
|                                | PC 36:6              | [M+H]                  | 778.5387   | 5.89          |
|                                | PC 38:4              | [M+H]                  | 810.6013   | 7.56          |
|                                | PC 38:4              | [M+Na]                 | 832.5832   | 7.02          |
|                                | PC 38:5              | [M+H]                  | 808.5856   | 5.09          |
|                                | PC 38:6              | [M+H]                  | 806.5700   | 6.03          |
|                                | PC 38:6              | [M+Na]                 | 828.5519   | 5.44          |
|                                | PC 38:6              | [M+Na]                 | 828.5519   | 6.14          |
|                                | PC 38:8              | [M+H]                  | 802.5387   | 5.86          |
|                                | PC 40:10             | [M+H]                  | 826.5387   | 5.62          |
|                                | PC 40:4              | [M+Na]                 | 860.6145   | 7.55          |
|                                | PC 40:9              | [M+H]                  | 828.5543   | 6.09          |

| <b>Lipids in Positive Mode</b> |                      |                        |            |               |
|--------------------------------|----------------------|------------------------|------------|---------------|
| <b>Class</b>                   | <b>Compound name</b> | <b>Type of adducts</b> | <b>m/z</b> | <b>RT/min</b> |
|                                | PC 42:10             | [M+H]                  | 854.5700   | 5.83          |
| PE                             | PE 32:1              | [M+H]                  | 690.5074   | 6.27          |
|                                | PE 34:0              | [M+H]                  | 720.5543   | 7.38          |
|                                | PE 34:1              | [M+H]                  | 718.5387   | 6.90          |
|                                | PE 34:2              | [M+H]                  | 716.5230   | 6.46          |
|                                | PE 35:2              | [M+H]                  | 730.5387   | 6.79          |
|                                | PE 36:0              | [M+H]                  | 748.5856   | 7.91          |
|                                | PE 36:1              | [M+H]                  | 746.5700   | 7.50          |
|                                | PE 36:2              | [M+H]                  | 744.5543   | 7.01          |
|                                | PE 36:2              | [M+H]                  | 744.5543   | 7.12          |
|                                | PE 36:3              | [M+H]                  | 742.5387   | 6.59          |
|                                | PE 36:4              | [M+H]                  | 740.5230   | 6.40          |
|                                | PE 36:5              | [M+H]                  | 738.5074   | 5.88          |
|                                | PE 38:3              | [M+H]                  | 770.5700   | 7.28          |
|                                | PE 38:4              | [M+H]                  | 768.5543   | 7.04          |
|                                | PE 38:5              | [M+H]                  | 766.5387   | 6.54          |
|                                | PE 40:6              | [M+H]                  | 792.5543   | 6.94          |
| pPC                            | pPC 18:0             | [M+Na]                 | 544.3379   | 1.89          |
| pPE                            | pPE 34:1             | [M+H]                  | 702.5438   | 7.22          |
|                                | pPE 34:2             | [M+H]                  | 700.5281   | 6.75          |
|                                | pPE 34:2             | [M+H]                  | 700.5281   | 6.82          |
|                                | pPE 36:1             | [M+H]                  | 730.5751   | 7.80          |
|                                | pPE 36:2             | [M+H]                  | 728.5594   | 7.37          |
|                                | pPE 36:4             | [M+H]                  | 724.5281   | 6.72          |
|                                | pPE 36:5             | [M+H]                  | 722.5125   | 6.34          |
|                                | pPE 38:1             | [M+H]                  | 758.6063   | 8.27          |
|                                | pPE 38:2             | [M+H]                  | 756.5907   | 7.95          |
|                                | pPE 38:3             | [M+H]                  | 754.5751   | 7.58          |
|                                | pPE 38:4             | [M+H]                  | 752.5594   | 7.33          |
|                                | pPE 38:6             | [M+H]                  | 748.5281   | 6.64          |
|                                | pPE 40:4             | [M+H]                  | 780.5907   | 7.78          |
|                                | pPE 40:5             | [M+H]                  | 778.5751   | 7.46          |
|                                | pPE 40:6             | [M+H]                  | 776.5594   | 7.25          |
| SM                             | SM 21:0              | [M]                    | 523.3876   | 1.87          |
|                                | SM 30:1              | [M]                    | 647.5128   | 4.46          |
|                                | SM 30:1              | [M+Na]                 | 669.4948   | 4.41          |
|                                | SM 31:1              | [M]                    | 661.5284   | 4.84          |
|                                | SM 32:0              | [M]                    | 677.5597   | 5.53          |
|                                | SM 32:0              | [M+Na]                 | 699.5417   | 5.47          |
|                                | SM 32:1              | [M+Na]                 | 697.5261   | 2.13          |
|                                | SM 32:1              | [M+Na]                 | 697.5261   | 5.23          |
|                                | SM 32:2              | [M]                    | 673.5284   | 4.66          |

| <b>Lipids in Positive Mode</b> |                      |                        |            |               |
|--------------------------------|----------------------|------------------------|------------|---------------|
| <b>Class</b>                   | <b>Compound name</b> | <b>Type of adducts</b> | <b>m/z</b> | <b>RT/min</b> |
|                                | SM 33:0              | [M]                    | 691.5754   | 5.86          |
|                                | SM 33:1              | [M]                    | 689.5597   | 4.41          |
|                                | SM 33:1              | [M+Na]                 | 711.5417   | 5.60          |
|                                | SM 33:2              | [M]                    | 687.5441   | 5.05          |
|                                | SM 34:1              | [M]                    | 703.5754   | 5.89          |
|                                | SM 34:1              | [M+Na]                 | 725.5573   | 5.94          |
|                                | SM 34:2              | [M+Na]                 | 723.5417   | 5.37          |
|                                | SM 35:1              | [M]                    | 717.5911   | 5.67          |
|                                | SM 35:1              | [M]                    | 717.5911   | 6.26          |
|                                | SM 35:1              | [M+Na]                 | 739.5730   | 6.27          |
|                                | SM 35:2              | [M]                    | 715.5754   | 5.66          |
|                                | SM 35:2              | [M+Na]                 | 737.5573   | 5.78          |
|                                | SM 36:1              | [M+Na]                 | 753.5886   | 6.67          |
|                                | SM 36:2              | [M+Na]                 | 751.5730   | 6.14          |
|                                | SM 37:1              | [M]                    | 745.6224   | 6.97          |
|                                | SM 37:2              | [M]                    | 743.6067   | 6.56          |
|                                | SM 38:0              | [M]                    | 761.6536   | 7.55          |
|                                | SM 38:1              | [M]                    | 759.6380   | 7.10          |
|                                | SM 38:1              | [M+Na]                 | 781.6199   | 7.32          |
|                                | SM 38:2              | [M]                    | 757.6224   | 6.69          |
|                                | SM 38:4              | [M]                    | 753.5911   | 5.87          |
|                                | SM 39:0              | [M]                    | 775.6693   | 7.85          |
|                                | SM 39:1              | [M+Na]                 | 795.6356   | 7.66          |
|                                | SM 39:2              | [M]                    | 771.6380   | 7.15          |
|                                | SM 40:1              | [M+Na]                 | 809.6513   | 7.92          |
|                                | SM 40:2              | [M]                    | 785.6536   | 7.05          |
|                                | SM 40:2              | [M+Na]                 | 807.6356   | 7.44          |
|                                | SM 41:1              | [M+Na]                 | 823.6669   | 8.21          |
|                                | SM 41:2              | [M+Na]                 | 821.6513   | 7.76          |
|                                | SM 41:4              | [M]                    | 795.6380   | 6.86          |
|                                | SM 41:5              | [M]                    | 793.6224   | 6.32          |
|                                | SM 42:1              | [M+Na]                 | 837.6826   | 8.49          |
|                                | SM 42:2              | [M]                    | 813.6849   | 11.70         |
|                                | SM 42:2              | [M+Na]                 | 835.6669   | 7.93          |
|                                | SM 42:4              | [M]                    | 809.6536   | 7.00          |
|                                | SM 42:5              | [M]                    | 807.6380   | 6.61          |
|                                | SM 43:1              | [M]                    | 829.7163   | 8.77          |
|                                | SM 43:1              | [M+Na]                 | 851.6982   | 8.78          |
|                                | SM 43:2              | [M]                    | 827.7006   | 8.31          |
|                                | SM 43:4              | [M]                    | 823.6693   | 7.34          |
|                                | SM 44:1              | [M]                    | 843.7319   | 9.05          |
|                                | SM 44:2              | [M]                    | 841.7163   | 8.49          |

| <b>Lipids in Positive Mode</b> |                      |                        |            |               |
|--------------------------------|----------------------|------------------------|------------|---------------|
| <b>Class</b>                   | <b>Compound name</b> | <b>Type of adducts</b> | <b>m/z</b> | <b>RT/min</b> |
| TAG                            | TAG 40:0             | [M+NH4]                | 712.6451   | 9.45          |
|                                | TAG 42:0             | [M+NH4]                | 740.6764   | 9.77          |
|                                | TAG 42:1             | [M+NH4]                | 738.6608   | 9.49          |
|                                | TAG 44:1             | [M+NH4]                | 766.6921   | 9.79          |
|                                | TAG 46:0             | [M+NH4]                | 796.7390   | 10.31         |
|                                | TAG 46:1             | [M+Na]                 | 799.6787   | 10.08         |
|                                | TAG 46:1             | [M+NH4]                | 794.7233   | 10.04         |
|                                | TAG 46:2             | [M+NH4]                | 792.7077   | 9.80          |
|                                | TAG 48:0             | [M+NH4]                | 824.7702   | 10.55         |
|                                | TAG 48:1             | [M+NH4]                | 822.7546   | 10.29         |
|                                | TAG 48:2             | [M+NH4]                | 820.7390   | 10.07         |
|                                | TAG 48:3             | [M+NH4]                | 818.7233   | 9.84          |
|                                | TAG 49:0             | [M+NH4]                | 838.7859   | 10.66         |
|                                | TAG 49:1             | [M+NH4]                | 836.7702   | 10.45         |
|                                | TAG 49:2             | [M+NH4]                | 834.7546   | 10.24         |
|                                | TAG 50:0             | [M+NH4]                | 852.8015   | 10.79         |
|                                | TAG 50:1             | [M+NH4]                | 850.7859   | 10.53         |
|                                | TAG 50:2             | [M+NH4]                | 848.7702   | 10.30         |
|                                | TAG 50:3             | [M+NH4]                | 846.7546   | 10.11         |
|                                | TAG 50:3             | [M+NH4]                | 846.7546   | 9.20          |
|                                | TAG 50:4             | [M+NH4]                | 844.7390   | 8.98          |
|                                | TAG 50:4             | [M+NH4]                | 844.7390   | 9.91          |
|                                | TAG 50:5             | [M+NH4]                | 842.7233   | 9.73          |
|                                | TAG 51:1             | [M+NH4]                | 864.8015   | 10.69         |
|                                | TAG 51:2             | [M+NH4]                | 862.7859   | 10.51         |
|                                | TAG 51:3             | [M+NH4]                | 860.7702   | 10.31         |
|                                | TAG 51:4             | [M+NH4]                | 858.7546   | 10.06         |
|                                | TAG 52:0             | [M+Na]                 | 885.7882   | 11.02         |
|                                | TAG 52:0             | [M+NH4]                | 880.8328   | 11.03         |
|                                | TAG 52:1             | [M+Na]                 | 883.7726   | 10.82         |
|                                | TAG 52:1             | [M+NH4]                | 878.8172   | 10.80         |
|                                | TAG 52:2             | [M+NH4]                | 876.8015   | 10.54         |
|                                | TAG 52:3             | [M+Na]                 | 879.7413   | 10.38         |
|                                | TAG 52:3             | [M+NH4]                | 874.7859   | 10.36         |
|                                | TAG 52:4             | [M+NH4]                | 872.7702   | 10.17         |
|                                | TAG 52:4             | [M+NH4]                | 872.7702   | 9.27          |
|                                | TAG 52:5             | [M+NH4]                | 870.7546   | 9.99          |
|                                | TAG 52:6             | [M+Na]                 | 873.6944   | 9.77          |
|                                | TAG 52:6             | [M+NH4]                | 868.7390   | 9.79          |
|                                | TAG 53:0             | [M+NH4]                | 894.8484   | 11.14         |
| TAG 53:1                       | [M+NH4]              | 892.8328               | 10.92      |               |
| TAG 53:2                       | [M+NH4]              | 890.8172               | 10.73      |               |

| <b>Lipids in Positive Mode</b> |                      |                        |            |               |
|--------------------------------|----------------------|------------------------|------------|---------------|
| <b>Class</b>                   | <b>Compound name</b> | <b>Type of adducts</b> | <b>m/z</b> | <b>RT/min</b> |
|                                | TAG 53:3             | [M+NH4]                | 888.8015   | 10.54         |
|                                | TAG 53:4             | [M+NH4]                | 886.7859   | 10.34         |
|                                | TAG 53:5             | [M+NH4]                | 884.7702   | 10.16         |
|                                | TAG 54:1             | [M+Na]                 | 911.8038   | 11.02         |
|                                | TAG 54:1             | [M+NH4]                | 906.8484   | 11.05         |
|                                | TAG 54:2             | [M+NH4]                | 904.8328   | 10.84         |
|                                | TAG 54:3             | [M+NH4]                | 902.8172   | 10.63         |
|                                | TAG 54:4             | [M+NH4]                | 900.8015   | 10.42         |
|                                | TAG 54:5             | [M+NH4]                | 898.7859   | 10.24         |
|                                | TAG 54:6             | [M+Na]                 | 901.7257   | 10.04         |
|                                | TAG 54:6             | [M+NH4]                | 896.7702   | 10.04         |
|                                | TAG 54:7             | [M+Na]                 | 899.7100   | 9.84          |
|                                | TAG 54:7             | [M+NH4]                | 894.7546   | 9.89          |
|                                | TAG 54:8             | [M+NH4]                | 892.7390   | 9.67          |
|                                | TAG 56:0             | [M+NH4]                | 936.8954   | 11.52         |
|                                | TAG 56:1             | [M+NH4]                | 934.8797   | 11.28         |
|                                | TAG 56:2             | [M+NH4]                | 932.8641   | 11.06         |
|                                | TAG 56:3             | [M+NH4]                | 930.8484   | 10.87         |
|                                | TAG 56:4             | [M+NH4]                | 928.8328   | 10.70         |
|                                | TAG 56:5             | [M+NH4]                | 926.8172   | 10.54         |
|                                | TAG 56:6             | [M+NH4]                | 924.8015   | 10.36         |
|                                | TAG 56:7             | [M+NH4]                | 922.7859   | 10.17         |
|                                | TAG 56:8             | [M+NH4]                | 920.7702   | 9.99          |
|                                | TAG 56:9             | [M+NH4]                | 918.7546   | 9.82          |
|                                | TAG 58:1             | [M+NH4]                | 962.9110   | 11.55         |
|                                | TAG 58:10            | [M+NH4]                | 944.7702   | 9.91          |
|                                | TAG 58:3             | [M+NH4]                | 958.8797   | 11.10         |
|                                | TAG 58:5             | [M+NH4]                | 954.8484   | 10.76         |
|                                | TAG 58:6             | [M+NH4]                | 952.8328   | 10.60         |
|                                | TAG 58:7             | [M+NH4]                | 950.8172   | 10.49         |
|                                | TAG 58:8             | [M+NH4]                | 948.8015   | 10.23         |
|                                | TAG 58:9             | [M+NH4]                | 946.7859   | 10.10         |
|                                | TAG 60:12            | [M+NH4]                | 968.7702   | 10.88         |
|                                | TAG 62:1             | [M+NH4]                | 1018.9740  | 12.09         |
| Acylcarnitines                 | L_Carnitine          |                        | 162.1      | 0.57          |
|                                | AC2:0                |                        | 204.1      | 0.73          |
|                                | AC3:0                |                        | 218.2      | 0.87          |
|                                | AC4:0                |                        | 232.2      | 3.22          |
|                                | AC5:0                |                        | 246.2      | 3.86          |
|                                | AC6:0                |                        | 260.2      | 4.50          |
|                                | AC8:1                |                        | 286.2      | 5.30          |
|                                | AC8:0                |                        | 288.2      | 6.12          |

| <b>Lipids in Positive Mode</b> |                      |                        |            |               |
|--------------------------------|----------------------|------------------------|------------|---------------|
| <b>Class</b>                   | <b>Compound name</b> | <b>Type of adducts</b> | <b>m/z</b> | <b>RT/min</b> |
|                                | AC10:1               |                        | 314.2      | 6.80          |
|                                | AC10:0               |                        | 316.2      | 7.30          |
|                                | AC12:0-OH            |                        | 360.2      | 7.40          |
|                                | AC12:1               |                        | 342.2      | 7.40          |
|                                | AC12:0               |                        | 344.2      | 8.20          |
|                                | AC14:0-OH            |                        | 388.3      | 8.20          |
|                                | AC14:1               |                        | 370.3      | 8.20          |
|                                | AC14:0               |                        | 372.3      | 9.10          |
|                                | AC14:2               |                        | 368.3      | 7.80          |
|                                | AC16:0-OH            |                        | 416.3      | 9.20          |
|                                | AC16:1               |                        | 398.3      | 9.20          |
|                                | AC16:0               |                        | 400.3      | 9.80          |
|                                | AC18:2-OH            |                        | 424.3      | 9.20          |
|                                | AC18:2               |                        | 424.3      | 9.40          |
|                                | AC18:1               |                        | 426.3      | 10.00         |
|                                | AC18:0               |                        | 428.3      | 10.80         |
|                                | AC20:4               |                        | 448.3      | 9.70          |
|                                | AC20:3               |                        | 450.2      | 10.00         |
|                                | AC20:2               |                        | 452.3      | 10.30         |
|                                | AC20:1               |                        | 454.3      | 11.00         |
|                                | AC20:0               |                        | 456.3      | 12.30         |

| <b>Lipids in Negative Mode</b> |                      |                        |            |               |
|--------------------------------|----------------------|------------------------|------------|---------------|
| <b>Class</b>                   | <b>Compound name</b> | <b>Type of Adducts</b> | <b>m/z</b> | <b>RT/min</b> |
| FFA                            | FFA 16:0             |                        | 255.2329   | 2.30          |
|                                | FFA 18:0             |                        | 283.2642   | 3.27          |
|                                | FFA 18:1             |                        | 281.2486   | 2.50          |
|                                | FFA 18:2             |                        | 279.2329   | 1.92          |
|                                | FFA 20:0             |                        | 311.2955   | 4.30          |
|                                | FFA 20:1             |                        | 309.2799   | 3.45          |
|                                | FFA 20:2             |                        | 307.2642   | 2.82          |
|                                | FFA 22:0             |                        | 339.3268   | 5.29          |
|                                | FFA 22:1             |                        | 337.3112   | 4.43          |
|                                | FFA 22:2             |                        | 335.2955   | 3.76          |
|                                | FFA 22:3             |                        | 333.2799   | 3.18          |
|                                | FFA 24:0             |                        | 367.3581   | 6.21          |
|                                | FFA 24:1             |                        | 365.3425   | 5.36          |
|                                | FFA 24:2             |                        | 363.3268   | 4.70          |
|                                | FFA 24:3             |                        | 361.3112   | 4.07          |
|                                | FFA 20:4             |                        | 303.2329   | 1.85          |



| <b>Lipids in Negative Mode</b> |                                 |                        |            |               |
|--------------------------------|---------------------------------|------------------------|------------|---------------|
| <b>Class</b>                   | <b>Compound name</b>            | <b>Type of Adducts</b> | <b>m/z</b> | <b>RT/min</b> |
| CerP                           | CerP 34:1                       | [M-H]                  | 616.4706   | 5.91          |
| LPE                            | LPE 16:0                        | [M-H]                  | 452.2777   | 1.71          |
|                                | LPE 18:0                        | [M-H]                  | 480.3090   | 2.49          |
|                                | LPE 18:1                        | [M-H]                  | 478.2934   | 1.88          |
|                                | LPE 18:2                        | [M-H]                  | 476.2777   | 1.40          |
|                                | LPE 20:3                        | [M-H]                  | 502.2934   | 1.68          |
|                                | LPE 20:4                        | [M-H]                  | 500.2777   | 1.37          |
|                                | LPE 22:4                        | [M-H]                  | 528.3090   | 1.91          |
|                                | LPE 22:5                        | [M-H]                  | 526.2934   | 1.62          |
|                                | LPE 22:6                        | [M-H]                  | 524.2777   | 1.33          |
| Spinganine                     | N-(hexadecanoyl)-sphing-4-enine | [M-H]                  | 536.5041   | 6.85          |
| PA                             | PA 34:2                         | [M-H]                  | 671.4652   | 6.36          |
| PC                             | PC 30:0                         | [M-Ac-H]               | 764.5442   | 6.12          |
|                                | PC 30:1                         | [M-Ac-H]               | 762.5285   | 5.59          |
|                                | PC 30:2                         | [M-Ac-H]               | 760.5129   | 5.06          |
|                                | PC 32:0                         | [M-Ac-H]               | 792.5754   | 6.81          |
|                                | PC 32:1                         | [M-Ac-H]               | 790.5598   | 6.26          |
|                                | PC 32:2                         | [M-Ac-H]               | 788.5442   | 5.77          |
|                                | PC 32:3                         | [M-Ac-H]               | 786.5285   | 5.32          |
|                                | PC 33:1                         | [M-Ac-H]               | 804.5754   | 6.60          |
|                                | PC 33:2                         | [M-Ac-H]               | 802.5598   | 6.13          |
|                                | PC 34:1                         | [M-Ac-H]               | 818.5911   | 6.85          |
|                                | PC 34:2                         | [M-Ac-H]               | 816.5754   | 4.54          |
|                                | PC 34:3                         | [M-Ac-H]               | 814.5598   | 5.94          |
|                                | PC 34:4                         | [M-Ac-H]               | 812.5442   | 5.71          |
|                                | PC 35:1                         | [M-Ac-H]               | 832.6068   | 7.24          |
|                                | PC 35:2                         | [M-Ac-H]               | 830.5911   | 6.75          |
|                                | PC 35:3                         | [M-Ac-H]               | 828.5754   | 6.26          |
|                                | PC 36:1                         | [M-Ac-H]               | 846.6224   | 7.54          |
|                                | PC 36:2                         | [M-Ac-H]               | 844.6068   | 10.73         |
|                                | PC 36:2                         | [M-Ac-H]               | 844.6068   | 7.04          |
|                                | PC 36:3                         | [M-Ac-H]               | 842.5911   | 6.56          |
|                                | PC 36:4                         | [M-Ac-H]               | 840.5754   | 6.23          |
|                                | PC 36:5                         | [M-Ac-H]               | 838.5598   | 5.81          |
|                                | PC 36:6                         | [M-Ac-H]               | 836.5442   | 5.45          |
|                                | PC 37:2                         | [M-Ac-H]               | 858.6224   | 7.42          |
|                                | PC 37:3                         | [M-Ac-H]               | 856.6068   | 6.91          |
|                                | PC 37:4                         | [M-Ac-H]               | 854.5911   | 6.68          |
|                                | PC 37:6                         | [M-Ac-H]               | 850.5598   | 5.91          |
| PC 38:2                        | [M-Ac-H]                        | 872.6381               | 7.71       |               |

| <b>Lipids in Negative Mode</b> |                      |                        |            |               |
|--------------------------------|----------------------|------------------------|------------|---------------|
| <b>Class</b>                   | <b>Compound name</b> | <b>Type of Adducts</b> | <b>m/z</b> | <b>RT/min</b> |
|                                | PC 38:3              | [M-Ac-H]               | 870.6224   | 7.30          |
|                                | PC 38:4              | [M-Ac-H]               | 868.6068   | 6.92          |
|                                | PC 38:5              | [M-Ac-H]               | 866.5911   | 6.55          |
|                                | PC 38:6              | [M-Ac-H]               | 864.5754   | 6.19          |
|                                | PC 38:7              | [M-Ac-H]               | 862.5598   | 5.65          |
|                                | PC 39:6              | [M-Ac-H]               | 878.5911   | 6.58          |
|                                | PC 40:4              | [M-Ac-H]               | 896.6381   | 7.53          |
|                                | PC 40:5              | [M-Ac-H]               | 894.6224   | 7.21          |
|                                | PC 40:6              | [M-Ac-H]               | 892.6068   | 6.83          |
|                                | PC 40:7              | [M-Ac-H]               | 890.5911   | 6.31          |
|                                | PC 40:8              | [M-Ac-H]               | 888.5754   | 5.90          |
|                                | PC 42:10             | [M-Ac-H]               | 912.5754   | 5.78          |
| PE                             | PE 32:0              | [M-H]                  | 690.5074   | 6.79          |
|                                | PE 32:1              | [M-H]                  | 688.4917   | 6.28          |
|                                | PE 33:0              | [M-H]                  | 704.5231   | 7.08          |
|                                | PE 33:1              | [M-H]                  | 702.5074   | 6.60          |
|                                | PE 34:1              | [M-H]                  | 716.5231   | 6.90          |
|                                | PE 34:2              | [M-H]                  | 714.5074   | 6.43          |
|                                | PE 34:3              | [M-H]                  | 712.4917   | 6.02          |
|                                | PE 35:1              | [M-H]                  | 730.5387   | 7.14          |
|                                | PE 35:2              | [M-H]                  | 728.5231   | 6.77          |
|                                | PE 35:3              | [M-H]                  | 726.5074   | 6.23          |
|                                | PE 35:4              | [M-H]                  | 724.4917   | 6.09          |
|                                | PE 36:0              | [M-H]                  | 746.5700   | 7.92          |
|                                | PE 36:1              | [M-H]                  | 744.5543   | 6.94          |
|                                | PE 36:1              | [M-H]                  | 744.5543   | 7.49          |
|                                | PE 36:2              | [M-H]                  | 742.5387   | 7.06          |
|                                | PE 36:3              | [M-H]                  | 740.5231   | 5.14          |
|                                | PE 36:3              | [M-H]                  | 740.5231   | 6.58          |
|                                | PE 36:4              | [M-H]                  | 738.5074   | 6.26          |
|                                | PE 36:5              | [M-H]                  | 736.4917   | 6.01          |
|                                | PE 37:4              | [M-H]                  | 752.5231   | 6.72          |
|                                | PE 38:2              | [M-H]                  | 770.5700   | 7.51          |
|                                | PE 38:3              | [M-H]                  | 768.5543   | 7.29          |
|                                | PE 38:4              | [M-H]                  | 766.5387   | 6.96          |
|                                | PE 38:5              | [M-H]                  | 764.5231   | 6.56          |
|                                | PE 38:6              | [M-H]                  | 762.5074   | 6.16          |
|                                | PE 40:4              | [M-H]                  | 794.5700   | 7.47          |
|                                | PE 40:5              | [M-H]                  | 792.5543   | 7.20          |
|                                | PE 40:6              | [M-H]                  | 790.5387   | 6.95          |
| PE 40:7                        | [M-H]                | 788.5231               | 6.44       |               |
| PE 40:8                        | [M-H]                | 786.5074               | 6.02       |               |

| <b>Lipids in Negative Mode</b> |                      |                        |            |               |
|--------------------------------|----------------------|------------------------|------------|---------------|
| <b>Class</b>                   | <b>Compound name</b> | <b>Type of Adducts</b> | <b>m/z</b> | <b>RT/min</b> |
| PG                             | PG 33:0              | [M-H]                  | 735.5176   | 6.04          |
|                                | PG 36:0              | [M-H]                  | 777.5646   | 6.88          |
|                                | PG 36:2              | [M-H]                  | 773.5333   | 6.04          |
| PI                             | PI 32:1              | [M-H]                  | 807.5024   | 5.05          |
|                                | PI 34:2              | [M-H]                  | 833.5180   | 5.22          |
|                                | PI 36:2              | [M-H]                  | 861.5493   | 5.87          |
|                                | PI 36:3              | [M-H]                  | 859.5337   | 5.36          |
|                                | PI 36:4              | [M-H]                  | 857.5180   | 5.22          |
|                                | PI 38:3              | [M-H]                  | 887.5649   | 6.04          |
|                                | PI 38:4              | [M-H]                  | 885.5493   | 5.85          |
|                                | PI 38:5              | [M-H]                  | 883.5337   | 5.37          |
| pPE                            | pPE 32:1             | [M-H]                  | 672.4968   | 6.65          |
|                                | pPE 34:1             | [M-H]                  | 700.5281   | 7.25          |
|                                | pPE 34:2             | [M-H]                  | 698.5124   | 6.78          |
|                                | pPE 34:3             | [M-H]                  | 696.4968   | 6.40          |
|                                | pPE 36:1             | [M-H]                  | 728.5594   | 7.81          |
|                                | pPE 36:2             | [M-H]                  | 726.5438   | 7.36          |
|                                | pPE 36:3             | [M-H]                  | 724.5281   | 6.96          |
|                                | pPE 36:4             | [M-H]                  | 722.5124   | 6.72          |
|                                | pPE 36:5             | [M-H]                  | 720.4968   | 6.38          |
|                                | pPE 38:1             | [M-H]                  | 756.5907   | 8.30          |
|                                | pPE 38:2             | [M-H]                  | 754.5751   | 7.97          |
|                                | pPE 38:3             | [M-H]                  | 752.5594   | 7.58          |
|                                | pPE 38:4             | [M-H]                  | 750.5438   | 7.29          |
|                                | pPE 38:5             | [M-H]                  | 748.5281   | 6.80          |
|                                | pPE 38:6             | [M-H]                  | 746.5124   | 6.61          |
|                                | pPE 40:4             | [M-H]                  | 778.5751   | 7.82          |
|                                | pPE 40:5             | [M-H]                  | 776.5594   | 7.43          |
|                                | pPE 40:6             | [M-H]                  | 774.5438   | 7.25          |
|                                | pPE 42:5             | [M-H]                  | 804.5907   | 7.91          |
|                                | pPE 42:6             | [M-H]                  | 802.5751   | 7.80          |
| PS                             | PS 36:1              | [M-H]                  | 788.5442   | 6.43          |
|                                | PS 38:4              | [M-H]                  | 810.5285   | 6.01          |

**Table S2:** Identified lipids by adducts, mass, and retention time in positive and negative modes in post-mortem cohort. The mass accuracy was  $\pm 0.001$  Da in positive mode and  $\pm 0.005$  Da in negative mode, with overall mass error of less than 2 parts per million. AC, acylcarnitine, CE, cholesterol Esters; BMP, bis(monoacylglycero)phosphate; Cer[AS], ceramide class consisting of  $\alpha$ -hydroxy fatty acids and 4-sphingenines; Cer[EOS], omega-acylceramide; Cer[EODS], ceramide class consisting of ester-linked non-hydroxy fatty acids,  $\omega$ -hydroxy fatty acids and 4-sphingenines; Cer[NDS], non-hydroxy fatty acids and sphinganine; Cer[NDS], ceramide class consisting of non-hydroxy fatty acids and sphinganine; Cer[NP], ceramide class consisting of non-hydroxy fatty acids and 4-hydroxysphinganine; Cer[NS], non-hydroxy fatty acids and 4-sphingenine ceramide; DAG, diacylglycerol; GlcCer[NS], ceramide class consisting of non-hydroxy fatty acids and 4-sphingenines; FAHFA, Fatty Acid ester of Hydroxyl Fatty Acid; LPC, lysophosphatidylcholine; LPE, lysophosphatidylethanolamine; PC, phosphatidylcholine; pPC, plasmeyl-phosphatidylcholine; PE, phosphatidylethanolamine; pPE: plasmeyl-phosphatidylethanolamine; PS, phosphatidylserine; PA, phosphatidic acid; SM, sphingomyelin; TAG, triacylglycerol; FFA, free Fatty Acid; PG, phosphatidylglycerol; PI, phosphatidylinositol; x:y, number of carbons:number of double bonds.

| <b>Lipids in Positive Mode (n=606)</b> |                      |                        |            |               |
|----------------------------------------|----------------------|------------------------|------------|---------------|
| <b>Class</b>                           | <b>Compound name</b> | <b>Type of adducts</b> | <b>m/z</b> | <b>RT/min</b> |
| <b>CE</b>                              | CE 16:0              | [M+NH4] <sup>+</sup>   | 642.6189   | 11.00         |
|                                        | CE 16:1              | [M+NH4] <sup>+</sup>   | 640.6033   | 10.69         |
|                                        | CE 18:0              | [M+NH4] <sup>+</sup>   | 670.6502   | 11.38         |
|                                        | CE 18:1              | [M+NH4] <sup>+</sup>   | 668.6345   | 10.99         |
|                                        | CE 18:2              | [M+NH4] <sup>+</sup>   | 666.6189   | 10.81         |
|                                        | CE 18:3              | [M+NH4] <sup>+</sup>   | 664.6033   | 10.55         |
|                                        | CE 18:3              | [M+NH4] <sup>+</sup>   | 664.6033   | 9.31          |
|                                        | CE 20:3              | [M+NH4] <sup>+</sup>   | 692.6345   | 10.81         |
|                                        | CE 20:4              | [M+NH4] <sup>+</sup>   | 690.6189   | 10.63         |
|                                        | CE 20:5              | [M+NH4] <sup>+</sup>   | 688.6033   | 10.42         |
|                                        | CE 22:6              | [M+NH4] <sup>+</sup>   | 714.6189   | 10.53         |
| <b>BMP</b>                             | BMP 34:1             | [M+NH4] <sup>+</sup>   | 766.5593   | 5.67          |
|                                        | BMP 36:2             | [M+NH4] <sup>+</sup>   | 792.5749   | 5.72          |
|                                        | BMP 36:3             | [M+NH4] <sup>+</sup>   | 790.5593   | 5.37          |
|                                        | BMP 36:4             | [M+NH4] <sup>+</sup>   | 788.5436   | 4.91          |
|                                        | BMP 38:4             | [M+NH4] <sup>+</sup>   | 816.5749   | 5.59          |
|                                        | BMP 38:5             | [M+NH4] <sup>+</sup>   | 814.5593   | 5.32          |
|                                        | BMP 38:6             | [M+NH4] <sup>+</sup>   | 812.5436   | 4.86          |
|                                        | BMP 40:6             | [M+NH4] <sup>+</sup>   | 840.5749   | 5.37          |
|                                        | BMP 40:7             | [M+NH4] <sup>+</sup>   | 838.5593   | 5.24          |
|                                        | BMP 40:8             | [M+NH4] <sup>+</sup>   | 836.5436   | 4.78          |
|                                        | BMP 42:10            | [M+NH4] <sup>+</sup>   | 860.5436   | 4.76          |
|                                        | BMP 42:8             | [M+NH4] <sup>+</sup>   | 864.5749   | 5.41          |
|                                        | BMP 42:9             | [M+NH4] <sup>+</sup>   | 862.5593   | 5.01          |

|                 |                    |                      |          |      |
|-----------------|--------------------|----------------------|----------|------|
|                 | BMP 44:10          | [M+NH4] <sup>+</sup> | 888.5749 | 5.27 |
|                 | BMP 44:11          | [M+NH4] <sup>+</sup> | 886.5593 | 5.07 |
|                 | BMP 44:12          | [M+NH4] <sup>+</sup> | 884.5436 | 4.68 |
| <b>Cer[NDS]</b> | Cer[NDS] 34:0      | [M+H] <sup>+</sup>   | 540.5350 | 7.06 |
|                 | Cer[NDS] 36:0      | [M+H] <sup>+</sup>   | 568.5663 | 7.61 |
|                 | Cer[NDS] 38:0      | [M+H] <sup>+</sup>   | 596.5976 | 8.14 |
|                 | Cer[NDS] 40:0      | [M+H] <sup>+</sup>   | 624.6289 | 8.64 |
|                 | Cer[NDS] 41:0      | [M+H] <sup>+</sup>   | 638.6446 | 8.81 |
|                 | Cer[NDS] 42:0      | [M+H] <sup>+</sup>   | 652.6602 | 9.09 |
| <b>Cer[NS]</b>  | Cer[NS] 32:1       | [M+H] <sup>+</sup>   | 510.4881 | 6.22 |
|                 | Cer[NS] 32:2       | [M+H] <sup>+</sup>   | 508.4724 | 5.66 |
|                 | Cer[NS] 33:1       | [M+H] <sup>+</sup>   | 524.5037 | 6.54 |
|                 | Cer[NS] 33:4       | [M+H] <sup>+</sup>   | 518.4568 | 5.44 |
|                 | Cer[NS] 34:1       | [M+H] <sup>+</sup>   | 538.5194 | 6.85 |
|                 | Cer[NS] 34:2       | [M+H] <sup>+</sup>   | 536.5037 | 6.36 |
|                 | Cer[NS] 35:1       | [M+H] <sup>+</sup>   | 552.5350 | 7.19 |
|                 | Cer[NS] 36:1       | [M+H] <sup>+</sup>   | 566.5507 | 7.43 |
|                 | Cer[NS] 36:2       | [M+H] <sup>+</sup>   | 564.5350 | 6.99 |
|                 | Cer[NS] 37:1       | [M+H] <sup>+</sup>   | 580.5663 | 7.74 |
|                 | Cer[NS] 38:1       | [M+H] <sup>+</sup>   | 594.5820 | 7.97 |
|                 | Cer[NS] 38:2       | [M+H] <sup>+</sup>   | 592.5663 | 7.57 |
|                 | Cer[NS] 39:1       | [M+H] <sup>+</sup>   | 608.5976 | 8.28 |
|                 | Cer[NS] 39:2       | [M+H] <sup>+</sup>   | 606.5820 | 7.91 |
|                 | Cer[NS] 40:1       | [M+H] <sup>+</sup>   | 622.6133 | 8.08 |
|                 | Cer[NS] 40:1       | [M+H] <sup>+</sup>   | 622.6133 | 8.47 |
|                 | Cer[NS] 40:2       | [M+H] <sup>+</sup>   | 620.5976 | 8.08 |
|                 | Cer[NS] 41:1       | [M+H] <sup>+</sup>   | 636.6289 | 8.73 |
|                 | Cer[NS] 41:2       | [M+H] <sup>+</sup>   | 634.6133 | 8.29 |
|                 | Cer[NS] 42:1       | [M+H] <sup>+</sup>   | 650.6446 | 8.92 |
|                 | Cer[NS] 42:2       | [M+H] <sup>+</sup>   | 648.6289 | 8.10 |
|                 | Cer[NS] 42:2       | [M+H] <sup>+</sup>   | 648.6289 | 8.51 |
|                 | Cer[NS] 42:3       | [M+H] <sup>+</sup>   | 646.6133 | 8.13 |
|                 | Cer[NS] 42:4       | [M+H] <sup>+</sup>   | 644.5976 | 7.79 |
|                 | Cer[NS] 43:1       | [M+H] <sup>+</sup>   | 664.6602 | 9.09 |
|                 | Cer[NS] 43:2       | [M+H] <sup>+</sup>   | 662.6446 | 8.68 |
|                 | Cer[NS] 44:1       | [M+H] <sup>+</sup>   | 678.6759 | 9.33 |
|                 | Cer[NS] 44:2       | [M+H] <sup>+</sup>   | 676.6602 | 8.92 |
| Cer[NS] 44:3    | [M+H] <sup>+</sup> | 674.6446             | 8.60     |      |
| <b>DAG</b>      | DAG 30:0           | [M+NH4] <sup>+</sup> | 558.5098 | 7.38 |
|                 | DAG 32:0           | [M+NH4] <sup>+</sup> | 586.5411 | 7.94 |
|                 | DAG 32:1           | [M+NH4] <sup>+</sup> | 584.5254 | 7.50 |
|                 | DAG 32:2           | [M+NH4] <sup>+</sup> | 582.5098 | 7.06 |
|                 | DAG 33:0           | [M+NH4] <sup>+</sup> | 600.5567 | 8.17 |

|                   |                 |                      |          |      |
|-------------------|-----------------|----------------------|----------|------|
|                   | DAG 33:1        | [M+NH4] <sup>+</sup> | 598.5411 | 7.75 |
|                   | DAG 34:0        | [M+NH4] <sup>+</sup> | 614.5724 | 8.38 |
|                   | DAG 34:0        | [M+NH4] <sup>+</sup> | 614.5724 | 9.55 |
|                   | DAG 34:1        | [M+NH4] <sup>+</sup> | 612.5567 | 8.00 |
|                   | DAG 34:2        | [M+NH4] <sup>+</sup> | 610.5411 | 7.61 |
|                   | DAG 34:3        | [M+NH4] <sup>+</sup> | 608.5254 | 7.25 |
|                   | DAG 34:4        | [M+NH4] <sup>+</sup> | 606.5098 | 6.89 |
|                   | DAG 35:0        | [M+NH4] <sup>+</sup> | 628.5880 | 8.67 |
|                   | DAG 35:1        | [M+NH4] <sup>+</sup> | 626.5724 | 8.21 |
|                   | DAG 35:2        | [M+NH4] <sup>+</sup> | 624.5567 | 7.87 |
|                   | DAG 36:0        | [M+NH4] <sup>+</sup> | 642.6037 | 8.89 |
|                   | DAG 36:0        | [M+NH4] <sup>+</sup> | 642.6037 | 9.80 |
|                   | DAG 36:1        | [M+NH4] <sup>+</sup> | 640.5880 | 8.48 |
|                   | DAG 36:2        | [M+NH4] <sup>+</sup> | 638.5724 | 8.08 |
|                   | DAG 36:3        | [M+NH4] <sup>+</sup> | 636.5567 | 7.78 |
|                   | DAG 36:4        | [M+NH4] <sup>+</sup> | 634.5411 | 7.47 |
|                   | DAG 36:5        | [M+NH4] <sup>+</sup> | 632.5254 | 6.94 |
|                   | DAG 37:0        | [M+NH4] <sup>+</sup> | 656.6193 | 9.09 |
|                   | DAG 37:4        | [M+NH4] <sup>+</sup> | 648.5567 | 7.86 |
|                   | DAG 38:0        | [M+NH4] <sup>+</sup> | 670.6350 | 9.26 |
|                   | DAG 38:1        | [M+NH4] <sup>+</sup> | 668.6193 | 8.96 |
|                   | DAG 38:2        | [M+NH4] <sup>+</sup> | 666.6037 | 8.57 |
|                   | DAG 38:3        | [M+NH4] <sup>+</sup> | 664.5880 | 8.28 |
|                   | DAG 38:4        | [M+NH4] <sup>+</sup> | 662.5724 | 8.00 |
|                   | DAG 38:5        | [M+NH4] <sup>+</sup> | 660.5567 | 7.63 |
|                   | DAG 38:6        | [M+NH4] <sup>+</sup> | 658.5411 | 7.45 |
|                   | DAG 39:0        | [M+NH4] <sup>+</sup> | 684.6506 | 9.46 |
|                   | DAG 40:0        | [M+NH4] <sup>+</sup> | 698.6662 | 9.62 |
|                   | DAG 40:4        | [M+NH4] <sup>+</sup> | 690.6037 | 8.48 |
|                   | DAG 40:5        | [M+NH4] <sup>+</sup> | 688.5880 | 8.18 |
|                   | DAG 40:6        | [M+NH4] <sup>+</sup> | 686.5724 | 7.96 |
|                   | DAG 40:7        | [M+NH4] <sup>+</sup> | 684.5567 | 7.50 |
|                   | DAG 41:0        | [M+NH4] <sup>+</sup> | 712.6819 | 9.77 |
|                   | DAG 42:0        | [M+NH4] <sup>+</sup> | 726.6975 | 9.93 |
|                   | DAG 42:10       | [M+NH4] <sup>+</sup> | 706.5411 | 7.06 |
|                   | DAG 42:7        | [M+NH4] <sup>+</sup> | 712.5880 | 8.06 |
|                   | DAG 42:8        | [M+NH4] <sup>+</sup> | 710.5724 | 7.66 |
|                   | DAG 42:9        | [M+NH4] <sup>+</sup> | 708.5567 | 7.35 |
|                   | DAG 44:12       | [M+NH4] <sup>+</sup> | 730.5411 | 6.98 |
| <b>GlcCer[NS]</b> | GlcCer[NS] 34:1 | [M+H] <sup>+</sup>   | 700.5727 | 6.19 |
|                   | GlcCer[NS] 34:2 | [M+H] <sup>+</sup>   | 698.5571 | 5.64 |
|                   | GlcCer[NS] 35:1 | [M+H] <sup>+</sup>   | 714.5884 | 6.50 |
|                   | GlcCer[NS] 36:1 | [M+H] <sup>+</sup>   | 728.6040 | 6.82 |

|            |                    |                    |          |      |
|------------|--------------------|--------------------|----------|------|
|            | GlcCer[NS] 36:2    | [M+H] <sup>+</sup> | 726.5884 | 6.36 |
|            | GlcCer[NS] 40:1    | [M+H] <sup>+</sup> | 784.6666 | 7.93 |
|            | GlcCer[NS] 40:2    | [M+H] <sup>+</sup> | 782.6510 | 7.48 |
|            | GlcCer[NS] 41:1    | [M+H] <sup>+</sup> | 798.6823 | 8.17 |
|            | GlcCer[NS] 41:2    | [M+H] <sup>+</sup> | 796.6666 | 8.02 |
|            | GlcCer[NS] 42:1    | [M+H] <sup>+</sup> | 812.6979 | 8.42 |
|            | GlcCer[NS] 42:2    | [M+H] <sup>+</sup> | 810.6823 | 7.98 |
|            | GlcCer[NS] 42:3    | [M+H] <sup>+</sup> | 808.6666 | 7.52 |
|            | GlcCer[NS] 43:1    | [M+H] <sup>+</sup> | 826.7136 | 8.60 |
|            | GlcCer[NS] 44:1    | [M+H] <sup>+</sup> | 840.7292 | 8.83 |
| <b>LPC</b> | LPC 14:0           | [M+H] <sup>+</sup> | 468.3090 | 1.06 |
|            | LPC 15:0           | [M+H] <sup>+</sup> | 482.3247 | 1.19 |
|            | LPC 16:0           | [M+H] <sup>+</sup> | 496.3403 | 1.65 |
|            | LPC 16:0           | [M+H] <sup>+</sup> | 496.3403 | 3.45 |
|            | LPC 16:1           | [M+H] <sup>+</sup> | 494.3247 | 1.19 |
|            | LPC 17:0           | [M+H] <sup>+</sup> | 510.3560 | 1.98 |
|            | LPC 17:1           | [M+H] <sup>+</sup> | 508.3403 | 1.44 |
|            | LPC 18:0           | [M+H] <sup>+</sup> | 524.3716 | 2.40 |
|            | LPC 18:1           | [M+H] <sup>+</sup> | 522.3560 | 1.85 |
|            | LPC 18:2           | [M+H] <sup>+</sup> | 520.3403 | 1.30 |
|            | LPC 18:3           | [M+H] <sup>+</sup> | 518.3247 | 1.08 |
|            | LPC 19:0           | [M+H] <sup>+</sup> | 538.3873 | 2.83 |
|            | LPC 19:1           | [M+H] <sup>+</sup> | 536.3716 | 2.18 |
|            | LPC 20:0           | [M+H] <sup>+</sup> | 552.4029 | 3.26 |
|            | LPC 20:1           | [M+H] <sup>+</sup> | 550.3873 | 2.54 |
|            | LPC 20:2           | [M+H] <sup>+</sup> | 548.3716 | 1.92 |
|            | LPC 20:4           | [M+H] <sup>+</sup> | 544.3403 | 1.28 |
|            | LPC 20:5           | [M+H] <sup>+</sup> | 542.3247 | 1.06 |
|            | LPC 22:0           | [M+H] <sup>+</sup> | 580.4342 | 4.25 |
|            | LPC 22:4           | [M+H] <sup>+</sup> | 572.3716 | 1.77 |
|            | LPC 22:5           | [M+H] <sup>+</sup> | 570.3560 | 1.46 |
|            | LPC 22:6           | [M+H] <sup>+</sup> | 568.3403 | 1.24 |
|            | LPC 24:0           | [M+H] <sup>+</sup> | 608.4655 | 5.12 |
| LPC 24:1   | [M+H] <sup>+</sup> | 606.4499           | 4.28     |      |
| LPC 26:0   | [M+H] <sup>+</sup> | 636.4968           | 5.92     |      |
| <b>LPE</b> | LPE 16:0           | [M+H] <sup>+</sup> | 454.2934 | 1.71 |
|            | LPE 18:0           | [M+H] <sup>+</sup> | 482.3247 | 2.49 |
|            | LPE 18:1           | [M+H] <sup>+</sup> | 480.3090 | 1.80 |
|            | LPE 18:2           | [M+H] <sup>+</sup> | 478.2934 | 1.33 |
|            | LPE 20:4           | [M+H] <sup>+</sup> | 502.2934 | 1.31 |
|            | LPE 20:4           | [M+H] <sup>+</sup> | 502.2934 | 7.30 |
|            | LPE 22:4           | [M+H] <sup>+</sup> | 530.3247 | 1.89 |
|            | LPE 22:5           | [M+H] <sup>+</sup> | 528.3090 | 1.53 |

|         |                    |                    |          |      |
|---------|--------------------|--------------------|----------|------|
|         | LPE 22:6           | [M+H] <sup>+</sup> | 526.2934 | 1.27 |
| PC      | PC 26:0            | [M+H] <sup>+</sup> | 650.4761 | 4.45 |
|         | PC 28:0            | [M+H] <sup>+</sup> | 678.5074 | 5.18 |
|         | PC 28:2            | [M+H] <sup>+</sup> | 674.4761 | 4.41 |
|         | PC 29:0            | [M+H] <sup>+</sup> | 692.5230 | 5.47 |
|         | PC 29:1            | [M+H] <sup>+</sup> | 690.5074 | 5.20 |
|         | PC 30:0            | [M+H] <sup>+</sup> | 706.5387 | 5.83 |
|         | PC 30:2            | [M+H] <sup>+</sup> | 702.5074 | 5.06 |
|         | PC 30:3            | [M+H] <sup>+</sup> | 700.4917 | 4.74 |
|         | PC 31:0            | [M+H] <sup>+</sup> | 720.5543 | 6.11 |
|         | PC 31:1            | [M+H] <sup>+</sup> | 718.5387 | 5.87 |
|         | PC 31:2            | [M+H] <sup>+</sup> | 716.5230 | 5.46 |
|         | PC 32:0            | [M+H] <sup>+</sup> | 734.5700 | 5.41 |
|         | PC 32:0            | [M+H] <sup>+</sup> | 734.5700 | 6.45 |
|         | PC 32:1            | [M+H] <sup>+</sup> | 732.5543 | 5.99 |
|         | PC 32:2            | [M+H] <sup>+</sup> | 730.5387 | 5.82 |
|         | PC 32:3            | [M+H] <sup>+</sup> | 728.5230 | 5.11 |
|         | PC 32:4            | [M+H] <sup>+</sup> | 726.5074 | 4.83 |
|         | PC 32:6            | [M+H] <sup>+</sup> | 722.4761 | 4.18 |
|         | PC 33:0            | [M+H] <sup>+</sup> | 748.5856 | 6.75 |
|         | PC 33:2            | [M+H] <sup>+</sup> | 744.5543 | 5.79 |
|         | PC 33:3            | [M+H] <sup>+</sup> | 742.5387 | 5.58 |
|         | PC 34:0            | [M+H] <sup>+</sup> | 762.6013 | 7.07 |
|         | PC 34:1            | [M+H] <sup>+</sup> | 760.5856 | 4.81 |
|         | PC 34:2            | [M+H] <sup>+</sup> | 758.5700 | 6.16 |
|         | PC 34:3            | [M+H] <sup>+</sup> | 756.5543 | 4.23 |
|         | PC 34:3            | [M+H] <sup>+</sup> | 756.5543 | 5.89 |
|         | PC 34:4            | [M+H] <sup>+</sup> | 754.5387 | 5.31 |
|         | PC 34:5            | [M+H] <sup>+</sup> | 752.5230 | 5.14 |
|         | PC 34:6            | [M+H] <sup>+</sup> | 750.5074 | 4.73 |
|         | PC 35:0            | [M+H] <sup>+</sup> | 776.6169 | 7.42 |
|         | PC 35:2            | [M+H] <sup>+</sup> | 772.5856 | 6.45 |
|         | PC 35:2            | [M+H] <sup>+</sup> | 772.5856 | 7.52 |
|         | PC 35:3            | [M+H] <sup>+</sup> | 770.5700 | 6.13 |
| PC 35:4 | [M+H] <sup>+</sup> | 768.5543           | 5.86     |      |
| PC 35:5 | [M+H] <sup>+</sup> | 766.5387           | 5.48     |      |
| PC 35:6 | [M+H] <sup>+</sup> | 764.5230           | 6.04     |      |
| PC 35:7 | [M+H] <sup>+</sup> | 762.5074           | 5.58     |      |
| PC 36:0 | [M+H] <sup>+</sup> | 790.6326           | 7.66     |      |
| PC 36:1 | [M+H] <sup>+</sup> | 788.6169           | 7.18     |      |
| PC 36:1 | [M+H] <sup>+</sup> | 788.6169           | 9.27     |      |
| PC 36:2 | [M+H] <sup>+</sup> | 786.6013           | 6.74     |      |
| PC 36:3 | [M+H] <sup>+</sup> | 784.5856           | 6.36     |      |



|          |                    |          |      |
|----------|--------------------|----------|------|
| PC 36:4  | [M+H] <sup>+</sup> | 782.5700 | 4.50 |
| PC 36:5  | [M+H] <sup>+</sup> | 780.5543 | 4.51 |
| PC 36:6  | [M+H] <sup>+</sup> | 778.5387 | 5.39 |
| PC 36:7  | [M+H] <sup>+</sup> | 776.5230 | 4.92 |
| PC 37:1  | [M+H] <sup>+</sup> | 802.6326 | 7.51 |
| PC 37:2  | [M+H] <sup>+</sup> | 800.6169 | 7.02 |
| PC 37:3  | [M+H] <sup>+</sup> | 798.6013 | 6.76 |
| PC 37:4  | [M+H] <sup>+</sup> | 796.5856 | 6.35 |
| PC 37:5  | [M+H] <sup>+</sup> | 794.5700 | 6.02 |
| PC 37:6  | [M+H] <sup>+</sup> | 792.5543 | 5.75 |
| PC 38:0  | [M+H] <sup>+</sup> | 818.6639 | 8.15 |
| PC 38:1  | [M+H] <sup>+</sup> | 816.6482 | 7.75 |
| PC 38:2  | [M+H] <sup>+</sup> | 814.6326 | 7.33 |
| PC 38:3  | [M+H] <sup>+</sup> | 812.6169 | 7.00 |
| PC 38:4  | [M+H] <sup>+</sup> | 810.6013 | 5.36 |
| PC 38:4  | [M+H] <sup>+</sup> | 810.6013 | 6.82 |
| PC 38:5  | [M+H] <sup>+</sup> | 808.5856 | 6.31 |
| PC 38:6  | [M+H] <sup>+</sup> | 806.5700 | 6.04 |
| PC 38:7  | [M+H] <sup>+</sup> | 804.5543 | 5.59 |
| PC 38:8  | [M+H] <sup>+</sup> | 802.5387 | 5.25 |
| PC 38:9  | [M+H] <sup>+</sup> | 800.5230 | 4.89 |
| PC 39:1  | [M+H] <sup>+</sup> | 830.6639 | 7.69 |
| PC 39:2  | [M+H] <sup>+</sup> | 828.6482 | 7.57 |
| PC 39:4  | [M+H] <sup>+</sup> | 824.6169 | 7.08 |
| PC 39:5  | [M+H] <sup>+</sup> | 822.6013 | 6.05 |
| PC 39:6  | [M+H] <sup>+</sup> | 820.5856 | 6.30 |
| PC 39:7  | [M+H] <sup>+</sup> | 818.5700 | 5.90 |
| PC 40:0  | [M+H] <sup>+</sup> | 846.6952 | 8.62 |
| PC 40:1  | [M+H] <sup>+</sup> | 844.6795 | 8.18 |
| PC 40:10 | [M+H] <sup>+</sup> | 826.5387 | 5.01 |
| PC 40:2  | [M+H] <sup>+</sup> | 842.6639 | 7.83 |
| PC 40:3  | [M+H] <sup>+</sup> | 840.6482 | 7.53 |
| PC 40:6  | [M+H] <sup>+</sup> | 834.6013 | 6.71 |
| PC 40:7  | [M+H] <sup>+</sup> | 832.5856 | 6.18 |
| PC 40:8  | [M+H] <sup>+</sup> | 830.5700 | 5.61 |
| PC 41:1  | [M+H] <sup>+</sup> | 858.6952 | 8.48 |
| PC 41:6  | [M+H] <sup>+</sup> | 848.6169 | 7.02 |
| PC 41:7  | [M+H] <sup>+</sup> | 846.6013 | 6.49 |
| PC 42:1  | [M+H] <sup>+</sup> | 872.7108 | 8.61 |
| PC 42:10 | [M+H] <sup>+</sup> | 854.5700 | 5.66 |
| PC 42:11 | [M+H] <sup>+</sup> | 852.5543 | 5.27 |
| PC 42:2  | [M+H] <sup>+</sup> | 870.6952 | 8.35 |
| PC 42:3  | [M+H] <sup>+</sup> | 868.6795 | 7.92 |

|           |          |                    |           |       |
|-----------|----------|--------------------|-----------|-------|
|           | PC 42:4  | [M+H] <sup>+</sup> | 866.6639  | 7.51  |
|           | PC 42:5  | [M+H] <sup>+</sup> | 864.6482  | 7.64  |
|           | PC 42:6  | [M+H] <sup>+</sup> | 862.6326  | 6.89  |
|           | PC 42:7  | [M+H] <sup>+</sup> | 860.6169  | 6.61  |
|           | PC 42:9  | [M+H] <sup>+</sup> | 856.5856  | 5.94  |
|           | PC 44:1  | [M+H] <sup>+</sup> | 900.7421  | 9.07  |
|           | PC 44:10 | [M+H] <sup>+</sup> | 882.6013  | 6.20  |
|           | PC 44:11 | [M+H] <sup>+</sup> | 880.5856  | 5.95  |
|           | PC 44:12 | [M+H] <sup>+</sup> | 878.5700  | 5.56  |
|           | PC 44:2  | [M+H] <sup>+</sup> | 898.7265  | 8.72  |
|           | PC 44:3  | [M+H] <sup>+</sup> | 896.7108  | 8.39  |
|           | PC 44:4  | [M+H] <sup>+</sup> | 894.6952  | 8.08  |
|           | PC 44:5  | [M+H] <sup>+</sup> | 892.6795  | 7.66  |
|           | PC 44:6  | [M+H] <sup>+</sup> | 890.6639  | 7.71  |
|           | PC 44:7  | [M+H] <sup>+</sup> | 888.6482  | 7.36  |
|           | PC 44:8  | [M+H] <sup>+</sup> | 886.6326  | 6.82  |
|           | PC 44:9  | [M+H] <sup>+</sup> | 884.6169  | 6.45  |
|           | PC 46:0  | [M+H] <sup>+</sup> | 930.7891  | 9.74  |
|           | PC 46:1  | [M+H] <sup>+</sup> | 928.7734  | 9.41  |
|           | PC 46:10 | [M+H] <sup>+</sup> | 910.6326  | 6.68  |
|           | PC 46:2  | [M+H] <sup>+</sup> | 926.7578  | 9.11  |
|           | PC 46:4  | [M+H] <sup>+</sup> | 922.7265  | 8.45  |
|           | PC 46:5  | [M+H] <sup>+</sup> | 920.7108  | 8.15  |
|           | PC 46:6  | [M+H] <sup>+</sup> | 918.6952  | 7.80  |
|           | PC 46:6  | [M+H] <sup>+</sup> | 918.6952  | 8.32  |
|           | PC 46:7  | [M+H] <sup>+</sup> | 916.6795  | 7.77  |
|           | PC 46:8  | [M+H] <sup>+</sup> | 914.6639  | 7.28  |
|           | PC 46:9  | [M+H] <sup>+</sup> | 912.6482  | 7.03  |
|           | PC 48:2  | [M+H] <sup>+</sup> | 954.7891  | 9.50  |
|           | PC 48:3  | [M+H] <sup>+</sup> | 952.7734  | 9.18  |
|           | PC 48:7  | [M+H] <sup>+</sup> | 944.7108  | 8.10  |
|           | PC 48:8  | [M+H] <sup>+</sup> | 942.6952  | 7.85  |
|           | PC 48:9  | [M+H] <sup>+</sup> | 940.6795  | 7.54  |
|           | PC 49:4  | [M+H] <sup>+</sup> | 964.7734  | 9.03  |
|           | PC 50:1  | [M+H] <sup>+</sup> | 984.8360  | 10.04 |
|           | PC 50:2  | [M+H] <sup>+</sup> | 982.8204  | 9.80  |
|           | PC 50:3  | [M+H] <sup>+</sup> | 980.8047  | 9.51  |
|           | PC 50:4  | [M+H] <sup>+</sup> | 978.7891  | 9.13  |
|           | PC 50:8  | [M+H] <sup>+</sup> | 970.7265  | 8.03  |
|           | PC 52:1  | [M+H] <sup>+</sup> | 1012.8670 | 10.35 |
|           | PC 52:5  | [M+H] <sup>+</sup> | 1004.8050 | 9.26  |
|           | PC 52:8  | [M+H] <sup>+</sup> | 998.7578  | 8.48  |
| <b>PE</b> | PE 32:0  | [M+H] <sup>+</sup> | 692.5230  | 6.72  |

|          |                    |          |      |
|----------|--------------------|----------|------|
| PE 32:1  | [M+H] <sup>+</sup> | 690.5074 | 6.20 |
| PE 32:2  | [M+H] <sup>+</sup> | 688.4917 | 5.69 |
| PE 32:3  | [M+H] <sup>+</sup> | 686.4761 | 5.65 |
| PE 33:1  | [M+H] <sup>+</sup> | 704.5230 | 6.56 |
| PE 34:1  | [M+H] <sup>+</sup> | 718.5387 | 6.81 |
| PE 34:2  | [M+H] <sup>+</sup> | 716.5230 | 6.37 |
| PE 34:3  | [M+H] <sup>+</sup> | 714.5074 | 5.90 |
| PE 35:1  | [M+H] <sup>+</sup> | 732.5543 | 7.09 |
| PE 36:0  | [M+H] <sup>+</sup> | 748.5856 | 7.81 |
| PE 36:1  | [M+H] <sup>+</sup> | 746.5700 | 7.39 |
| PE 36:2  | [M+H] <sup>+</sup> | 744.5543 | 6.93 |
| PE 36:3  | [M+H] <sup>+</sup> | 742.5387 | 6.54 |
| PE 36:4  | [M+H] <sup>+</sup> | 740.5230 | 6.38 |
| PE 36:5  | [M+H] <sup>+</sup> | 738.5074 | 5.84 |
| PE 36:6  | [M+H] <sup>+</sup> | 736.4917 | 5.59 |
| PE 37:4  | [M+H] <sup>+</sup> | 754.5387 | 6.67 |
| PE 38:1  | [M+H] <sup>+</sup> | 774.6013 | 7.88 |
| PE 38:2  | [M+H] <sup>+</sup> | 772.5856 | 7.45 |
| PE 38:3  | [M+H] <sup>+</sup> | 770.5700 | 7.20 |
| PE 38:4  | [M+H] <sup>+</sup> | 768.5543 | 6.89 |
| PE 38:5  | [M+H] <sup>+</sup> | 766.5387 | 6.47 |
| PE 38:6  | [M+H] <sup>+</sup> | 764.5230 | 6.19 |
| PE 38:7  | [M+H] <sup>+</sup> | 762.5074 | 5.72 |
| PE 39:6  | [M+H] <sup>+</sup> | 778.5387 | 6.47 |
| PE 40:1  | [M+H] <sup>+</sup> | 802.6326 | 8.38 |
| PE 40:2  | [M+H] <sup>+</sup> | 800.6169 | 7.93 |
| PE 40:4  | [M+H] <sup>+</sup> | 796.5856 | 7.38 |
| PE 40:5  | [M+H] <sup>+</sup> | 794.5700 | 7.07 |
| PE 40:6  | [M+H] <sup>+</sup> | 792.5543 | 6.82 |
| PE 40:7  | [M+H] <sup>+</sup> | 790.5387 | 6.33 |
| PE 40:8  | [M+H] <sup>+</sup> | 788.5230 | 5.93 |
| PE 40:9  | [M+H] <sup>+</sup> | 786.5074 | 5.55 |
| PE 41:6  | [M+H] <sup>+</sup> | 806.5700 | 7.17 |
| PE 42:1  | [M+H] <sup>+</sup> | 830.6639 | 8.83 |
| PE 42:10 | [M+H] <sup>+</sup> | 812.5230 | 5.84 |
| PE 42:11 | [M+H] <sup>+</sup> | 810.5074 | 5.42 |
| PE 42:2  | [M+H] <sup>+</sup> | 828.6482 | 8.40 |
| PE 42:4  | [M+H] <sup>+</sup> | 824.6169 | 7.86 |
| PE 42:6  | [M+H] <sup>+</sup> | 820.5856 | 7.45 |
| PE 42:7  | [M+H] <sup>+</sup> | 818.5700 | 6.95 |
| PE 42:8  | [M+H] <sup>+</sup> | 816.5543 | 6.50 |
| PE 42:9  | [M+H] <sup>+</sup> | 814.5387 | 6.15 |
| PE 44:10 | [M+H] <sup>+</sup> | 840.5543 | 6.37 |

|           |                    |                                   |                    |          |
|-----------|--------------------|-----------------------------------|--------------------|----------|
|           | PE 44:12           | [M+H] <sup>+</sup>                | 836.5230           | 5.72     |
|           | PE 44:9            | [M+H] <sup>+</sup>                | 842.5700           | 6.75     |
| <b>PG</b> | PG 34:0            | [M+NH <sub>4</sub> ] <sup>+</sup> | 768.5749           | 6.51     |
|           | PG 34:1            | [M+NH <sub>4</sub> ] <sup>+</sup> | 766.5593           | 5.98     |
|           | PG 34:2            | [M+NH <sub>4</sub> ] <sup>+</sup> | 764.5436           | 5.59     |
|           | PG 36:0            | [M+NH <sub>4</sub> ] <sup>+</sup> | 796.6062           | 7.07     |
|           | PG 36:4            | [M+NH <sub>4</sub> ] <sup>+</sup> | 788.5436           | 5.61     |
|           | <b>pPC</b>         | pPC 24:0                          | [M+H] <sup>+</sup> | 606.4499 |
| pPC 29:1  |                    | [M+H] <sup>+</sup>                | 674.5125           | 5.15     |
| pPC 30:0  |                    | [M+H] <sup>+</sup>                | 690.5438           | 6.23     |
| pPC 31:0  |                    | [M+H] <sup>+</sup>                | 704.5594           | 6.53     |
| pPC 32:0  |                    | [M+H] <sup>+</sup>                | 718.5751           | 6.82     |
| pPC 32:1  |                    | [M+H] <sup>+</sup>                | 716.5594           | 5.97     |
| pPC 32:2  |                    | [M+H] <sup>+</sup>                | 714.5438           | 5.90     |
| pPC 32:3  |                    | [M+H] <sup>+</sup>                | 712.5281           | 5.54     |
| pPC 32:4  |                    | [M+H] <sup>+</sup>                | 710.5125           | 5.21     |
| pPC 32:5  |                    | [M+H] <sup>+</sup>                | 708.4968           | 4.62     |
| pPC 33:5  |                    | [M+H] <sup>+</sup>                | 722.5125           | 6.21     |
| pPC 34:0  |                    | [M+H] <sup>+</sup>                | 746.6064           | 7.00     |
| pPC 34:1  |                    | [M+H] <sup>+</sup>                | 744.5907           | 6.58     |
| pPC 34:2  |                    | [M+H] <sup>+</sup>                | 742.5751           | 6.37     |
| pPC 34:3  |                    | [M+H] <sup>+</sup>                | 740.5594           | 5.94     |
| pPC 34:4  |                    | [M+H] <sup>+</sup>                | 738.5438           | 5.83     |
| pPC 34:5  |                    | [M+H] <sup>+</sup>                | 736.5281           | 5.36     |
| pPC 35:0  |                    | [M+H] <sup>+</sup>                | 760.6220           | 6.20     |
| pPC 35:1  |                    | [M+H] <sup>+</sup>                | 758.6064           | 7.31     |
| pPC 35:3  |                    | [M+H] <sup>+</sup>                | 754.5751           | 6.27     |
| pPC 35:4  |                    | [M+H] <sup>+</sup>                | 752.5594           | 5.10     |
| pPC 36:0  |                    | [M+H] <sup>+</sup>                | 774.6377           | 7.45     |
| pPC 36:1  |                    | [M+H] <sup>+</sup>                | 772.6220           | 7.19     |
| pPC 36:2  |                    | [M+H] <sup>+</sup>                | 770.6064           | 6.89     |
| pPC 36:3  |                    | [M+H] <sup>+</sup>                | 768.5907           | 6.54     |
| pPC 36:4  |                    | [M+H] <sup>+</sup>                | 766.5751           | 6.44     |
| pPC 36:5  |                    | [M+H] <sup>+</sup>                | 764.5594           | 6.06     |
| pPC 36:6  |                    | [M+H] <sup>+</sup>                | 762.5438           | 6.84     |
| pPC 37:0  |                    | [M+H] <sup>+</sup>                | 788.6533           | 6.79     |
| pPC 37:1  |                    | [M+H] <sup>+</sup>                | 786.6377           | 8.61     |
| pPC 37:3  |                    | [M+H] <sup>+</sup>                | 782.6064           | 6.90     |
| pPC 37:4  |                    | [M+H] <sup>+</sup>                | 780.5907           | 6.73     |
| pPC 37:6  |                    | [M+H] <sup>+</sup>                | 776.5594           | 6.92     |
| pPC 38:2  |                    | [M+H] <sup>+</sup>                | 798.6377           | 7.38     |
| pPC 38:3  | [M+H] <sup>+</sup> | 796.6220                          | 6.97               |          |
| pPC 38:3  | [M+H] <sup>+</sup> | 796.6220                          | 7.20               |          |

|            |          |                    |          |      |
|------------|----------|--------------------|----------|------|
|            | pPC 38:4 | [M+H] <sup>+</sup> | 794.6064 | 6.87 |
|            | pPC 38:5 | [M+H] <sup>+</sup> | 792.5907 | 6.37 |
|            | pPC 38:6 | [M+H] <sup>+</sup> | 790.5751 | 6.36 |
|            | pPC 39:4 | [M+H] <sup>+</sup> | 808.6220 | 6.06 |
|            | pPC 39:6 | [M+H] <sup>+</sup> | 804.5907 | 6.64 |
|            | pPC 40:2 | [M+H] <sup>+</sup> | 826.6690 | 7.47 |
|            | pPC 40:3 | [M+H] <sup>+</sup> | 824.6533 | 7.58 |
|            | pPC 40:4 | [M+H] <sup>+</sup> | 822.6377 | 7.28 |
|            | pPC 40:5 | [M+H] <sup>+</sup> | 820.6220 | 7.00 |
|            | pPC 40:6 | [M+H] <sup>+</sup> | 818.6064 | 6.54 |
|            | pPC 41:4 | [M+H] <sup>+</sup> | 836.6533 | 6.75 |
|            | pPC 42:1 | [M+H] <sup>+</sup> | 856.7159 | 8.64 |
|            | pPC 42:2 | [M+H] <sup>+</sup> | 854.7003 | 8.47 |
|            | pPC 42:3 | [M+H] <sup>+</sup> | 852.6846 | 8.24 |
|            | pPC 42:5 | [M+H] <sup>+</sup> | 848.6533 | 7.37 |
|            | pPC 42:6 | [M+H] <sup>+</sup> | 846.6377 | 6.94 |
|            | pPC 43:4 | [M+H] <sup>+</sup> | 864.6846 | 7.99 |
|            | pPC 44:3 | [M+H] <sup>+</sup> | 880.7159 | 8.64 |
|            | pPC 44:4 | [M+H] <sup>+</sup> | 878.7003 | 8.19 |
|            | pPC 44:5 | [M+H] <sup>+</sup> | 876.6846 | 8.16 |
|            | pPC 44:6 | [M+H] <sup>+</sup> | 874.6690 | 7.59 |
|            | pPC 46:4 | [M+H] <sup>+</sup> | 906.7316 | 8.52 |
| <b>pPE</b> | pPE 32:0 | [M+H] <sup>+</sup> | 676.5281 | 7.06 |
|            | pPE 32:1 | [M+H] <sup>+</sup> | 674.5125 | 6.56 |
|            | pPE 34:0 | [M+H] <sup>+</sup> | 704.5594 | 7.59 |
|            | pPE 34:1 | [M+H] <sup>+</sup> | 702.5438 | 7.10 |
|            | pPE 34:2 | [M+H] <sup>+</sup> | 700.5281 | 6.73 |
|            | pPE 35:1 | [M+H] <sup>+</sup> | 716.5594 | 7.42 |
|            | pPE 36:0 | [M+H] <sup>+</sup> | 732.5907 | 8.13 |
|            | pPE 36:1 | [M+H] <sup>+</sup> | 730.5751 | 7.65 |
|            | pPE 36:2 | [M+H] <sup>+</sup> | 728.5594 | 7.30 |
|            | pPE 36:3 | [M+H] <sup>+</sup> | 726.5438 | 6.86 |
|            | pPE 36:4 | [M+H] <sup>+</sup> | 724.5281 | 6.67 |
|            | pPE 36:5 | [M+H] <sup>+</sup> | 722.5125 | 6.31 |
|            | pPE 37:4 | [M+H] <sup>+</sup> | 738.5438 | 6.95 |
|            | pPE 38:2 | [M+H] <sup>+</sup> | 756.5907 | 7.84 |
|            | pPE 38:3 | [M+H] <sup>+</sup> | 754.5751 | 7.43 |
|            | pPE 38:4 | [M+H] <sup>+</sup> | 752.5594 | 7.22 |
|            | pPE 38:5 | [M+H] <sup>+</sup> | 750.5438 | 6.70 |
|            | pPE 38:6 | [M+H] <sup>+</sup> | 748.5281 | 6.55 |
|            | pPE 39:5 | [M+H] <sup>+</sup> | 764.5594 | 6.98 |
|            | pPE 40:4 | [M+H] <sup>+</sup> | 780.5907 | 7.65 |
|            | pPE 40:5 | [M+H] <sup>+</sup> | 778.5751 | 7.36 |

|           |                    |                    |          |      |
|-----------|--------------------|--------------------|----------|------|
|           | pPE 40:6           | [M+H] <sup>+</sup> | 776.5594 | 7.17 |
|           | pPE 42:4           | [M+H] <sup>+</sup> | 808.6220 | 8.02 |
|           | pPE 42:5           | [M+H] <sup>+</sup> | 806.6064 | 7.86 |
|           | pPE 42:6           | [M+H] <sup>+</sup> | 804.5907 | 7.71 |
| <b>PS</b> | PS 34:0            | [M+H] <sup>+</sup> | 764.5441 | 6.53 |
|           | PS 34:1            | [M+H] <sup>+</sup> | 762.5285 | 5.94 |
|           | PS 34:2            | [M+H] <sup>+</sup> | 760.5128 | 5.53 |
|           | PS 35:1            | [M+H] <sup>+</sup> | 776.5441 | 6.25 |
|           | PS 36:1            | [M+H] <sup>+</sup> | 790.5598 | 6.59 |
|           | PS 36:2            | [M+H] <sup>+</sup> | 788.5441 | 6.17 |
|           | PS 36:3            | [M+H] <sup>+</sup> | 786.5285 | 5.82 |
|           | PS 36:4            | [M+H] <sup>+</sup> | 784.5128 | 5.47 |
|           | PS 38:1            | [M+H] <sup>+</sup> | 818.5911 | 7.15 |
|           | PS 38:2            | [M+H] <sup>+</sup> | 816.5755 | 6.79 |
|           | PS 38:3            | [M+H] <sup>+</sup> | 814.5598 | 6.39 |
|           | PS 38:4            | [M+H] <sup>+</sup> | 812.5441 | 6.12 |
|           | PS 38:5            | [M+H] <sup>+</sup> | 810.5285 | 5.63 |
|           | PS 38:6            | [M+H] <sup>+</sup> | 808.5128 | 5.37 |
|           | PS 39:6            | [M+H] <sup>+</sup> | 822.5285 | 5.72 |
|           | PS 40:1            | [M+H] <sup>+</sup> | 846.6224 | 7.83 |
|           | PS 40:2            | [M+H] <sup>+</sup> | 844.6068 | 7.29 |
|           | PS 40:4            | [M+H] <sup>+</sup> | 840.5755 | 6.52 |
|           | PS 40:5            | [M+H] <sup>+</sup> | 838.5598 | 6.38 |
|           | PS 40:6            | [M+H] <sup>+</sup> | 836.5441 | 4.01 |
|           | PS 40:7            | [M+H] <sup>+</sup> | 834.5285 | 5.46 |
|           | PS 40:8            | [M+H] <sup>+</sup> | 832.5128 | 5.04 |
|           | PS 42:1            | [M+H] <sup>+</sup> | 874.6537 | 8.29 |
|           | PS 42:10           | [M+H] <sup>+</sup> | 856.5128 | 4.97 |
|           | PS 42:11           | [M+H] <sup>+</sup> | 854.4972 | 4.57 |
|           | PS 42:2            | [M+H] <sup>+</sup> | 872.6381 | 7.83 |
|           | PS 42:5            | [M+H] <sup>+</sup> | 866.5911 | 6.79 |
|           | PS 42:6            | [M+H] <sup>+</sup> | 864.5755 | 6.72 |
|           | PS 42:7            | [M+H] <sup>+</sup> | 862.5598 | 6.03 |
|           | PS 42:8            | [M+H] <sup>+</sup> | 860.5441 | 5.63 |
|           | PS 42:9            | [M+H] <sup>+</sup> | 858.5285 | 5.25 |
|           | PS 44:10           | [M+H] <sup>+</sup> | 884.5441 | 5.45 |
|           | PS 44:11           | [M+H] <sup>+</sup> | 882.5285 | 5.15 |
| PS 44:12  | [M+H] <sup>+</sup> | 880.5128           | 4.86     |      |
| PS 44:7   | [M+H] <sup>+</sup> | 890.5911           | 6.79     |      |
| PS 44:9   | [M+H] <sup>+</sup> | 886.5598           | 5.85     |      |
| PS 46:10  | [M+H] <sup>+</sup> | 912.5755           | 5.95     |      |
| PS 46:9   | [M+H] <sup>+</sup> | 914.5911           | 6.36     |      |
| <b>SM</b> | SM 30:1            | [M+H] <sup>+</sup> | 647.5128 | 4.36 |

|  |         |                    |          |      |
|--|---------|--------------------|----------|------|
|  | SM 30:2 | [M+H] <sup>+</sup> | 645.4972 | 3.70 |
|  | SM 31:1 | [M+H] <sup>+</sup> | 661.5285 | 4.73 |
|  | SM 32:0 | [M+H] <sup>+</sup> | 677.5598 | 5.41 |
|  | SM 32:1 | [M+H] <sup>+</sup> | 675.5441 | 5.07 |
|  | SM 32:2 | [M+H] <sup>+</sup> | 673.5285 | 4.50 |
|  | SM 33:0 | [M+H] <sup>+</sup> | 691.5754 | 5.75 |
|  | SM 33:2 | [M+H] <sup>+</sup> | 687.5441 | 4.95 |
|  | SM 34:1 | [M+H] <sup>+</sup> | 703.5754 | 5.74 |
|  | SM 34:2 | [M+H] <sup>+</sup> | 701.5598 | 5.24 |
|  | SM 34:3 | [M+H] <sup>+</sup> | 699.5441 | 4.75 |
|  | SM 35:2 | [M+H] <sup>+</sup> | 715.5754 | 5.67 |
|  | SM 36:1 | [M+H] <sup>+</sup> | 731.6067 | 6.43 |
|  | SM 36:1 | [M+H] <sup>+</sup> | 731.6067 | 9.64 |
|  | SM 36:2 | [M+H] <sup>+</sup> | 729.5911 | 5.97 |
|  | SM 36:3 | [M+H] <sup>+</sup> | 727.5754 | 5.54 |
|  | SM 36:4 | [M+H] <sup>+</sup> | 725.5598 | 5.01 |
|  | SM 37:1 | [M+H] <sup>+</sup> | 745.6223 | 6.79 |
|  | SM 37:2 | [M+H] <sup>+</sup> | 743.6067 | 6.35 |
|  | SM 37:4 | [M+H] <sup>+</sup> | 739.5754 | 6.52 |
|  | SM 38:0 | [M+H] <sup>+</sup> | 761.6536 | 7.35 |
|  | SM 38:1 | [M+H] <sup>+</sup> | 759.6380 | 7.03 |
|  | SM 38:1 | [M+H] <sup>+</sup> | 759.6380 | 9.88 |
|  | SM 38:3 | [M+H] <sup>+</sup> | 755.6067 | 6.23 |
|  | SM 38:4 | [M+H] <sup>+</sup> | 753.5911 | 5.63 |
|  | SM 39:1 | [M+H] <sup>+</sup> | 773.6536 | 7.36 |
|  | SM 40:1 | [M+H] <sup>+</sup> | 787.6693 | 7.61 |
|  | SM 40:2 | [M+H] <sup>+</sup> | 785.6536 | 7.15 |
|  | SM 40:3 | [M+H] <sup>+</sup> | 783.6380 | 6.72 |
|  | SM 40:4 | [M+H] <sup>+</sup> | 781.6223 | 6.32 |
|  | SM 40:8 | [M+H] <sup>+</sup> | 773.5598 | 7.16 |
|  | SM 41:1 | [M+H] <sup>+</sup> | 801.6849 | 7.87 |
|  | SM 42:1 | [M+H] <sup>+</sup> | 815.7006 | 8.13 |
|  | SM 42:2 | [M+H] <sup>+</sup> | 813.6849 | 7.65 |
|  | SM 42:3 | [M+H] <sup>+</sup> | 811.6693 | 7.27 |
|  | SM 42:4 | [M+H] <sup>+</sup> | 809.6536 | 6.89 |
|  | SM 42:5 | [M+H] <sup>+</sup> | 807.6380 | 6.54 |
|  | SM 42:6 | [M+H] <sup>+</sup> | 805.6223 | 6.06 |
|  | SM 42:7 | [M+H] <sup>+</sup> | 803.6067 | 7.47 |
|  | SM 43:1 | [M+H] <sup>+</sup> | 829.7162 | 8.35 |
|  | SM 43:2 | [M+H] <sup>+</sup> | 827.7006 | 7.90 |
|  | SM 43:3 | [M+H] <sup>+</sup> | 825.6849 | 7.45 |
|  | SM 43:6 | [M+H] <sup>+</sup> | 819.6380 | 7.72 |
|  | SM 44:1 | [M+H] <sup>+</sup> | 843.7319 | 8.60 |

|            |                                   |                                   |          |       |
|------------|-----------------------------------|-----------------------------------|----------|-------|
|            | SM 44:2                           | [M+H] <sup>+</sup>                | 841.7162 | 8.17  |
|            | SM 44:3                           | [M+H] <sup>+</sup>                | 839.7006 | 7.80  |
|            | SM 44:4                           | [M+H] <sup>+</sup>                | 837.6849 | 7.40  |
|            | SM 44:5                           | [M+H] <sup>+</sup>                | 835.6693 | 7.03  |
| <b>TAG</b> | TAG 36:0                          | [M+NH <sub>4</sub> ] <sup>+</sup> | 656.5829 | 8.68  |
|            | TAG 38:0                          | [M+NH <sub>4</sub> ] <sup>+</sup> | 684.6142 | 9.12  |
|            | TAG 40:0                          | [M+NH <sub>4</sub> ] <sup>+</sup> | 712.6455 | 9.49  |
|            | TAG 40:1                          | [M+NH <sub>4</sub> ] <sup>+</sup> | 710.6299 | 9.16  |
|            | TAG 41:0                          | [M+NH <sub>4</sub> ] <sup>+</sup> | 726.6612 | 9.62  |
|            | TAG 42:0                          | [M+NH <sub>4</sub> ] <sup>+</sup> | 740.6768 | 9.80  |
|            | TAG 42:1                          | [M+NH <sub>4</sub> ] <sup>+</sup> | 738.6612 | 9.51  |
|            | TAG 42:2                          | [M+NH <sub>4</sub> ] <sup>+</sup> | 736.6455 | 9.23  |
|            | TAG 42:3                          | [M+NH <sub>4</sub> ] <sup>+</sup> | 734.6299 | 8.97  |
|            | TAG 43:0                          | [M+NH <sub>4</sub> ] <sup>+</sup> | 754.6925 | 9.89  |
|            | TAG 44:0                          | [M+NH <sub>4</sub> ] <sup>+</sup> | 768.7081 | 10.07 |
|            | TAG 44:1                          | [M+NH <sub>4</sub> ] <sup>+</sup> | 766.6925 | 9.83  |
|            | TAG 44:2                          | [M+NH <sub>4</sub> ] <sup>+</sup> | 764.6768 | 9.60  |
|            | TAG 45:0                          | [M+NH <sub>4</sub> ] <sup>+</sup> | 782.7238 | 10.18 |
|            | TAG 45:1                          | [M+NH <sub>4</sub> ] <sup>+</sup> | 780.7081 | 9.96  |
|            | TAG 45:2                          | [M+NH <sub>4</sub> ] <sup>+</sup> | 778.6925 | 9.74  |
|            | TAG 46:0                          | [M+NH <sub>4</sub> ] <sup>+</sup> | 796.7394 | 10.33 |
|            | TAG 46:1                          | [M+NH <sub>4</sub> ] <sup>+</sup> | 794.7238 | 10.10 |
|            | TAG 46:2                          | [M+NH <sub>4</sub> ] <sup>+</sup> | 792.7081 | 9.88  |
|            | TAG 46:3                          | [M+NH <sub>4</sub> ] <sup>+</sup> | 790.6925 | 9.61  |
|            | TAG 47:0                          | [M+NH <sub>4</sub> ] <sup>+</sup> | 810.7551 | 10.43 |
|            | TAG 47:1                          | [M+NH <sub>4</sub> ] <sup>+</sup> | 808.7394 | 10.23 |
|            | TAG 47:2                          | [M+NH <sub>4</sub> ] <sup>+</sup> | 806.7238 | 10.04 |
|            | TAG 47:3                          | [M+NH <sub>4</sub> ] <sup>+</sup> | 804.7081 | 9.83  |
|            | TAG 48:0                          | [M+NH <sub>4</sub> ] <sup>+</sup> | 824.7707 | 10.58 |
|            | TAG 48:1                          | [M+NH <sub>4</sub> ] <sup>+</sup> | 822.7551 | 10.35 |
|            | TAG 48:2                          | [M+NH <sub>4</sub> ] <sup>+</sup> | 820.7394 | 10.15 |
|            | TAG 48:3                          | [M+NH <sub>4</sub> ] <sup>+</sup> | 818.7238 | 9.96  |
|            | TAG 48:4                          | [M+NH <sub>4</sub> ] <sup>+</sup> | 816.7081 | 9.69  |
|            | TAG 48:5                          | [M+NH <sub>4</sub> ] <sup>+</sup> | 814.6925 | 9.50  |
|            | TAG 49:0                          | [M+NH <sub>4</sub> ] <sup>+</sup> | 838.7864 | 10.68 |
|            | TAG 49:1                          | [M+NH <sub>4</sub> ] <sup>+</sup> | 836.7707 | 10.45 |
|            | TAG 49:2                          | [M+NH <sub>4</sub> ] <sup>+</sup> | 834.7551 | 10.30 |
| TAG 49:3   | [M+NH <sub>4</sub> ] <sup>+</sup> | 832.7394                          | 10.07    |       |
| TAG 50:0   | [M+NH <sub>4</sub> ] <sup>+</sup> | 852.8020                          | 10.86    |       |
| TAG 50:1   | [M+Na] <sup>+</sup>               | 855.7418                          | 9.25     |       |
| TAG 50:1   | [M+NH <sub>4</sub> ] <sup>+</sup> | 850.7864                          | 10.59    |       |
| TAG 50:2   | [M+NH <sub>4</sub> ] <sup>+</sup> | 848.7707                          | 10.37    |       |
| TAG 50:3   | [M+NH <sub>4</sub> ] <sup>+</sup> | 846.7551                          | 10.19    |       |



|          |                      |          |       |
|----------|----------------------|----------|-------|
| TAG 50:4 | [M+NH4] <sup>+</sup> | 844.7394 | 9.99  |
| TAG 50:5 | [M+NH4] <sup>+</sup> | 842.7238 | 9.78  |
| TAG 50:6 | [M+NH4] <sup>+</sup> | 840.7081 | 9.58  |
| TAG 51:0 | [M+NH4] <sup>+</sup> | 866.8177 | 10.92 |
| TAG 51:1 | [M+NH4] <sup>+</sup> | 864.8020 | 10.71 |
| TAG 51:2 | [M+NH4] <sup>+</sup> | 862.7864 | 10.52 |
| TAG 51:3 | [M+NH4] <sup>+</sup> | 860.7707 | 10.33 |
| TAG 51:4 | [M+NH4] <sup>+</sup> | 858.7551 | 10.14 |
| TAG 51:5 | [M+NH4] <sup>+</sup> | 856.7394 | 9.91  |
| TAG 52:0 | [M+Na] <sup>+</sup>  | 885.7887 | 11.02 |
| TAG 52:0 | [M+NH4] <sup>+</sup> | 880.8333 | 11.02 |
| TAG 52:1 | [M+Na] <sup>+</sup>  | 883.7731 | 10.49 |
| TAG 52:1 | [M+NH4] <sup>+</sup> | 878.8177 | 10.87 |
| TAG 52:2 | [M+NH4] <sup>+</sup> | 876.8020 | 10.62 |
| TAG 52:3 | [M+Na] <sup>+</sup>  | 879.7418 | 10.40 |
| TAG 52:3 | [M+NH4] <sup>+</sup> | 874.7864 | 10.42 |
| TAG 52:4 | [M+NH4] <sup>+</sup> | 872.7707 | 10.27 |
| TAG 52:5 | [M+Na] <sup>+</sup>  | 875.7105 | 10.05 |
| TAG 52:5 | [M+NH4] <sup>+</sup> | 870.7551 | 10.08 |
| TAG 52:6 | [M+NH4] <sup>+</sup> | 868.7394 | 9.90  |
| TAG 53:0 | [M+NH4] <sup>+</sup> | 894.8490 | 11.18 |
| TAG 53:1 | [M+NH4] <sup>+</sup> | 892.8333 | 10.96 |
| TAG 53:2 | [M+NH4] <sup>+</sup> | 890.8177 | 10.75 |
| TAG 53:3 | [M+NH4] <sup>+</sup> | 888.8020 | 10.56 |
| TAG 53:4 | [M+NH4] <sup>+</sup> | 886.7864 | 10.38 |
| TAG 53:5 | [M+NH4] <sup>+</sup> | 884.7707 | 10.18 |
| TAG 54:0 | [M+NH4] <sup>+</sup> | 908.8646 | 11.30 |
| TAG 54:0 | [M+NH4] <sup>+</sup> | 908.8646 | 12.28 |
| TAG 54:1 | [M+NH4] <sup>+</sup> | 906.8490 | 11.11 |
| TAG 54:2 | [M+NH4] <sup>+</sup> | 904.8333 | 10.88 |
| TAG 54:3 | [M+NH4] <sup>+</sup> | 902.8177 | 10.68 |
| TAG 54:4 | [M+NH4] <sup>+</sup> | 900.8020 | 10.53 |
| TAG 54:5 | [M+NH4] <sup>+</sup> | 898.7864 | 10.37 |
| TAG 54:6 | [M+NH4] <sup>+</sup> | 896.7707 | 10.17 |
| TAG 54:7 | [M+NH4] <sup>+</sup> | 894.7551 | 10.07 |
| TAG 54:8 | [M+NH4] <sup>+</sup> | 892.7394 | 9.70  |
| TAG 54:9 | [M+NH4] <sup>+</sup> | 890.7238 | 9.73  |
| TAG 56:0 | [M+NH4] <sup>+</sup> | 936.8959 | 11.52 |
| TAG 56:1 | [M+NH4] <sup>+</sup> | 934.8803 | 11.27 |
| TAG 56:2 | [M+NH4] <sup>+</sup> | 932.8646 | 11.08 |
| TAG 56:3 | [M+NH4] <sup>+</sup> | 930.8490 | 10.90 |
| TAG 56:4 | [M+NH4] <sup>+</sup> | 928.8333 | 10.74 |
| TAG 56:5 | [M+NH4] <sup>+</sup> | 926.8177 | 10.62 |

|  |           |                      |           |       |
|--|-----------|----------------------|-----------|-------|
|  | TAG 56:6  | [M+NH4] <sup>+</sup> | 924.8020  | 10.41 |
|  | TAG 56:7  | [M+NH4] <sup>+</sup> | 922.7864  | 10.26 |
|  | TAG 56:8  | [M+NH4] <sup>+</sup> | 920.7707  | 10.09 |
|  | TAG 58:0  | [M+NH4] <sup>+</sup> | 964.9272  | 11.81 |
|  | TAG 58:1  | [M+NH4] <sup>+</sup> | 962.9116  | 11.58 |
|  | TAG 58:10 | [M+NH4] <sup>+</sup> | 944.7707  | 10.04 |
|  | TAG 58:3  | [M+NH4] <sup>+</sup> | 958.8803  | 11.14 |
|  | TAG 58:4  | [M+NH4] <sup>+</sup> | 956.8646  | 11.06 |
|  | TAG 58:5  | [M+NH4] <sup>+</sup> | 954.8490  | 10.81 |
|  | TAG 58:6  | [M+NH4] <sup>+</sup> | 952.8333  | 10.74 |
|  | TAG 58:8  | [M+NH4] <sup>+</sup> | 948.8020  | 10.36 |
|  | TAG 58:9  | [M+NH4] <sup>+</sup> | 946.7864  | 10.16 |
|  | TAG 60:10 | [M+NH4] <sup>+</sup> | 972.8020  | 10.30 |
|  | TAG 60:11 | [M+NH4] <sup>+</sup> | 970.7864  | 10.11 |
|  | TAG 60:12 | [M+NH4] <sup>+</sup> | 968.7707  | 9.96  |
|  | TAG 60:7  | [M+NH4] <sup>+</sup> | 978.8490  | 10.83 |
|  | TAG 60:9  | [M+NH4] <sup>+</sup> | 974.8177  | 10.41 |
|  | TAG 62:1  | [M+NH4] <sup>+</sup> | 1018.9740 | 12.17 |
|  | TAG 62:12 | [M+NH4] <sup>+</sup> | 996.8020  | 10.31 |
|  | TAG 62:13 | [M+NH4] <sup>+</sup> | 994.7864  | 9.99  |
|  | TAG 62:14 | [M+NH4] <sup>+</sup> | 992.7707  | 9.88  |
|  | TAG 64:15 | [M+NH4] <sup>+</sup> | 1018.7860 | 9.93  |
|  | TAG 64:16 | [M+NH4] <sup>+</sup> | 1016.7710 | 9.81  |

| <b>Lipids in Negative Mode (n=487)</b> |                      |                        |            |               |
|----------------------------------------|----------------------|------------------------|------------|---------------|
| <b>Class</b>                           | <b>Compound name</b> | <b>Type of adducts</b> | <b>m/z</b> | <b>RT/min</b> |
| <b>FFA</b>                             | FFA(16:0)            | [M-H] <sup>-</sup>     | 255.2329   | 2.30          |
|                                        | FFA(18:0)            | [M-H] <sup>-</sup>     | 283.2642   | 3.27          |
|                                        | FFA(18:1)            | [M-H] <sup>-</sup>     | 281.2486   | 2.50          |
|                                        | FFA(18:2)            | [M-H] <sup>-</sup>     | 279.2329   | 1.92          |
|                                        | FFA(20:0)            | [M-H] <sup>-</sup>     | 311.2955   | 4.30          |
|                                        | FFA(20:1)            | [M-H] <sup>-</sup>     | 309.2799   | 3.45          |
|                                        | FFA(20:2)            | [M-H] <sup>-</sup>     | 307.2642   | 2.82          |
|                                        | FFA(20:4)            | [M-H] <sup>-</sup>     | 303.2329   | 1.85          |
|                                        | FFA(22:0)            | [M-H] <sup>-</sup>     | 339.3268   | 5.29          |
|                                        | FFA(22:1)            | [M-H] <sup>-</sup>     | 337.3112   | 4.43          |
|                                        | FFA(22:2)            | [M-H] <sup>-</sup>     | 335.2955   | 3.76          |
|                                        | FFA(22:3)            | [M-H] <sup>-</sup>     | 333.2799   | 3.18          |
|                                        | FFA(24:0)            | [M-H] <sup>-</sup>     | 367.3581   | 6.21          |
|                                        | FFA(24:1)            | [M-H] <sup>-</sup>     | 365.3425   | 5.36          |
|                                        | FFA(24:2)            | [M-H] <sup>-</sup>     | 363.3268   | 4.70          |
|                                        | FFA(24:3)            | [M-H] <sup>-</sup>     | 361.3112   | 4.07          |
| <b>Cer[AS]</b>                         | Cer[AS] 35:1         | [M+Hac-H] <sup>-</sup> | 626.5360   | 6.55          |

|                  |                |            |          |       |
|------------------|----------------|------------|----------|-------|
|                  | Cer[AS] 36:1   | [M+Hac-H]- | 640.5516 | 7.22  |
|                  | Cer[AS] 37:1   | [M+Hac-H]- | 654.5673 | 7.41  |
|                  | Cer[AS] 38:2   | [M+Hac-H]- | 666.5673 | 7.59  |
|                  | Cer[AS] 39:2   | [M+Hac-H]- | 680.5829 | 7.60  |
| <b>Cer[EODS]</b> | Cer[EODS] 56:0 | [M-H]-     | 876.8384 | 8.33  |
|                  | Cer[EODS] 58:0 | [M-H]-     | 904.8697 | 8.81  |
|                  | Cer[EODS] 58:1 | [M+Hac-H]- | 962.8752 | 10.58 |
|                  | Cer[EODS] 60:0 | [M-H]-     | 932.9010 | 8.94  |
|                  | Cer[EODS] 60:1 | [M-H]-     | 930.8854 | 8.50  |
| <b>Cer[EOS]</b>  | Cer[EOS] 60:1  | [M-H]-     | 930.8854 | 8.51  |
| <b>Cer[NDS]</b>  | Cer[NDS] 34:0  | [M+Hac-H]- | 598.5411 | 7.03  |
|                  | Cer[NDS] 34:0  | [M-H]-     | 538.5199 | 7.07  |
|                  | Cer[NDS] 36:0  | [M+Hac-H]- | 626.5724 | 7.63  |
|                  | Cer[NDS] 36:0  | [M-H]-     | 566.5512 | 7.63  |
|                  | Cer[NDS] 38:0  | [M+Hac-H]- | 654.6037 | 8.12  |
|                  | Cer[NDS] 38:0  | [M-H]-     | 594.5825 | 8.14  |
|                  | Cer[NDS] 40:0  | [M+Hac-H]- | 682.6350 | 8.60  |
|                  | Cer[NDS] 40:0  | [M-H]-     | 622.6138 | 8.64  |
|                  | Cer[NDS] 42:0  | [M-H]-     | 650.6451 | 9.10  |
|                  | Cer[NDS] 42:1  | [M-H]-     | 648.6295 | 8.65  |
| <b>Cer[NP]</b>   | Cer[NP] 35:0   | [M+Hac-H]- | 628.5516 | 7.05  |
|                  | Cer[NP] 35:1   | [M+Hac-H]- | 626.5360 | 6.58  |
|                  | Cer[NP] 36:0   | [M+Hac-H]- | 642.5673 | 7.17  |
|                  | Cer[NP] 38:0   | [M+Hac-H]- | 670.5986 | 7.73  |
|                  | Cer[NP] 40:0   | [M+Hac-H]- | 698.6299 | 8.22  |
|                  | Cer[NP] 42:0   | [M+Hac-H]- | 726.6612 | 8.68  |
|                  | Cer[NP] 42:1   | [M+Hac-H]- | 724.6455 | 8.25  |
|                  | Cer[NP] 42:2   | [M+Hac-H]- | 722.6299 | 7.88  |
| <b>Cer[NS]</b>   | Cer[NS] 30:1   | [M-H]-     | 480.4417 | 5.50  |
|                  | Cer[NS] 31:1   | [M+Hac-H]- | 554.4784 | 5.85  |
|                  | Cer[NS] 32:1   | [M+Hac-H]- | 568.4941 | 6.21  |
|                  | Cer[NS] 32:1   | [M-H]-     | 508.4730 | 6.22  |
|                  | Cer[NS] 32:2   | [M+Hac-H]- | 566.4784 | 5.66  |
|                  | Cer[NS] 33:1   | [M+Hac-H]- | 582.5098 | 6.54  |
|                  | Cer[NS] 33:1   | [M-H]-     | 522.4886 | 6.55  |
|                  | Cer[NS] 34:1   | [M+Hac-H]- | 596.5254 | 6.81  |
|                  | Cer[NS] 34:1   | [M-H]-     | 536.5043 | 6.85  |
|                  | Cer[NS] 34:2   | [M+Hac-H]- | 594.5098 | 6.33  |
|                  | Cer[NS] 34:2   | [M-H]-     | 534.4886 | 6.35  |
|                  | Cer[NS] 35:2   | [M+Hac-H]- | 608.5254 | 6.71  |
|                  | Cer[NS] 36:1   | [M+Hac-H]- | 624.5567 | 7.40  |
|                  | Cer[NS] 36:1   | [M-H]-     | 564.5356 | 7.42  |
|                  | Cer[NS] 36:2   | [M+Hac-H]- | 622.5411 | 6.98  |

|              |              |            |          |      |
|--------------|--------------|------------|----------|------|
|              | Cer[NS] 36:2 | [M+Hac-H]- | 622.5411 | 7.46 |
|              | Cer[NS] 36:2 | [M-H]-     | 562.5199 | 7.01 |
|              | Cer[NS] 37:1 | [M+Hac-H]- | 638.5724 | 7.70 |
|              | Cer[NS] 37:1 | [M-H]-     | 578.5512 | 7.74 |
|              | Cer[NS] 37:2 | [M+Hac-H]- | 636.5567 | 7.32 |
|              | Cer[NS] 38:1 | [M+Hac-H]- | 652.5880 | 7.96 |
|              | Cer[NS] 38:1 | [M-H]-     | 592.5669 | 7.97 |
|              | Cer[NS] 38:2 | [M+Hac-H]- | 650.5724 | 7.59 |
|              | Cer[NS] 38:2 | [M-H]-     | 590.5512 | 7.58 |
|              | Cer[NS] 38:3 | [M+Hac-H]- | 648.5567 | 7.04 |
|              | Cer[NS] 39:1 | [M+Hac-H]- | 666.6037 | 8.25 |
|              | Cer[NS] 39:1 | [M-H]-     | 606.5825 | 8.26 |
|              | Cer[NS] 39:2 | [M+Hac-H]- | 664.5880 | 7.88 |
|              | Cer[NS] 40:1 | [M+Hac-H]- | 680.6193 | 8.45 |
|              | Cer[NS] 40:1 | [M-H]-     | 620.5982 | 8.45 |
|              | Cer[NS] 40:2 | [M+Hac-H]- | 678.6037 | 8.10 |
|              | Cer[NS] 40:2 | [M-H]-     | 618.5825 | 8.11 |
|              | Cer[NS] 40:3 | [M-H]-     | 616.5669 | 7.62 |
|              | Cer[NS] 41:1 | [M+Hac-H]- | 694.6350 | 8.68 |
|              | Cer[NS] 41:1 | [M-H]-     | 634.6138 | 8.73 |
|              | Cer[NS] 41:2 | [M+Hac-H]- | 692.6193 | 8.24 |
|              | Cer[NS] 41:2 | [M-H]-     | 632.5982 | 8.28 |
|              | Cer[NS] 42:1 | [M+Hac-H]- | 708.6506 | 8.88 |
|              | Cer[NS] 42:1 | [M-H]-     | 648.6295 | 8.90 |
|              | Cer[NS] 42:2 | [M+Hac-H]- | 706.6350 | 8.49 |
|              | Cer[NS] 42:2 | [M-H]-     | 646.6138 | 8.48 |
|              | Cer[NS] 42:3 | [M+Hac-H]- | 704.6193 | 8.11 |
|              | Cer[NS] 42:3 | [M-H]-     | 644.5982 | 8.13 |
|              | Cer[NS] 43:1 | [M+Hac-H]- | 722.6663 | 9.03 |
|              | Cer[NS] 43:1 | [M-H]-     | 662.6451 | 9.06 |
| <b>FAHFA</b> | FAHFA 30:2   | [M-H]-     | 477.3949 | 1.51 |
|              | FAHFA 31:0   | [M-H]-     | 495.4419 | 1.73 |
|              | FAHFA 32:1   | [M-H]-     | 507.4419 | 1.67 |
|              | FAHFA 33:0   | [M-H]-     | 523.4732 | 2.29 |
|              | FAHFA 34:0   | [M-H]-     | 537.4888 | 2.43 |
|              | FAHFA 34:2   | [M-H]-     | 533.4575 | 1.88 |
|              | FAHFA 34:2   | [M-H]-     | 533.4575 | 2.42 |
|              | FAHFA 34:3   | [M-H]-     | 531.4419 | 0.99 |
|              | FAHFA 34:4   | [M-H]-     | 529.4262 | 1.72 |
|              | FAHFA 34:5   | [M-H]-     | 527.4106 | 1.51 |
|              | FAHFA 35:0   | [M-H]-     | 551.5045 | 2.56 |
|              | FAHFA 35:2   | [M-H]-     | 547.4732 | 2.58 |
|              | FAHFA 36:0   | [M-H]-     | 565.5201 | 3.12 |

|                   |                 |            |          |       |
|-------------------|-----------------|------------|----------|-------|
|                   | FAHFA 36:0      | [M-H]-     | 565.5201 | 7.77  |
|                   | FAHFA 36:1      | [M-H]-     | 563.5045 | 2.54  |
|                   | FAHFA 36:2      | [M-H]-     | 561.4888 | 2.49  |
|                   | FAHFA 36:3      | [M-H]-     | 559.4732 | 1.48  |
|                   | FAHFA 36:3      | [M-H]-     | 559.4732 | 2.09  |
|                   | FAHFA 36:3      | [M-H]-     | 559.4732 | 2.49  |
|                   | FAHFA 36:4      | [M-H]-     | 557.4575 | 2.22  |
|                   | FAHFA 37:3      | [M-H]-     | 573.4888 | 1.78  |
|                   | FAHFA 37:3      | [M-H]-     | 573.4888 | 2.55  |
|                   | FAHFA 38:0      | [M-H]-     | 593.5514 | 3.43  |
|                   | FAHFA 38:2      | [M-H]-     | 589.5201 | 2.73  |
|                   | FAHFA 38:3      | [M-H]-     | 587.5045 | 10.50 |
|                   | FAHFA 38:3      | [M-H]-     | 587.5045 | 9.69  |
|                   | FAHFA 38:4      | [M-H]-     | 585.4888 | 2.50  |
|                   | FAHFA 38:5      | [M-H]-     | 583.4732 | 2.01  |
|                   | FAHFA 38:6      | [M-H]-     | 581.4575 | 1.89  |
|                   | FAHFA 40:3      | [M-H]-     | 615.5358 | 10.09 |
|                   | FAHFA 40:3      | [M-H]-     | 615.5358 | 10.78 |
|                   | FAHFA 40:4      | [M-H]-     | 613.5201 | 2.52  |
|                   | FAHFA 40:5      | [M-H]-     | 611.5045 | 1.97  |
|                   | FAHFA 40:6      | [M-H]-     | 609.4888 | 2.07  |
|                   | FAHFA 40:7      | [M-H]-     | 607.4732 | 1.88  |
|                   | FAHFA 40:8      | [M-H]-     | 605.4575 | 1.96  |
|                   | FAHFA 42:2      | [M-H]-     | 645.5827 | 4.28  |
|                   | FAHFA 42:3      | [M-H]-     | 643.5671 | 4.30  |
|                   | FAHFA 42:7      | [M-H]-     | 635.5045 | 1.86  |
|                   | FAHFA 42:8      | [M-H]-     | 633.4888 | 2.06  |
|                   | FAHFA 42:9      | [M-H]-     | 631.4732 | 1.82  |
|                   | FAHFA 44:11     | [M-H]-     | 655.4732 | 1.71  |
|                   | FAHFA 44:9      | [M-H]-     | 659.5045 | 1.76  |
| <b>GlcCer[NS]</b> | GlcCer[NS] 34:1 | [M+Hac-H]- | 758.5782 | 6.15  |
|                   | GlcCer[NS] 36:1 | [M+Hac-H]- | 786.6095 | 6.78  |
|                   | GlcCer[NS] 40:1 | [M+Hac-H]- | 842.6721 | 7.87  |
|                   | GlcCer[NS] 42:1 | [M+Hac-H]- | 870.7034 | 8.36  |
|                   | GlcCer[NS] 42:2 | [M+Hac-H]- | 868.6878 | 7.87  |
| <b>LPC</b>        | LPC 14:0        | [M+Hac-H]- | 526.3145 | 1.04  |
|                   | LPC 15:0        | [M+Hac-H]- | 540.3302 | 1.30  |
|                   | LPC 16:0        | [M+Hac-H]- | 554.3458 | 1.58  |
|                   | LPC 16:1        | [M+Hac-H]- | 552.3302 | 1.16  |
|                   | LPC 17:1        | [M+Hac-H]- | 566.3458 | 1.44  |
|                   | LPC 18:0        | [M+Hac-H]- | 582.3771 | 2.38  |
|                   | LPC 18:1        | [M+Hac-H]- | 580.3614 | 1.67  |
|                   | LPC 18:2        | [M+Hac-H]- | 578.3458 | 1.31  |

|            |          |            |          |      |
|------------|----------|------------|----------|------|
|            | LPC 18:3 | [M+Hac-H]- | 576.3302 | 1.05 |
|            | LPC 19:0 | [M+Hac-H]- | 596.3927 | 2.85 |
|            | LPC 20:0 | [M+Hac-H]- | 610.4084 | 3.32 |
|            | LPC 20:1 | [M+Hac-H]- | 608.3927 | 2.52 |
|            | LPC 20:2 | [M+Hac-H]- | 606.3771 | 1.96 |
|            | LPC 20:3 | [M+Hac-H]- | 604.3614 | 1.51 |
|            | LPC 20:4 | [M+Hac-H]- | 602.3458 | 1.27 |
|            | LPC 20:5 | [M+Hac-H]- | 600.3302 | 1.01 |
|            | LPC 22:4 | [M+Hac-H]- | 630.3771 | 1.72 |
|            | LPC 22:5 | [M+Hac-H]- | 628.3614 | 1.41 |
|            | LPC 22:6 | [M+Hac-H]- | 626.3458 | 1.19 |
|            | LPC 24:0 | [M+Hac-H]- | 666.4710 | 5.13 |
| <b>LPE</b> | LPE 16:0 | [M-H]-     | 452.2777 | 1.68 |
|            | LPE 18:0 | [M-H]-     | 480.3090 | 2.50 |
|            | LPE 18:1 | [M-H]-     | 478.2934 | 1.80 |
|            | LPE 18:2 | [M-H]-     | 476.2777 | 1.37 |
|            | LPE 20:1 | [M-H]-     | 506.3247 | 2.68 |
|            | LPE 20:3 | [M-H]-     | 502.2934 | 1.65 |
|            | LPE 20:4 | [M-H]-     | 500.2777 | 1.33 |
|            | LPE 20:5 | [M-H]-     | 498.2621 | 1.03 |
|            | LPE 22:4 | [M-H]-     | 528.3090 | 1.83 |
|            | LPE 22:5 | [M-H]-     | 526.2934 | 1.61 |
|            | LPE 22:6 | [M-H]-     | 524.2777 | 1.26 |
| <b>PA</b>  | PA 34:1  | [M-H]-     | 673.4808 | 6.64 |
|            | PA 34:2  | [M-H]-     | 671.4652 | 6.22 |
|            | PA 36:1  | [M-H]-     | 701.5121 | 6.41 |
|            | PA 38:3  | [M-H]-     | 725.5121 | 6.30 |
|            | PA 38:4  | [M-H]-     | 723.4965 | 6.06 |
|            | PA 38:4  | [M-H]-     | 723.4965 | 7.98 |
|            | PA 40:6  | [M-H]-     | 747.4965 | 8.05 |
| <b>PC</b>  | PC 28:0  | [M+Hac-H]- | 736.5129 | 5.20 |
|            | PC 29:0  | [M+Hac-H]- | 750.5285 | 5.56 |
|            | PC 30:0  | [M+Hac-H]- | 764.5442 | 5.87 |
|            | PC 30:1  | [M+Hac-H]- | 762.5285 | 5.41 |
|            | PC 30:2  | [M+Hac-H]- | 760.5129 | 5.05 |
|            | PC 30:3  | [M+Hac-H]- | 758.4972 | 4.66 |
|            | PC 31:0  | [M+Hac-H]- | 778.5598 | 6.23 |
|            | PC 32:0  | [M+Hac-H]- | 792.5755 | 6.50 |
|            | PC 32:1  | [M+Hac-H]- | 790.5598 | 6.01 |
|            | PC 32:2  | [M+Hac-H]- | 788.5442 | 5.58 |
|            | PC 32:3  | [M+Hac-H]- | 786.5285 | 5.41 |
|            | PC 32:4  | [M+Hac-H]- | 784.5129 | 4.94 |
|            | PC 33:0  | [M+Hac-H]- | 806.5911 | 6.81 |

|  |          |            |          |      |
|--|----------|------------|----------|------|
|  | PC 33:1  | [M+Hac-H]- | 804.5755 | 6.37 |
|  | PC 33:2  | [M+Hac-H]- | 802.5598 | 5.89 |
|  | PC 34:1  | [M+Hac-H]- | 818.5911 | 6.61 |
|  | PC 34:2  | [M+Hac-H]- | 816.5755 | 6.18 |
|  | PC 34:3  | [M+Hac-H]- | 814.5598 | 5.82 |
|  | PC 34:4  | [M+Hac-H]- | 812.5442 | 5.49 |
|  | PC 34:5  | [M+Hac-H]- | 810.5285 | 5.03 |
|  | PC 35:1  | [M+Hac-H]- | 832.6068 | 6.94 |
|  | PC 35:2  | [M+Hac-H]- | 830.5911 | 6.49 |
|  | PC 35:3  | [M+Hac-H]- | 828.5755 | 6.04 |
|  | PC 35:4  | [M+Hac-H]- | 826.5598 | 5.87 |
|  | PC 36:0  | [M+Hac-H]- | 848.6381 | 7.69 |
|  | PC 36:1  | [M+Hac-H]- | 846.6224 | 7.19 |
|  | PC 36:2  | [M+Hac-H]- | 844.6068 | 6.78 |
|  | PC 36:3  | [M+Hac-H]- | 842.5911 | 6.38 |
|  | PC 36:4  | [M+Hac-H]- | 840.5755 | 6.12 |
|  | PC 36:5  | [M+Hac-H]- | 838.5598 | 5.70 |
|  | PC 36:6  | [M+Hac-H]- | 836.5442 | 5.39 |
|  | PC 36:7  | [M+Hac-H]- | 834.5285 | 5.01 |
|  | PC 37:2  | [M+Hac-H]- | 858.6224 | 7.09 |
|  | PC 37:3  | [M+Hac-H]- | 856.6068 | 6.68 |
|  | PC 37:4  | [M+Hac-H]- | 854.5911 | 6.50 |
|  | PC 37:6  | [M+Hac-H]- | 850.5598 | 5.78 |
|  | PC 38:1  | [M+Hac-H]- | 874.6537 | 7.73 |
|  | PC 38:2  | [M+Hac-H]- | 872.6381 | 7.33 |
|  | PC 38:3  | [M+Hac-H]- | 870.6224 | 7.04 |
|  | PC 38:4  | [M+Hac-H]- | 868.6068 | 6.73 |
|  | PC 38:5  | [M+Hac-H]- | 866.5911 | 6.30 |
|  | PC 38:6  | [M+Hac-H]- | 864.5755 | 5.97 |
|  | PC 38:7  | [M+Hac-H]- | 862.5598 | 5.58 |
|  | PC 38:8  | [M+Hac-H]- | 860.5442 | 5.15 |
|  | PC 38:9  | [M+Hac-H]- | 858.5285 | 4.90 |
|  | PC 39:6  | [M+Hac-H]- | 878.5911 | 6.39 |
|  | PC 40:1  | [M+Hac-H]- | 902.6850 | 8.24 |
|  | PC 40:10 | [M+Hac-H]- | 884.5442 | 4.97 |
|  | PC 40:3  | [M+Hac-H]- | 898.6537 | 7.50 |
|  | PC 40:4  | [M+Hac-H]- | 896.6381 | 7.24 |
|  | PC 40:5  | [M+Hac-H]- | 894.6224 | 7.00 |
|  | PC 40:6  | [M+Hac-H]- | 892.6068 | 6.70 |
|  | PC 40:7  | [M+Hac-H]- | 890.5911 | 6.16 |
|  | PC 40:8  | [M+Hac-H]- | 888.5755 | 5.78 |
|  | PC 40:9  | [M+Hac-H]- | 886.5598 | 5.39 |
|  | PC 42:10 | [M+Hac-H]- | 912.5755 | 5.69 |

|           |          |            |          |      |
|-----------|----------|------------|----------|------|
|           | PC 42:11 | [M+Hac-H]- | 910.5598 | 5.27 |
|           | PC 42:4  | [M+Hac-H]- | 924.6694 | 7.71 |
|           | PC 42:6  | [M+Hac-H]- | 920.6381 | 7.34 |
|           | PC 42:7  | [M+Hac-H]- | 918.6224 | 6.80 |
|           | PC 42:8  | [M+Hac-H]- | 916.6068 | 6.36 |
|           | PC 42:9  | [M+Hac-H]- | 914.5911 | 5.99 |
|           | PC 44:10 | [M+Hac-H]- | 940.6068 | 6.18 |
|           | PC 44:11 | [M+Hac-H]- | 938.5911 | 5.90 |
|           | PC 44:12 | [M+Hac-H]- | 936.5755 | 5.57 |
|           | PC 44:4  | [M+Hac-H]- | 952.7007 | 8.05 |
|           | PC 44:6  | [M+Hac-H]- | 948.6694 | 7.83 |
|           | PC 44:9  | [M+Hac-H]- | 942.6224 | 6.51 |
|           | PC 48:10 | [M+Hac-H]- | 996.6694 | 7.17 |
| <b>PE</b> | PE 30:0  | [M-H]-     | 662.4761 | 5.21 |
|           | PE 30:0  | [M-H]-     | 662.4761 | 6.06 |
|           | PE 32:0  | [M-H]-     | 690.5074 | 5.89 |
|           | PE 32:0  | [M-H]-     | 690.5074 | 6.69 |
|           | PE 32:1  | [M-H]-     | 688.4917 | 6.17 |
|           | PE 32:2  | [M-H]-     | 686.4761 | 5.72 |
|           | PE 33:1  | [M-H]-     | 702.5074 | 6.53 |
|           | PE 33:2  | [M-H]-     | 700.4917 | 6.05 |
|           | PE 34:1  | [M-H]-     | 716.5230 | 6.81 |
|           | PE 34:2  | [M-H]-     | 714.5074 | 5.09 |
|           | PE 34:2  | [M-H]-     | 714.5074 | 6.37 |
|           | PE 34:3  | [M-H]-     | 712.4917 | 6.00 |
|           | PE 34:4  | [M-H]-     | 710.4761 | 5.71 |
|           | PE 35:1  | [M-H]-     | 730.5387 | 7.10 |
|           | PE 35:2  | [M-H]-     | 728.5230 | 6.66 |
|           | PE 35:3  | [M-H]-     | 726.5074 | 6.19 |
|           | PE 35:4  | [M-H]-     | 724.4917 | 6.07 |
|           | PE 36:0  | [M-H]-     | 746.5700 | 7.80 |
|           | PE 36:1  | [M-H]-     | 744.5543 | 7.38 |
|           | PE 36:2  | [M-H]-     | 742.5387 | 6.09 |
|           | PE 36:2  | [M-H]-     | 742.5387 | 6.94 |
|           | PE 36:3  | [M-H]-     | 740.5230 | 5.27 |
|           | PE 36:3  | [M-H]-     | 740.5230 | 6.54 |
|           | PE 36:4  | [M-H]-     | 738.5074 | 6.27 |
|           | PE 36:5  | [M-H]-     | 736.4917 | 5.89 |
|           | PE 36:6  | [M-H]-     | 734.4761 | 5.59 |
|           | PE 37:2  | [M-H]-     | 756.5543 | 7.24 |
|           | PE 37:4  | [M-H]-     | 752.5230 | 6.68 |
|           | PE 37:5  | [M-H]-     | 750.5074 | 6.18 |
|           | PE 38:1  | [M-H]-     | 772.5856 | 7.87 |



|           |          |        |          |      |
|-----------|----------|--------|----------|------|
|           | PE 38:2  | [M-H]- | 770.5700 | 7.46 |
|           | PE 38:3  | [M-H]- | 768.5543 | 7.21 |
|           | PE 38:4  | [M-H]- | 766.5387 | 6.87 |
|           | PE 38:5  | [M-H]- | 764.5230 | 6.51 |
|           | PE 38:6  | [M-H]- | 762.5074 | 6.17 |
|           | PE 38:7  | [M-H]- | 760.4917 | 5.75 |
|           | PE 39:4  | [M-H]- | 780.5543 | 7.08 |
|           | PE 40:1  | [M-H]- | 800.6169 | 8.42 |
|           | PE 40:10 | [M-H]- | 782.4761 | 5.15 |
|           | PE 40:2  | [M-H]- | 798.6013 | 7.93 |
|           | PE 40:3  | [M-H]- | 796.5856 | 7.65 |
|           | PE 40:4  | [M-H]- | 794.5700 | 7.38 |
|           | PE 40:5  | [M-H]- | 792.5543 | 7.20 |
|           | PE 40:6  | [M-H]- | 790.5387 | 6.88 |
|           | PE 40:6  | [M-H]- | 790.5387 | 8.69 |
|           | PE 40:7  | [M-H]- | 788.5230 | 6.36 |
|           | PE 40:8  | [M-H]- | 786.5074 | 5.89 |
|           | PE 40:9  | [M-H]- | 784.4917 | 5.58 |
|           | PE 42:1  | [M-H]- | 828.6482 | 8.84 |
|           | PE 42:10 | [M-H]- | 810.5074 | 5.81 |
|           | PE 42:11 | [M-H]- | 808.4917 | 5.43 |
|           | PE 42:2  | [M-H]- | 826.6326 | 8.41 |
|           | PE 42:4  | [M-H]- | 822.6013 | 8.05 |
|           | PE 42:6  | [M-H]- | 818.5700 | 7.45 |
|           | PE 42:7  | [M-H]- | 816.5543 | 6.95 |
|           | PE 42:9  | [M-H]- | 812.5230 | 6.12 |
|           | PE 44:10 | [M-H]- | 838.5387 | 6.33 |
|           | PE 44:12 | [M-H]- | 834.5074 | 5.72 |
|           | PE 44:2  | [M-H]- | 854.6639 | 8.83 |
|           | PE 44:4  | [M-H]- | 850.6326 | 8.50 |
|           | PE 44:9  | [M-H]- | 840.5543 | 6.70 |
|           | PE 46:10 | [M-H]- | 866.5700 | 6.84 |
| <b>PG</b> | PG 30:0  | [M-H]- | 693.4707 | 5.21 |
|           | PG 32:0  | [M-H]- | 721.5020 | 5.85 |
|           | PG 32:1  | [M-H]- | 719.4863 | 5.34 |
|           | PG 33:0  | [M-H]- | 735.5176 | 6.14 |
|           | PG 34:1  | [M-H]- | 747.5176 | 5.94 |
|           | PG 34:2  | [M-H]- | 745.5020 | 5.38 |
|           | PG 34:3  | [M-H]- | 743.4863 | 4.72 |
|           | PG 34:4  | [M-H]- | 741.4707 | 4.49 |
|           | PG 36:0  | [M-H]- | 777.5646 | 6.98 |
|           | PG 36:2  | [M-H]- | 773.5333 | 5.90 |
|           | PG 36:3  | [M-H]- | 771.5176 | 5.36 |

|            |          |            |          |      |
|------------|----------|------------|----------|------|
|            | PG 36:3  | [M-H]-     | 771.5176 | 5.75 |
|            | PG 36:4  | [M-H]-     | 769.5020 | 4.89 |
|            | PG 36:4  | [M-H]-     | 769.5020 | 5.54 |
|            | PG 36:5  | [M-H]-     | 767.4863 | 4.79 |
|            | PG 37:4  | [M-H]-     | 783.5176 | 5.82 |
|            | PG 38:2  | [M-H]-     | 801.5646 | 6.35 |
|            | PG 38:3  | [M-H]-     | 799.5489 | 5.92 |
|            | PG 38:3  | [M-H]-     | 799.5489 | 6.38 |
|            | PG 38:4  | [M-H]-     | 797.5333 | 5.59 |
|            | PG 38:4  | [M-H]-     | 797.5333 | 6.15 |
|            | PG 38:5  | [M-H]-     | 795.5176 | 5.19 |
|            | PG 38:5  | [M-H]-     | 795.5176 | 5.62 |
|            | PG 38:6  | [M-H]-     | 793.5020 | 4.85 |
|            | PG 38:6  | [M-H]-     | 793.5020 | 5.43 |
|            | PG 38:7  | [M-H]-     | 791.4863 | 4.54 |
|            | PG 40:4  | [M-H]-     | 825.5646 | 5.98 |
|            | PG 40:5  | [M-H]-     | 823.5489 | 5.76 |
|            | PG 40:6  | [M-H]-     | 821.5333 | 5.53 |
|            | PG 40:7  | [M-H]-     | 819.5176 | 5.15 |
|            | PG 40:8  | [M-H]-     | 817.5020 | 4.78 |
|            | PG 42:10 | [M-H]-     | 841.5020 | 4.75 |
|            | PG 42:6  | [M-H]-     | 849.5646 | 5.87 |
|            | PG 42:7  | [M-H]-     | 847.5489 | 5.66 |
|            | PG 42:8  | [M-H]-     | 845.5333 | 5.35 |
|            | PG 42:9  | [M-H]-     | 843.5176 | 4.99 |
|            | PG 44:10 | [M-H]-     | 869.5333 | 5.23 |
|            | PG 44:11 | [M-H]-     | 867.5176 | 4.99 |
|            | PG 44:12 | [M-H]-     | 865.5020 | 4.63 |
|            | PG 44:9  | [M-H]-     | 871.5489 | 5.52 |
| <b>PI</b>  | PI 34:1  | [M-H]-     | 835.5337 | 5.82 |
|            | PI 34:2  | [M-H]-     | 833.5180 | 5.35 |
|            | PI 36:1  | [M-H]-     | 863.5650 | 6.42 |
|            | PI 36:2  | [M-H]-     | 861.5493 | 5.98 |
|            | PI 36:3  | [M-H]-     | 859.5337 | 5.57 |
|            | PI 36:4  | [M-H]-     | 857.5180 | 5.31 |
|            | PI 38:3  | [M-H]-     | 887.5650 | 6.21 |
|            | PI 38:4  | [M-H]-     | 885.5493 | 5.94 |
|            | PI 38:5  | [M-H]-     | 883.5337 | 5.48 |
|            | PI 40:4  | [M-H]-     | 913.5806 | 6.40 |
|            | PI 40:5  | [M-H]-     | 911.5650 | 6.05 |
|            | PI 40:6  | [M-H]-     | 909.5493 | 5.91 |
| <b>pPC</b> | pPC 34:0 | [M+Hac-H]- | 804.6119 | 7.29 |
|            | pPC 34:1 | [M+Hac-H]- | 802.5962 | 6.98 |

|            |          |            |          |      |
|------------|----------|------------|----------|------|
|            | pPC 34:2 | [M+Hac-H]- | 800.5806 | 6.55 |
|            | pPC 36:1 | [M+Hac-H]- | 830.6275 | 7.38 |
|            | pPC 36:2 | [M+Hac-H]- | 828.6119 | 7.05 |
|            | pPC 36:4 | [M+Hac-H]- | 824.5806 | 6.52 |
|            | pPC 37:4 | [M+Hac-H]- | 838.5962 | 6.75 |
|            | pPC 38:4 | [M+Hac-H]- | 852.6119 | 6.82 |
|            | pPC 38:4 | [M+Hac-H]- | 852.6119 | 7.15 |
|            | pPC 38:6 | [M+Hac-H]- | 848.5806 | 6.37 |
|            | pPC 40:4 | [M+Hac-H]- | 880.6431 | 7.43 |
|            | pPC 40:6 | [M+Hac-H]- | 876.6119 | 6.58 |
|            | pPC 42:4 | [M+Hac-H]- | 908.6744 | 7.74 |
| <b>pPE</b> | pPE 32:0 | [M-H]-     | 674.5125 | 7.05 |
|            | pPE 32:1 | [M-H]-     | 672.4968 | 6.57 |
|            | pPE 32:2 | [M-H]-     | 670.4812 | 6.05 |
|            | pPE 33:1 | [M-H]-     | 686.5125 | 6.86 |
|            | pPE 34:0 | [M-H]-     | 702.5438 | 7.60 |
|            | pPE 34:1 | [M-H]-     | 700.5281 | 7.11 |
|            | pPE 34:2 | [M-H]-     | 698.5125 | 6.72 |
|            | pPE 34:3 | [M-H]-     | 696.4968 | 6.34 |
|            | pPE 34:4 | [M-H]-     | 694.4812 | 6.02 |
|            | pPE 35:0 | [M-H]-     | 716.5594 | 7.78 |
|            | pPE 35:1 | [M-H]-     | 714.5438 | 7.35 |
|            | pPE 35:2 | [M-H]-     | 712.5281 | 6.95 |
|            | pPE 35:4 | [M-H]-     | 708.4968 | 6.28 |
|            | pPE 36:0 | [M-H]-     | 730.5751 | 8.13 |
|            | pPE 36:1 | [M-H]-     | 728.5594 | 6.96 |
|            | pPE 36:1 | [M-H]-     | 728.5594 | 7.67 |
|            | pPE 36:2 | [M-H]-     | 726.5438 | 7.26 |
|            | pPE 36:3 | [M-H]-     | 724.5281 | 6.88 |
|            | pPE 36:4 | [M-H]-     | 722.5125 | 6.63 |
|            | pPE 36:5 | [M-H]-     | 720.4968 | 6.29 |
|            | pPE 36:6 | [M-H]-     | 718.4812 | 5.95 |
|            | pPE 37:1 | [M-H]-     | 742.5751 | 6.89 |
|            | pPE 37:1 | [M-H]-     | 742.5751 | 7.87 |
|            | pPE 37:2 | [M-H]-     | 740.5594 | 7.48 |
|            | pPE 37:3 | [M-H]-     | 738.5438 | 7.10 |
|            | pPE 37:4 | [M-H]-     | 736.5281 | 6.92 |
|            | pPE 37:5 | [M-H]-     | 734.5125 | 6.53 |
|            | pPE 37:6 | [M-H]-     | 732.4968 | 6.11 |
|            | pPE 38:1 | [M-H]-     | 756.5907 | 8.16 |
|            | pPE 38:2 | [M-H]-     | 754.5751 | 7.81 |
| pPE 38:3   | [M-H]-   | 752.5594   | 7.53     |      |
| pPE 38:4   | [M-H]-   | 750.5438   | 7.18     |      |

|           |          |        |          |      |
|-----------|----------|--------|----------|------|
|           | pPE 38:4 | [M-H]- | 750.5438 | 8.63 |
|           | pPE 38:5 | [M-H]- | 748.5281 | 6.65 |
|           | pPE 38:6 | [M-H]- | 746.5125 | 6.56 |
|           | pPE 39:3 | [M-H]- | 766.5751 | 6.69 |
|           | pPE 39:4 | [M-H]- | 764.5594 | 7.38 |
|           | pPE 39:6 | [M-H]- | 760.5281 | 6.83 |
|           | pPE 40:1 | [M-H]- | 784.6220 | 8.58 |
|           | pPE 40:2 | [M-H]- | 782.6064 | 8.24 |
|           | pPE 40:3 | [M-H]- | 780.5907 | 8.01 |
|           | pPE 40:4 | [M-H]- | 778.5751 | 7.66 |
|           | pPE 40:5 | [M-H]- | 776.5594 | 7.31 |
|           | pPE 40:6 | [M-H]- | 774.5438 | 6.98 |
|           | pPE 40:6 | [M-H]- | 774.5438 | 8.79 |
|           | pPE 41:4 | [M-H]- | 792.5907 | 7.89 |
|           | pPE 42:4 | [M-H]- | 806.6064 | 8.10 |
|           | pPE 42:5 | [M-H]- | 804.5907 | 7.82 |
|           | pPE 42:6 | [M-H]- | 802.5751 | 7.71 |
| <b>PS</b> | PS 34:1  | [M-H]- | 760.5129 | 5.96 |
|           | PS 34:2  | [M-H]- | 758.4972 | 5.44 |
|           | PS 36:1  | [M-H]- | 788.5442 | 6.52 |
|           | PS 36:2  | [M-H]- | 786.5285 | 6.02 |
|           | PS 36:3  | [M-H]- | 784.5129 | 5.83 |
|           | PS 36:4  | [M-H]- | 782.4972 | 5.43 |
|           | PS 38:1  | [M-H]- | 816.5755 | 7.16 |
|           | PS 38:2  | [M-H]- | 814.5598 | 6.55 |
|           | PS 38:3  | [M-H]- | 812.5442 | 6.30 |
|           | PS 38:4  | [M-H]- | 810.5285 | 6.02 |
|           | PS 38:5  | [M-H]- | 808.5129 | 5.55 |
|           | PS 38:6  | [M-H]- | 806.4972 | 5.31 |
|           | PS 40:1  | [M-H]- | 844.6068 | 7.64 |
|           | PS 40:2  | [M-H]- | 842.5911 | 7.10 |
|           | PS 40:4  | [M-H]- | 838.5598 | 6.52 |
|           | PS 40:5  | [M-H]- | 836.5442 | 6.31 |
|           | PS 40:6  | [M-H]- | 834.5285 | 5.97 |
|           | PS 40:7  | [M-H]- | 832.5129 | 5.47 |
|           | PS 40:8  | [M-H]- | 830.4972 | 4.97 |
|           | PS 42:1  | [M-H]- | 872.6381 | 8.11 |
|           | PS 42:10 | [M-H]- | 854.4972 | 4.91 |
|           | PS 42:6  | [M-H]- | 862.5598 | 6.59 |
|           | PS 42:7  | [M-H]- | 860.5442 | 6.05 |
|           | PS 42:8  | [M-H]- | 858.5285 | 5.68 |
|           | PS 42:9  | [M-H]- | 856.5129 | 5.20 |
|           | PS 44:10 | [M-H]- | 882.5285 | 5.35 |

|           |          |            |          |      |
|-----------|----------|------------|----------|------|
|           | PS 44:11 | [M-H]-     | 880.5129 | 5.00 |
|           | PS 44:12 | [M-H]-     | 878.4972 | 4.79 |
|           | PS 44:6  | [M-H]-     | 890.5911 | 7.15 |
|           | PS 44:7  | [M-H]-     | 888.5755 | 6.65 |
|           | PS 44:9  | [M-H]-     | 884.5442 | 5.85 |
|           | PS 46:10 | [M-H]-     | 910.5598 | 5.94 |
|           | PS 48:10 | [M-H]-     | 938.5911 | 6.48 |
| <b>SM</b> | SM 30:1  | [M+Hac-H]- | 705.5183 | 4.33 |
|           | SM 31:1  | [M+Hac-H]- | 719.5339 | 4.72 |
|           | SM 32:0  | [M+Hac-H]- | 735.5652 | 5.41 |
|           | SM 32:1  | [M+Hac-H]- | 733.5496 | 5.09 |
|           | SM 32:2  | [M+Hac-H]- | 731.5339 | 4.47 |
|           | SM 33:1  | [M+Hac-H]- | 747.5652 | 5.47 |
|           | SM 33:2  | [M+Hac-H]- | 745.5496 | 4.98 |
|           | SM 34:0  | [M+Hac-H]- | 763.5965 | 6.06 |
|           | SM 34:1  | [M+Hac-H]- | 761.5809 | 5.76 |
|           | SM 34:2  | [M+Hac-H]- | 759.5652 | 5.26 |
|           | SM 35:2  | [M+Hac-H]- | 773.5809 | 5.64 |
|           | SM 36:0  | [M+Hac-H]- | 791.6278 | 6.70 |
|           | SM 36:1  | [M+Hac-H]- | 789.6122 | 6.46 |
|           | SM 36:2  | [M+Hac-H]- | 787.5965 | 5.96 |
|           | SM 36:3  | [M+Hac-H]- | 785.5809 | 5.57 |
|           | SM 37:1  | [M+Hac-H]- | 803.6278 | 6.82 |
|           | SM 38:1  | [M+Hac-H]- | 817.6435 | 7.07 |
|           | SM 38:2  | [M+Hac-H]- | 815.6278 | 6.67 |
|           | SM 39:1  | [M+Hac-H]- | 831.6591 | 7.43 |
|           | SM 40:0  | [M+Hac-H]- | 847.6904 | 7.87 |
|           | SM 40:1  | [M+Hac-H]- | 845.6748 | 7.65 |
|           | SM 40:2  | [M+Hac-H]- | 843.6591 | 7.24 |
|           | SM 40:3  | [M+Hac-H]- | 841.6435 | 6.71 |
|           | SM 41:1  | [M+Hac-H]- | 859.6904 | 7.93 |
|           | SM 41:2  | [M+Hac-H]- | 857.6748 | 7.50 |
|           | SM 42:0  | [M+Hac-H]- | 875.7217 | 8.37 |
|           | SM 42:1  | [M+Hac-H]- | 873.7061 | 8.14 |
|           | SM 42:2  | [M+Hac-H]- | 871.6904 | 7.69 |
|           | SM 42:3  | [M+Hac-H]- | 869.6748 | 7.27 |
|           | SM 42:4  | [M+Hac-H]- | 867.6591 | 6.85 |
|           | SM 43:1  | [M+Hac-H]- | 887.7217 | 8.39 |
|           | SM 44:1  | [M+Hac-H]- | 901.7374 | 8.63 |
|           | SM 44:2  | [M+Hac-H]- | 899.7217 | 8.16 |

**Table S3:** Comparing z-score standardized mean values of lipid factors in study groups in central and peripheral retina

| Lipids    | Group       | Central Retina |       |                   | Peripheral Retina |       |                   |
|-----------|-------------|----------------|-------|-------------------|-------------------|-------|-------------------|
|           |             | Mean           | SE    | p value           | Mean              | SE    | p value           |
| AC (C≥14) | No DM       | 0.231          | 0.043 | <b>&lt;0.0001</b> | -0.138            | 0.053 | 0.4600            |
|           | DM, No DR   | 0.390          | 0.041 | <b>&lt;0.0001</b> | -0.164            | 0.066 | 0.8160            |
|           | DM, with DR | -0.123         | 0.059 | Ref               | -0.256            | 0.057 | Ref               |
| uFFA      | No DM       | 0.354          | 0.055 | <b>0.004</b>      | -0.064            | 0.058 | 0.571             |
|           | DM, No DR   | 0.088          | 0.056 | 0.9937            | -0.467            | 0.063 | <b>&lt;0.0001</b> |
|           | DM, with DR | 0.079          | 0.075 | Ref               | 0.024             | 0.081 | Ref               |
| FAHFA     | No DM       | 0.117          | 0.037 | <b>0.001</b>      | -0.028            | 0.039 | 0.650             |
|           | DM, No DR   | 0.168          | 0.039 | <b>&lt;0.0001</b> | -0.204            | 0.042 | <b>0.0003</b>     |
|           | DM, with DR | -0.068         | 0.038 | Ref               | 0.019             | 0.045 | Ref               |
| DAG       | No DM       | 0.160          | 0.032 | <b>&lt;0.0001</b> | 0.008             | 0.038 | 0.105             |
|           | DM, No DR   | 0.110          | 0.032 | <b>0.001</b>      | -0.096            | 0.036 | 0.991             |
|           | DM, with DR | -0.072         | 0.044 | Ref               | -0.102            | 0.047 | Ref               |
| TAG       | No DM       | 0.070          | 0.019 | <b>&lt;0.0001</b> | 0.170             | 0.022 | <b>&lt;0.0001</b> |
|           | DM, No DR   | 0.053          | 0.025 | <b>&lt;0.0001</b> | 0.004             | 0.025 | <b>0.007</b>      |
|           | DM, with DR | -0.183         | 0.031 | Ref               | -0.103            | 0.015 | Ref               |
| PC        | No DM       | 0.145          | 0.019 | <b>&lt;0.0001</b> | 0.051             | 0.019 | <b>&lt;0.0001</b> |
|           | DM, No DR   | 0.062          | 0.018 | <b>&lt;0.0001</b> | 0.005             | 0.019 | <b>&lt;0.0001</b> |
|           | DM, with DR | -0.115         | 0.030 | Ref               | -0.138            | 0.028 | Ref               |
| Cer[NS]   | No DM       | -0.143         | 0.041 | <b>&lt;0.0001</b> | -0.134            | 0.039 | <b>&lt;0.0001</b> |
|           | DM, No DR   | -0.055         | 0.043 | <b>0.003</b>      | -0.039            | 0.040 | <b>0.002</b>      |
|           | DM, with DR | 0.165          | 0.061 | Ref               | 0.193             | 0.066 | Ref               |
| ClucCer   | No DM       | 0.093          | 0.068 | 0.064             | 0.065             | 0.067 | 0.049             |
|           | DM, No DR   | 0.128          | 0.068 | 0.025             | 0.001             | 0.066 | 0.194             |
|           | DM, with DR | -0.125         | 0.080 | Ref               | -0.153            | 0.073 | Ref               |
| PG        | No DM       | 0.075          | 0.040 | <b>0.008</b>      | -0.039            | 0.036 | 0.698             |
|           | DM, No DR   | 0.036          | 0.035 | 0.052             | 0.008             | 0.037 | 0.997             |
|           | DM, with DR | -0.088         | 0.044 | Ref               | 0.005             | 0.041 | Ref               |
| CE        | No DM       | 0.057          | 0.076 | 0.0370            | 0.075             | 0.065 | 0.381             |
|           | DM, No DR   | 0.113          | 0.066 | <b>0.007</b>      | -0.014            | 0.080 | 0.930             |
|           | DM, with DR | -0.179         | 0.071 | Ref               | -0.045            | 0.064 | Ref               |
| pPC       | No DM       | 0.049          | 0.031 | 0.099             | 0.017             | 0.030 | 0.808             |
|           | DM, No DR   | 0.040          | 0.028 | 0.137             | -0.049            | 0.030 | 0.660             |
|           | DM, with DR | -0.045         | 0.042 | Ref               | -0.010            | 0.042 | Ref               |
| PI        | No DM       | 0.034          | 0.053 | 0.3180            | -0.059            | 0.050 | 0.4900            |
|           | DM, No DR   | -0.061         | 0.055 | 0.0360            | -0.109            | 0.058 | 0.2150            |
|           | DM, with DR | 0.152          | 0.079 | Ref               | 0.035             | 0.084 | Ref               |
| Cer[NDS]  | No DM       | -0.163         | 0.081 | 0.219             | 0.059             | 0.062 | 0.393             |
|           | DM, No DR   | -0.169         | 0.072 | 0.195             | 0.018             | 0.062 | 0.216             |
|           | DM, with DR | 0.050          | 0.129 | Ref               | 0.200             | 0.115 | Ref               |
| BMP       | No DM       | 0.079          | 0.057 | 0.886             | -0.070            | 0.052 | 0.027             |
|           | DM, No DR   | -0.056         | 0.051 | 0.298             | -0.131            | 0.065 | <b>0.002</b>      |
|           | DM, with DR | 0.048          | 0.056 | Ref               | 0.130             | 0.054 | Ref               |

|           |             |        |       |       |        |       |       |
|-----------|-------------|--------|-------|-------|--------|-------|-------|
| PE        | No DM       | -0.057 | 0.028 | 0.339 | 0.029  | 0.026 | 0.213 |
|           | DM, No DR   | -0.089 | 0.026 | 0.091 | 0.015  | 0.025 | 0.112 |
|           | DM, with DR | 0.002  | 0.042 | Ref   | 0.098  | 0.041 | Ref   |
| pPE       | No DM       | 0.120  | 0.036 | 0.784 | -0.093 | 0.031 | 0.861 |
|           | DM, No DR   | 0.109  | 0.035 | 0.652 | -0.168 | 0.035 | 0.578 |
|           | DM, with DR | 0.154  | 0.050 | Ref   | -0.119 | 0.051 | Ref   |
| PS        | No DM       | 0.002  | 0.031 | 0.680 | 0.012  | 0.028 | 0.262 |
|           | DM, No DR   | 0.017  | 0.028 | 0.870 | -0.007 | 0.028 | 0.451 |
|           | DM, with DR | 0.039  | 0.045 | Ref   | -0.063 | 0.050 | Ref   |
| SM        | No DM       | -0.043 | 0.035 | 0.279 | 0.022  | 0.031 | 0.838 |
|           | DM, No DR   | 0.007  | 0.033 | 0.878 | -0.013 | 0.034 | 0.974 |
|           | DM, with DR | 0.029  | 0.041 | Ref   | -0.003 | 0.042 | Ref   |
| Cer[AS]   | No DM       | 0.031  | 0.150 | 0.809 | -0.036 | 0.199 | 0.982 |
|           | DM, No DR   | 0.077  | 0.121 | 0.669 | 0.018  | 0.141 | 0.996 |
|           | DM, with DR | -0.091 | 0.193 | Ref   | 0.001  | 0.148 | Ref   |
| Cer[EDOS] | No DM       | -0.003 | 0.092 | 0.972 | -0.017 | 0.100 | 0.996 |
|           | DM, No DR   | -0.023 | 0.095 | 0.916 | 0.021  | 0.084 | 0.975 |
|           | DM, with DR | 0.026  | 0.110 | Ref   | -0.005 | 0.119 | Ref   |
| Cer[NP]   | No DM       | 0.062  | 0.084 | 0.891 | 0.023  | 0.081 | 0.844 |
|           | DM, No DR   | 0.016  | 0.085 | 0.999 | -0.066 | 0.096 | 0.978 |
|           | DM, with DR | 0.012  | 0.097 | Ref   | -0.043 | 0.104 | Ref   |
| LPC       | No DM       | -0.032 | 0.046 | 1.000 | 0.062  | 0.047 | 0.945 |
|           | DM, No DR   | -0.099 | 0.049 | 0.525 | 0.021  | 0.047 | 0.605 |
|           | DM, with DR | -0.032 | 0.054 | Ref   | 0.082  | 0.056 | Ref   |
| LPE       | No DM       | -0.027 | 0.059 | 0.980 | -0.031 | 0.063 | 0.782 |
|           | DM, No DR   | 0.016  | 0.058 | 0.937 | 0.023  | 0.057 | 0.999 |
|           | DM, with DR | -0.012 | 0.077 | Ref   | 0.028  | 0.086 | Ref   |
| PA        | No DM       | 0.030  | 0.082 | 0.999 | 0.012  | 0.080 | 0.662 |
|           | DM, No DR   | 0.001  | 0.091 | 0.974 | 0.023  | 0.087 | 0.596 |
|           | DM, with DR | 0.025  | 0.097 | Ref   | -0.089 | 0.109 | Ref   |

*CE, cholesterol Esters; BMP, bis(monoacylglycerol)phosphate; Cer[AS], ceramide class consisting of  $\alpha$ -hydroxy fatty acids and 4-sphingenines; Cer[EOS], omega-acylceramide; Cer[EODS], ceramide class consisting of ester-linked non-hydroxy fatty acids,  $\omega$ -hydroxy fatty acids and 4-sphingenines; Cer[NDS], non-hydroxy fatty acids and sphinganine; Cer[NDS], ceramide class consisting of non-hydroxy fatty acids and sphinganine; Cer[NP], ceramide class consisting of non-hydroxy fatty acids and 4-hydroxysphinganine; Cer[NS], non-hydroxy fatty acids and 4-sphinganine ceramide; DAG, diacylglycerol; GlcCer[NS], ceramide class consisting of non-hydroxy fatty acids and 4-sphingenines; FAHFA, Fatty Acid ester of Hydroxyl Fatty Acid; LPC, lysophosphatidylcholine; LPE, lysophosphatidylethanolamine; PC, phosphatidylcholine; pPC, plasmeyl-phosphatidylcholine; PE, phosphatidylethanolamine; pPE: plasmeyl-phosphatidylethanolamine; PS, phosphatidylserine; PA, phosphatidic acid; SM, sphingomyelin; TAG, triacylglycerol; AC, acylcarnitine; FFA, free Fatty Acid; PG, phosphatidylglycerol; PI, phosphatidylinositol*

**Fig S1:** Comparing standardized mean values of the study lipids by location of retina and study groups in the postmortem cohort. Values are means and 95% confidence intervals. The p value shows the significance of mean values by the main effect of location (comparing central versus peripheral retina).

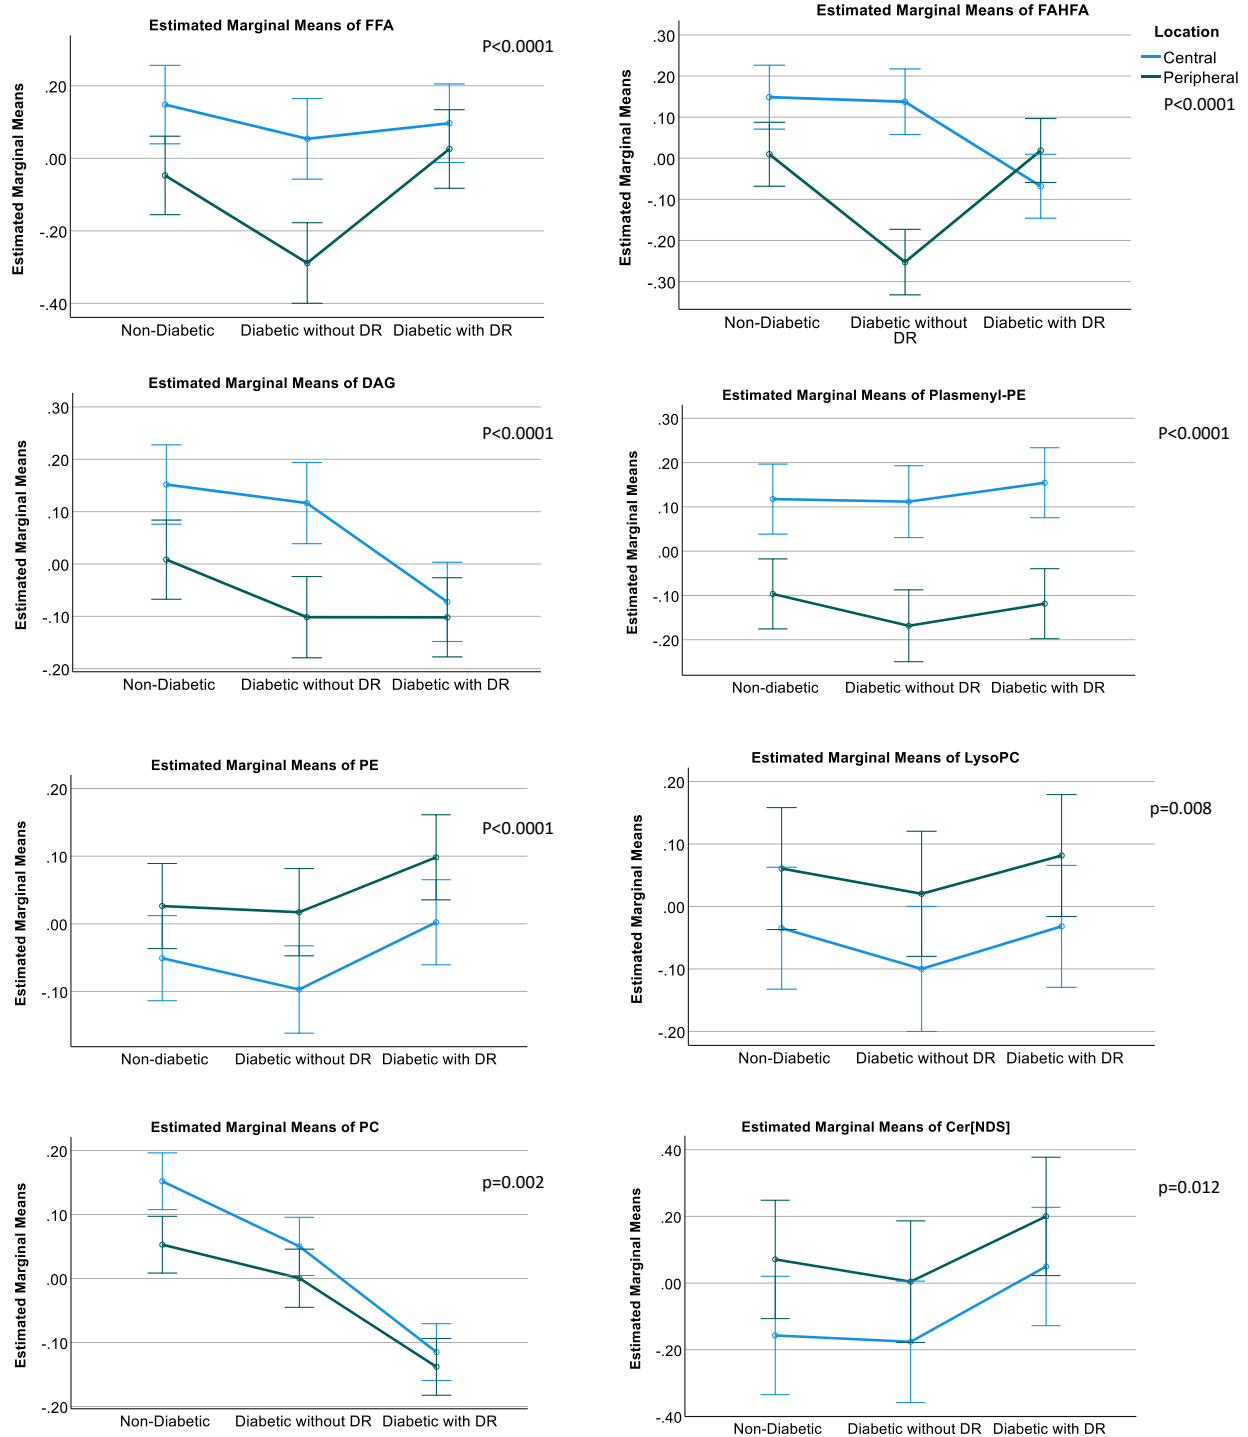



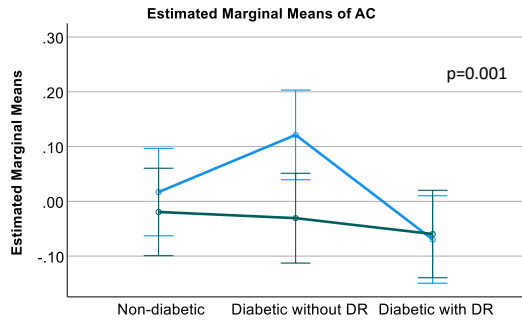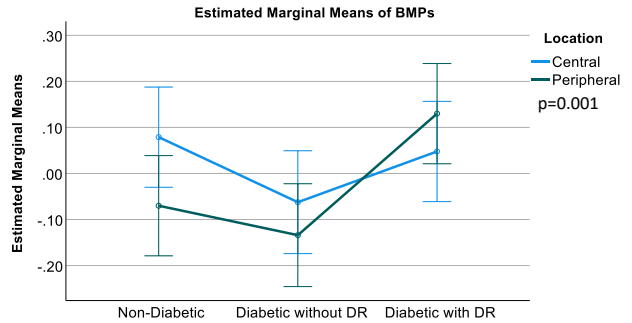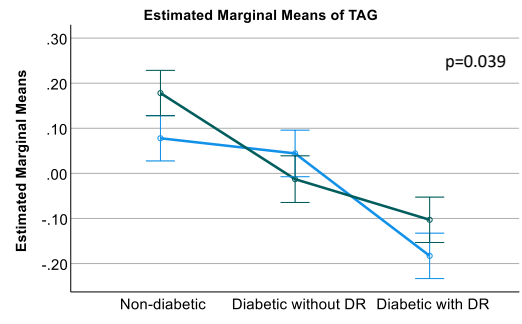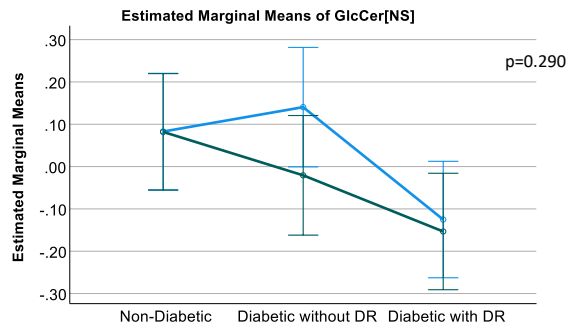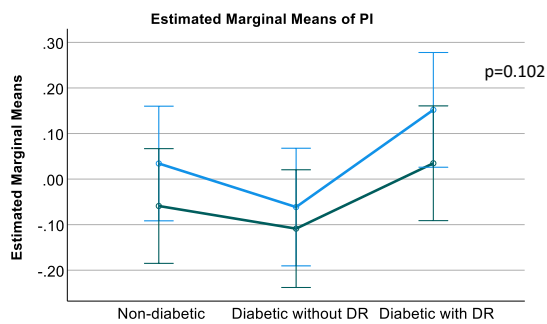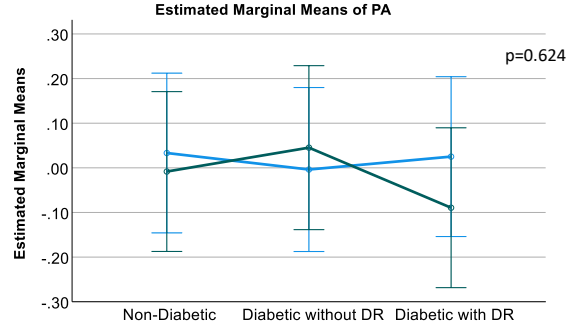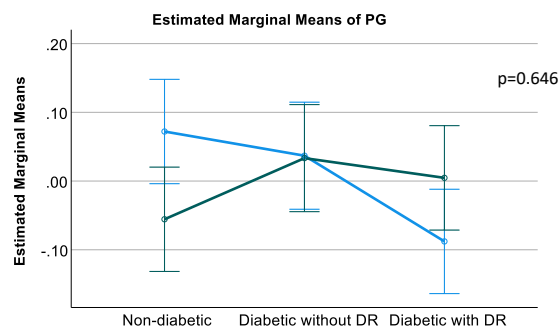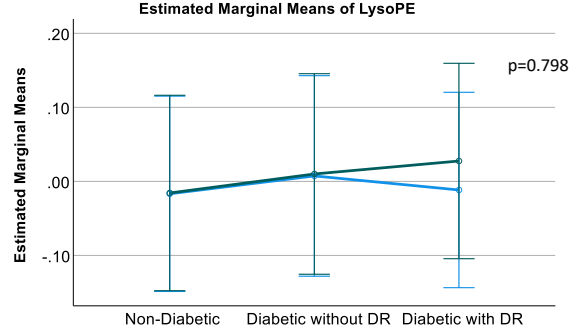

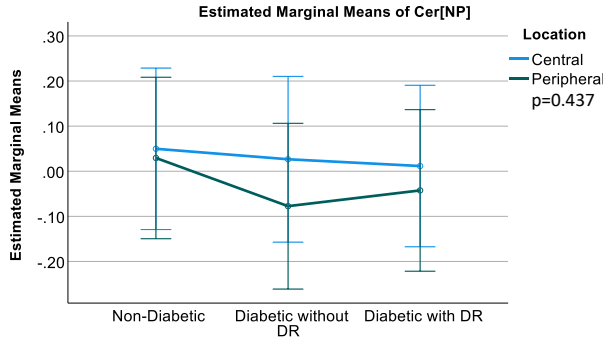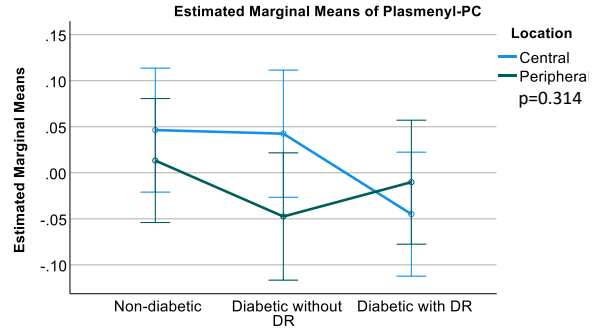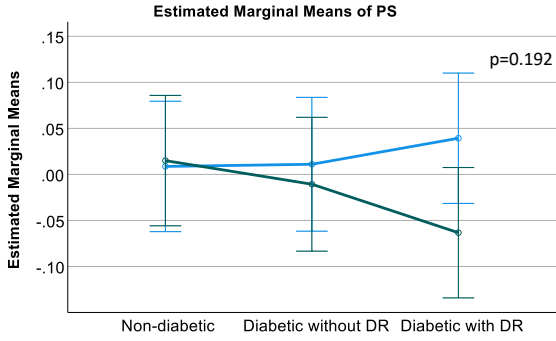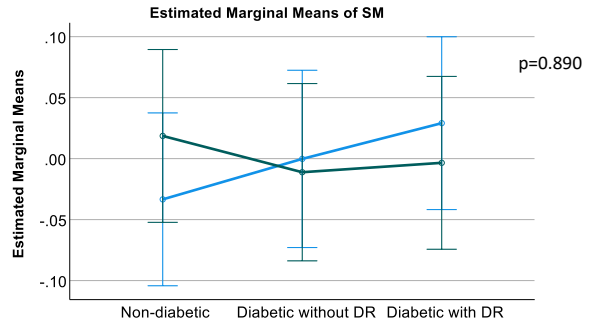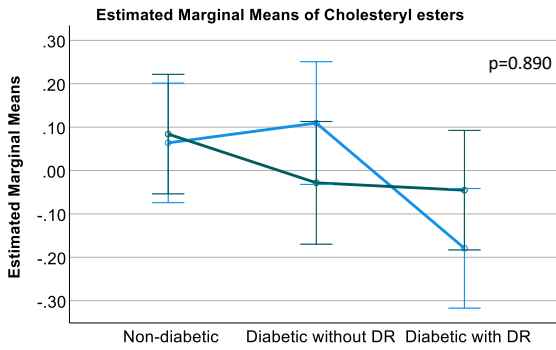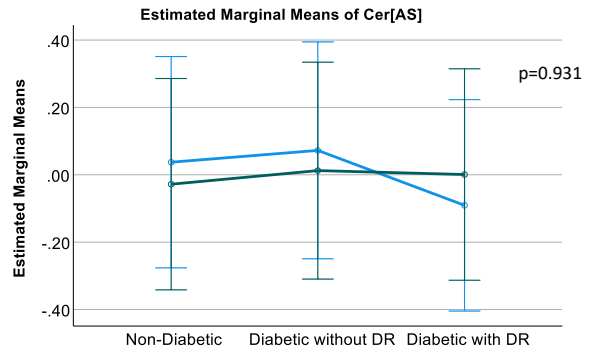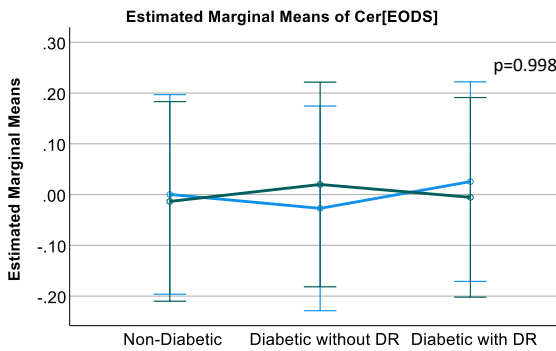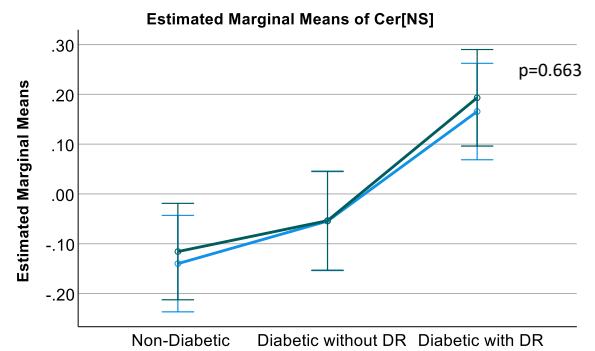

**Table S4:** Partial correlation coefficient of ACs, FFAs, and complex glycerolipids in the central retina of post-mortem cohort controlled by group membership. CR: central retina; PR: peripheral retina; sFFA: saturated free fatty acids; uFFA: unsaturated free fatty acids; FAHFA: Fatty Acid ester of Hydroxyl Fatty Acid; AC: acylcarnitines; DAG: diacylglycerols; PC: phosphatidylcholines; TAG: triacylglycerols

**A)**

|                   |                   | sFFA   | usFFA  | FAHFA<br>=<36:3 | FAHFA<br>>=38:4 | DAG long | DAG short | TAG Long | TAG Short | TAG Intrm | PC Long<br>PolyUnsat | PC Short | AC >=14 | AC <14 |       |
|-------------------|-------------------|--------|--------|-----------------|-----------------|----------|-----------|----------|-----------|-----------|----------------------|----------|---------|--------|-------|
| CR                | sFFA              | 1.000  | -0.614 | 0.076           | -0.375          | -0.163   | -0.190    | 0.000    | 0.243     | 0.219     | -0.126               | -0.122   | -0.028  | -0.034 |       |
|                   | usFFA             | -0.614 | 1.000  | -0.162          | 0.534           | 0.318    | 0.214     | 0.334    | -0.335    | -0.295    | 0.394                | 0.306    | 0.072   | 0.124  |       |
|                   | FAHFA <=36:3      | 0.076  | -0.162 | 1.000           | 0.558           | 0.000    | 0.268     | -0.130   | 0.074     | -0.010    | -0.098               | -0.146   | 0.154   | -0.169 |       |
|                   | FAHFA >=38:4      | -0.375 | 0.534  | 0.558           | 1.000           | 0.345    | 0.298     | 0.230    | -0.238    | -0.167    | 0.290                | 0.077    | 0.175   | -0.089 |       |
|                   | DAG long          | -0.163 | 0.318  | 0.000           | 0.345           | 1.000    | -0.006    | 0.346    | -0.006    | 0.073     | 0.600                | 0.240    | 0.034   | 0.003  |       |
|                   | DAG short         | -0.190 | 0.214  | 0.268           | 0.298           | -0.006   | 1.000     | -0.182   | -0.065    | -0.124    | -0.246               | -0.091   | 0.244   | -0.081 |       |
|                   | TAG Long          | 0.000  | 0.334  | -0.130          | 0.230           | 0.346    | -0.182    | 1.000    | -0.018    | 0.018     | 0.006                | 0.435    | 0.002   | -0.025 | 0.113 |
|                   | TAG Short         | 0.243  | -0.335 | 0.074           | -0.238          | -0.303   | -0.065    | -0.018   | 1.000     | 0.006     | -0.180               | -0.153   | -0.084  | -0.115 |       |
|                   | TAG Intrm         | 0.219  | -0.295 | -0.010          | -0.167          | 0.073    | -0.124    | 0.018    | 0.006     | 1.000     | 0.022                | 0.398    | -0.451  | 0.281  |       |
|                   | PC Long PolyUnsat | -0.126 | 0.394  | -0.098          | 0.290           | 0.600    | -0.246    | 0.435    | -0.180    | 0.022     | 1.000                | 0.113    | 0.002   | -0.174 | 0.124 |
|                   | PC Short          | -0.122 | 0.306  | -0.146          | 0.077           | 0.240    | -0.091    | 0.002    | -0.153    | 0.398     | 0.113                | 1.000    | -0.391  | -0.687 |       |
|                   | AC >=14           | -0.028 | 0.072  | 0.154           | 0.175           | 0.034    | 0.244     | -0.025   | -0.084    | -0.451    | -0.174               | -0.391   | 1.000   | -0.687 |       |
|                   | AC <14            | -0.034 | 0.124  | -0.169          | -0.089          | 0.003    | -0.081    | 0.113    | -0.115    | 0.281     | 0.124                | 0.231    | -0.687  | 1.000  |       |
|                   | PR                | sFFA   | 1.000  | -0.790          | 0.113           | -0.625   | -0.393    | -0.309   | -0.150    | 0.559     | 0.201                | -0.444   | -0.200  | -0.073 | 0.278 |
| usFFA             |                   | -0.790 | 1.000  | 0.076           | 0.727           | 0.269    | 0.342     | 0.084    | -0.425    | -0.124    | 0.469                | 0.417    | -0.030  | -0.094 |       |
| FAHFA <=36:3      |                   | 0.113  | 0.076  | 1.000           | 0.436           | -0.330   | 0.030     | 0.083    | 0.222     | -0.041    | -0.232               | 0.147    | 0.184   | -0.017 |       |
| FAHFA >=38:4      |                   | -0.625 | 0.727  | 0.436           | 1.000           | 0.266    | 0.301     | 0.291    | -0.257    | -0.161    | 0.481                | 0.246    | 0.006   | -0.280 |       |
| DAG long          |                   | -0.393 | 0.269  | -0.330          | 0.266           | 1.000    | -0.006    | 0.255    | -0.517    | 0.280     | 0.770                | 0.214    | 0.002   | -0.337 |       |
| DAG short         |                   | -0.309 | 0.342  | 0.030           | 0.301           | -0.006   | 1.000     | -0.092   | -0.204    | -0.313    | -0.017               | -0.149   | 0.052   | -0.080 |       |
| TAG Long          |                   | -0.150 | 0.084  | 0.083           | 0.291           | 0.255    | -0.092    | 1.000    | -0.044    | 0.000     | 0.401                | -0.191   | 0.129   | -0.269 |       |
| TAG Short         |                   | 0.559  | -0.425 | 0.222           | -0.257          | -0.517   | -0.204    | -0.044   | 1.000     | 0.000     | -0.462               | -0.197   | 0.101   | 0.019  |       |
| TAG Intrm         |                   | 0.201  | -0.124 | -0.041          | -0.161          | 0.280    | -0.313    | 0.000    | 0.000     | 1.000     | 0.092                | 0.478    | -0.214  | -0.062 |       |
| PC Long PolyUnsat |                   | -0.444 | 0.469  | -0.232          | 0.481           | 0.770    | -0.017    | 0.401    | -0.462    | 0.092     | 1.000                | 0.128    | -0.107  | -0.321 |       |
| PC Short          |                   | -0.200 | 0.417  | 0.147           | 0.246           | 0.214    | -0.149    | -0.191   | -0.197    | 0.478     | 0.128                | 1.000    | -0.288  | 0.107  |       |
| AC >=14           |                   | -0.073 | -0.030 | 0.184           | 0.006           | 0.002    | 0.052     | 0.129    | 0.101     | -0.214    | -0.107               | -0.288   | 1.000   | -0.277 |       |
| AC <14            |                   | 0.278  | -0.094 | -0.017          | -0.280          | -0.337   | -0.080    | -0.269   | 0.019     | -0.062    | -0.321               | 0.107    | -0.277  | 1.000  |       |

**B)**

|                   |                   | sFFA     | usFFA    | FAHFA<br>=<36:3 | FAHFA<br>>=38:4 | DAG long | DAG short | TAG Long | TAG Short | TAG Intrm | PC Long<br>PolyUnsat | PC Short | AC >=14  | AC <14   |
|-------------------|-------------------|----------|----------|-----------------|-----------------|----------|-----------|----------|-----------|-----------|----------------------|----------|----------|----------|
| CR                | sFFA              |          | 2.91E-07 | 5.69E-01        | 3.71E-03        | 2.23E-01 | 1.54E-01  | 1.00E+00 | 6.57E-02  | 9.83E-02  | 3.46E-01             | 3.62E-01 | 8.34E-01 | 8.03E-01 |
|                   | usFFA             | 2.91E-07 |          | 2.24E-01        | 1.56E-05        | 1.51E-02 | 1.07E-01  | 1.05E-02 | 1.01E-02  | 2.46E-02  | 2.23E-03             | 1.94E-02 | 5.91E-01 | 3.55E-01 |
|                   | FAHFA <=36:3      | 5.69E-01 | 2.24E-01 |                 | 5.42E-06        | 9.99E-01 | 4.20E-02  | 3.31E-01 | 5.80E-01  | 9.42E-01  | 4.64E-01             | 2.76E-01 | 2.48E-01 | 2.05E-01 |
|                   | FAHFA >=38:4      | 3.71E-03 | 1.56E-05 | 5.42E-06        |                 | 8.07E-03 | 2.30E-02  | 8.27E-02 | 7.19E-02  | 2.11E-01  | 2.70E-02             | 5.65E-01 | 1.89E-01 | 5.09E-01 |
|                   | DAG long          | 2.23E-01 | 1.51E-02 | 9.99E-01        | 8.07E-03        |          | 9.63E-01  | 9.63E-01 | 7.90E-03  | 2.06E-02  | 5.84E-01             | 6.51E-07 | 6.95E-02 | 8.01E-01 |
|                   | DAG short         | 1.54E-01 | 1.07E-01 | 4.20E-02        | 2.30E-02        | 9.63E-01 |           | 1.72E-01 | 6.29E-01  | 3.54E-01  | 6.27E-02             | 4.99E-01 | 6.44E-02 | 5.46E-01 |
|                   | TAG Long          | 1.00E+00 | 1.05E-02 | 3.31E-01        | 8.27E-02        | 7.90E-03 | 1.72E-01  |          | 8.92E-01  | 8.95E-01  | 6.39E-04             | 9.85E-01 | 8.51E-01 | 3.98E-01 |
|                   | TAG Short         | 6.57E-02 | 1.01E-02 | 5.80E-01        | 7.19E-02        | 2.06E-02 | 6.29E-01  | 8.92E-01 |           | 9.65E-01  | 1.76E-01             | 2.51E-01 | 5.33E-01 | 3.88E-01 |
|                   | TAG Intrm         | 9.83E-02 | 2.46E-02 | 9.42E-01        | 2.11E-01        | 5.84E-01 | 3.54E-01  | 8.95E-01 | 9.65E-01  |           | 8.68E-01             | 2.00E-03 | 3.80E-04 | 3.29E-02 |
|                   | PC Long PolyUnsat | 3.46E-01 | 2.23E-03 | 4.64E-01        | 2.70E-02        | 6.51E-07 | 6.27E-02  | 6.39E-04 | 1.76E-01  | 8.68E-01  |                      | 3.98E-01 | 1.91E-01 | 3.54E-01 |
|                   | PC Short          | 3.62E-01 | 1.94E-02 | 2.76E-01        | 5.65E-01        | 6.95E-02 | 4.99E-01  | 9.85E-01 | 2.51E-01  | 2.00E-03  | 3.98E-01             |          | 2.43E-03 | 8.11E-02 |
|                   | AC >=14           | 8.34E-01 | 5.91E-01 | 2.48E-01        | 1.89E-01        | 8.01E-01 | 6.44E-02  | 8.51E-01 | 5.33E-01  | 3.80E-04  | 1.91E-01             | 2.43E-03 |          | 2.61E-09 |
|                   | AC <14            | 8.03E-01 | 3.55E-01 | 2.05E-01        | 5.09E-01        | 9.84E-01 | 5.46E-01  | 3.98E-01 | 3.88E-01  | 3.29E-02  | 3.54E-01             | 8.11E-02 | 2.61E-09 |          |
|                   | PR                | sFFA     |          | 1.75E-13        | 3.97E-01        | 1.60E-07 | 2.30E-03  | 1.82E-02 | 2.62E-01  | 5.05E-06  | 1.30E-01             | 4.82E-04 | 1.33E-01 | 5.86E-01 |
| usFFA             |                   | 1.75E-13 |          | 5.71E-01        | 1.03E-10        | 4.13E-02 | 8.60E-03  | 5.31E-01 | 8.75E-04  | 3.55E-01  | 2.04E-04             | 1.13E-03 | 8.24E-01 | 4.82E-01 |
| FAHFA <=36:3      |                   | 3.97E-01 | 5.71E-01 |                 | 6.21E-04        | 1.14E-02 | 8.23E-01  | 5.36E-01 | 9.47E-02  | 7.60E-01  | 7.99E-02             | 2.72E-01 | 1.66E-01 | 9.00E-01 |
| FAHFA >=38:4      |                   | 1.60E-07 | 1.03E-10 | 6.21E-04        |                 | 4.38E-02 | 2.16E-02  | 2.66E-02 | 5.19E-02  | 2.28E-01  | 1.34E-04             | 6.28E-02 | 9.64E-01 | 3.35E-02 |
| DAG long          |                   | 2.30E-03 | 4.13E-02 | 1.14E-02        | 4.38E-02        |          | 9.62E-01  | 5.35E-02 | 3.22E-05  | 3.33E-02  | 1.60E-12             | 1.07E-01 | 9.86E-01 | 9.71E-03 |
| DAG short         |                   | 1.82E-02 | 8.60E-03 | 8.23E-01        | 2.16E-02        | 9.62E-01 |           | 4.94E-01 | 4.94E-01  | 1.24E-01  | 1.66E-02             | 9.01E-01 | 2.64E-01 | 6.97E-01 |
| TAG Long          |                   | 2.62E-01 | 5.31E-01 | 5.36E-01        | 2.66E-02        | 5.35E-02 | 4.94E-01  |          | 7.45E-01  | 9.99E-01  | 1.83E-03             | 1.52E-01 | 3.33E-01 | 4.09E-02 |
| TAG Short         |                   | 5.05E-06 | 8.75E-04 | 9.47E-02        | 5.19E-02        | 3.22E-05 | 1.24E-01  | 7.45E-01 |           | 9.99E-01  | 2.65E-04             | 1.37E-01 | 4.50E-01 | 8.88E-01 |
| TAG Intrm         |                   | 1.30E-01 | 3.55E-01 | 7.60E-01        | 2.28E-01        | 3.33E-02 | 1.66E-02  | 9.99E-01 | 9.99E-01  |           | 4.93E-01             | 1.50E-04 | 1.06E-01 | 6.46E-01 |
| PC Long PolyUnsat |                   | 4.82E-04 | 2.04E-04 | 7.99E-02        | 1.34E-04        | 1.60E-12 | 9.01E-01  | 1.83E-03 | 2.65E-04  | 4.93E-01  |                      | 3.38E-01 | 4.23E-01 | 1.39E-02 |
| PC Short          |                   | 1.33E-01 | 1.13E-03 | 2.72E-01        | 6.28E-02        | 1.07E-01 | 2.64E-01  | 1.52E-01 | 1.37E-01  | 1.50E-04  | 3.38E-01             |          | 2.86E-02 | 4.24E-01 |
| AC >=14           |                   | 5.86E-01 | 8.24E-01 | 1.66E-01        | 9.64E-01        | 9.86E-01 | 6.97E-01  | 3.33E-01 | 4.50E-01  | 1.06E-01  | 4.23E-01             | 2.86E-02 |          | 3.50E-02 |
| AC <14            |                   | 3.46E-02 | 4.82E-01 | 9.00E-01        | 3.35E-02        | 9.71E-03 | 5.53E-01  | 4.09E-02 | 8.88E-01  | 6.46E-01  | 1.39E-02             | 4.24E-01 | 3.50E-02 |          |

**Fig S2:** Comparing inter- and intra-assay coefficients of variation of internal standards in test pools and pooled plasma in Pima Indians.

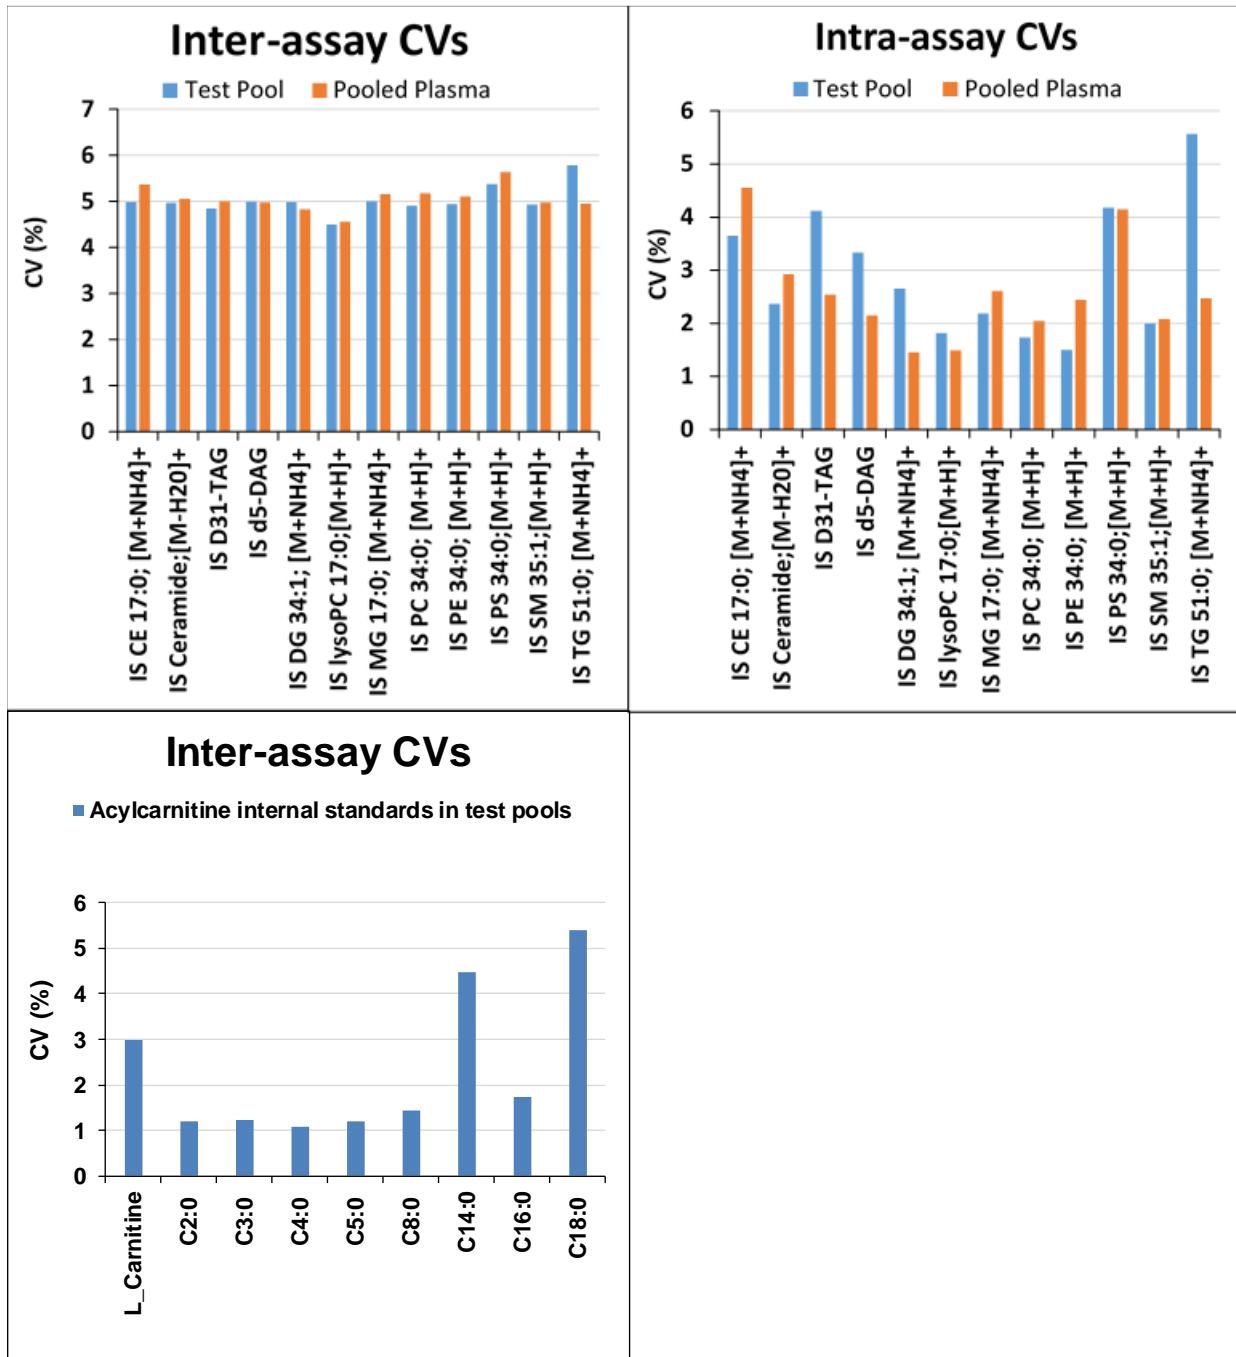

**Fig S3:** Illustration of minimal batch to batch variation in Pima Indians.

**A)** Distribution of lipidomic platform internal standards in test pools in sequential runs across different batches

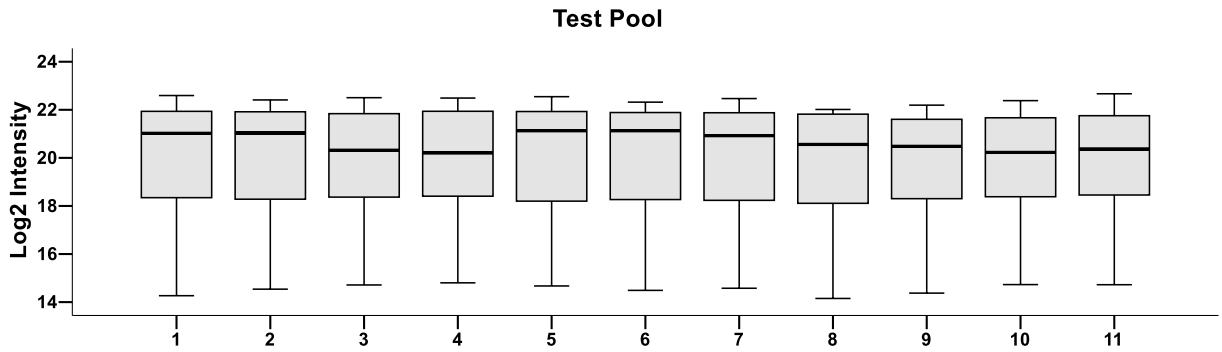

**B)** Distribution of lipidomic platform internal standards in pooled plasma in sequential runs across different batches

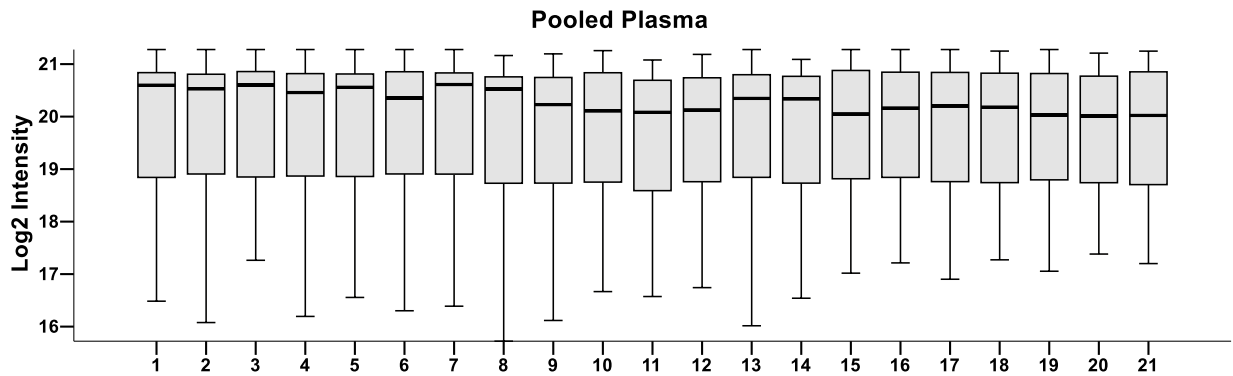

**C)** Distribution of acylcarnitine internal standards in pooled plasma in sequential runs across different batches

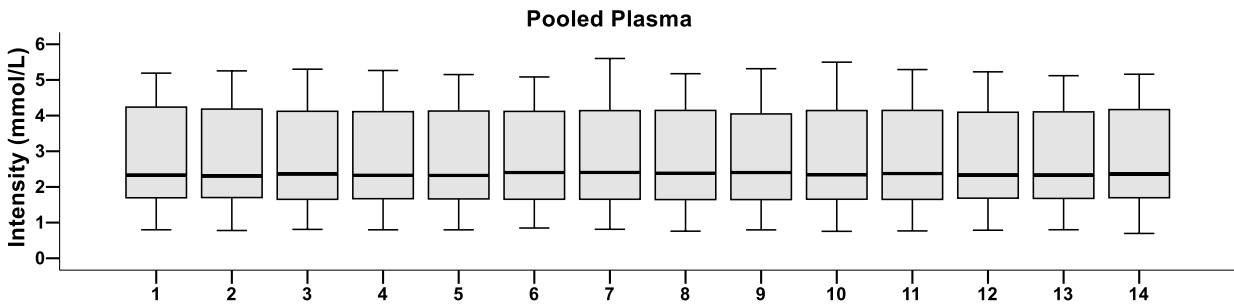

**Fig S4:** Comparing inter- and intra-assay coefficients of variation of internal standards in test pools and pooled plasma in postmortem cohort.

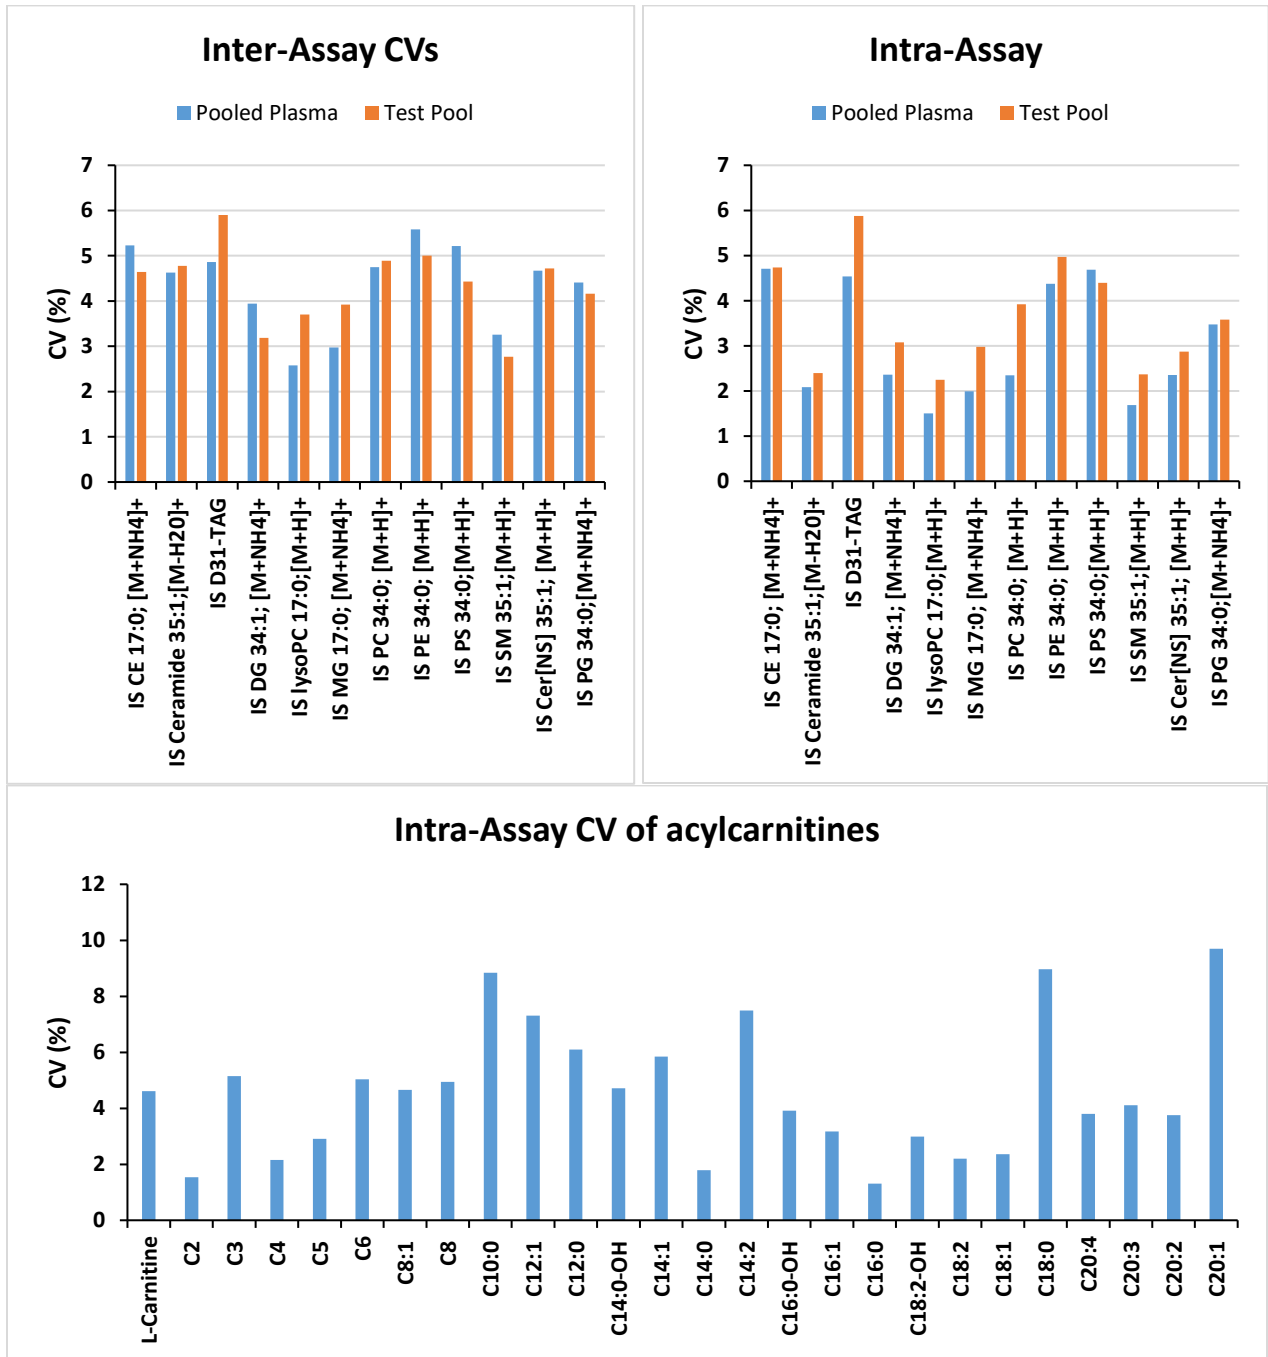

**Fig S5:** Illustration of minimal batch to batch variation in postmortem cohort.

**A)** Distribution of lipidomic internal standards in pooled plasma in sequential runs across different batches

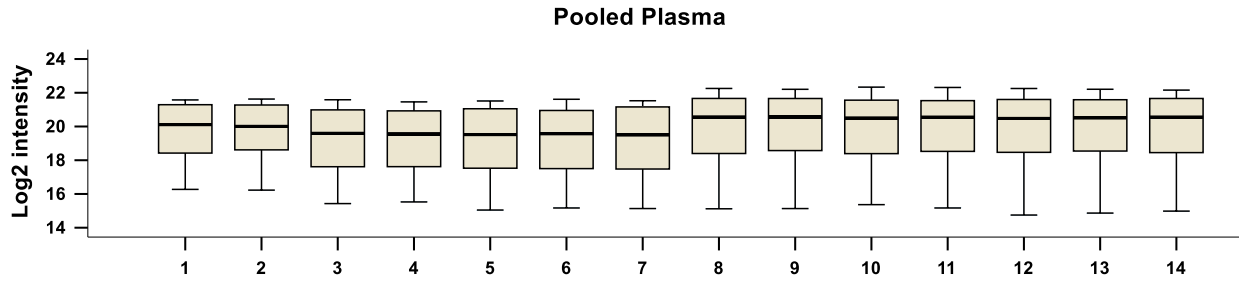

**B)** Distribution of lipidomic internal standards in test pools in sequential runs across different batches

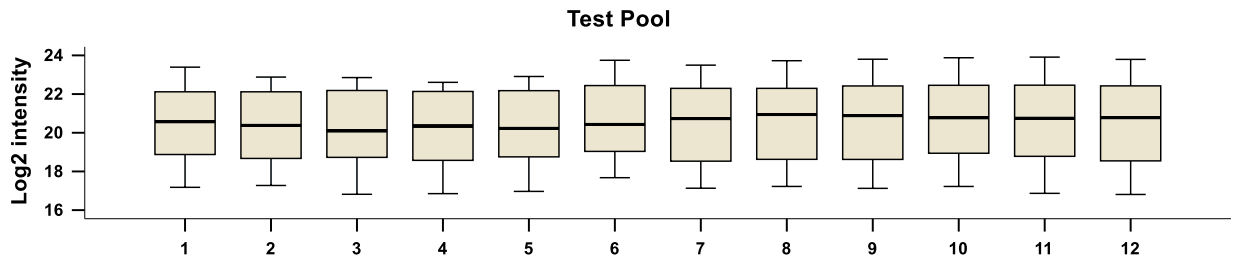

**C)** Distribution of acylcarnitine internal standards in Test Pools in sequential runs across different batches

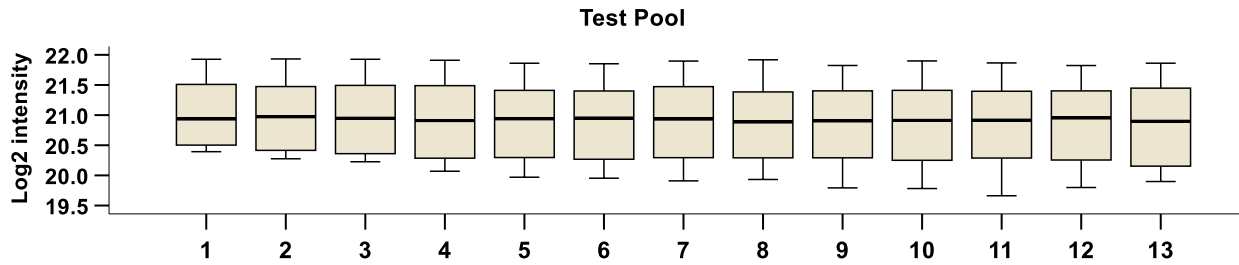

Supplement: jciinsight-6-152109-s176.pdf [file jciinsight-6-152109-s176.pdf]
